# Supplementary material for: Complementary CRISPR screen highlights the contrasting role of membrane-bound and soluble ICAM-1 in regulating antigen-specific tumor cell killing by cytotoxic T cells
Source: eLife. 2023 Sep 21;12:e84314. doi: 10.7554/eLife.84314 (PMC10586807; doi:10.7554/eLife.84314)
Supplement: Figure 2—source data 1. [file elife-84314-fig2-data1.xlsx]

## Sheet: Sheet 1
Gene ID	KO_score	KO_FDR	AC_score	AC_FDR	specificity
ABCE1	-11.9928	2.6e-05	-2.94481	0.045844	KO negative			AC = CRISPRa screen
ABCB7	-10.2469	2.6e-05	-3.92394	0.009463	common			KO = CRISPR KO screen
SLC7A6OS	-10.029	2.6e-05	-2.16276	0.113468	KO negative			common = gene hit in CRISPRa and CRISPR KO screen
IPO13	-9.9523	2.6e-05	-3.4877	0.019723	common
SCD	-9.94493	2.6e-05	1.09655	0.754241	KO negative
EFTUD2	-9.8688	2.6e-05	0.0401528	1	KO negative
TFRC	-9.79732	2.6e-05	0.0301137	1	KO negative
TOP2A	-9.70604	2.6e-05	0.178788	1	KO negative
AARS	-9.64793	2.6e-05	0.834726	0.973758	KO negative
SLC25A3	-9.59915	2.6e-05	-6.00114	0.00121	common
DDX41	-9.58309	2.6e-05	0.39599	1	KO negative
ESPL1	-9.52295	2.6e-05	-0.554085	1	KO negative
VCP	-9.46263	2.6e-05	-1.23931	0.883352	KO negative
KPNB1	-9.43375	2.6e-05	-6.24368	0.000798	common
RUVBL2	-9.3112	2.6e-05	0.576689	1	KO negative
CSE1L	-9.28679	2.6e-05	-1.99166	0.258188	KO negative
ATR	-9.23304	2.6e-05	-0.0695145	1	KO negative
POLR1B	-9.2052	2.6e-05	1.21966	0.664251	KO negative
MARS	-9.15174	2.6e-05	1.74158	0.399941	KO negative
PSMB4	-9.11268	2.6e-05	-0.292915	1	KO negative
RRM1	-9.09006	2.6e-05	-0.217391	1	KO negative
HMGCS1	-9.05845	2.6e-05	0.775674	1	KO negative
XPO1	-9.02994	2.6e-05	-5.42523	0.001718	common
DHDDS	-9.01303	2.6e-05	0.190912	1	KO negative
DHX16	-8.9709	2.6e-05	0.150857	1	KO negative
IARS2	-8.93446	2.6e-05	0.16202	1	KO negative
PSMB3	-8.91208	2.6e-05	-0.115511	1	KO negative
PSMB6	-8.89729	2.6e-05	-0.0401195	1	KO negative
DDX21	-8.86912	2.6e-05	0.12542	1	KO negative
POLR3B	-8.85577	2.6e-05	-0.217391	1	KO negative
SLC35B1	-8.83767	2.6e-05	-4.53544	0.003176	common
LONP1	-8.77211	2.6e-05	-3.26515	0.028545	KO negative
ABCF1	-8.73391	2.6e-05	-3.40055	0.023431	KO negative
MVK	-8.65649	2.6e-05	0.0329859	1	KO negative
POLD1	-8.62193	2.6e-05	-0.367462	1	KO negative
DUX4	-8.61531	2.6e-05	0	1	KO negative
GTF3C4	-8.57149	2.6e-05	0.69452	1	KO negative
COPA	-8.55635	2.6e-05	2.503	0.175168	KO negative
PSMA6	-8.52466	2.6e-05	-0.0874432	1	KO negative
PSMB2	-8.49804	2.6e-05	-0.0743012	1	KO negative
YARS	-8.48288	2.6e-05	0.117202	1	KO negative
AURKA	-8.47974	2.6e-05	-0.0542705	1	KO negative
COPS5	-8.46094	2.6e-05	-0.14413	1	KO negative
USP39	-8.43299	2.6e-05	-1.2006	0.925057	KO negative
ADSL	-8.34789	2.6e-05	-0.271573	1	KO negative
EIF4A1	-8.30931	2.6e-05	1.4844	0.513165	KO negative
POLE	-8.29071	2.6e-05	-0.111046	1	KO negative
PSMA5	-8.28196	2.6e-05	-0.821541	1	KO negative
DHX37	-8.27613	2.6e-05	-0.0655571	1	KO negative
CLP1	-8.27516	2.6e-05	-0.882828	1	KO negative
MAT2A	-8.27032	2.6e-05	0.142101	1	KO negative
GMPPB	-8.26778	2.6e-05	-0.107004	1	KO negative
FBL	-8.25778	2.6e-05	-0.518371	1	KO negative
PSMA3	-8.21439	2.6e-05	-0.199352	1	KO negative
FNTA	-8.21197	2.6e-05	0.951131	0.879387	KO negative
MCM2	-8.195	2.6e-05	-0.517241	1	KO negative
CSNK1A1	-8.18187	2.6e-05	-0.122565	1	KO negative
AASDHPPT	-8.18	2.6e-05	-0.456951	1	KO negative
SLC30A9	-8.16416	2.6e-05	-4.42886	0.003932	common
PSMB7	-8.11744	2.6e-05	-0.105462	1	KO negative
HARS	-8.09541	2.6e-05	0.15589	1	KO negative
MTHFD1	-8.09451	2.6e-05	-0.217391	1	KO negative
PSTK	-8.07559	2.6e-05	-0.119341	1	KO negative
CDC5L	-8.0738	2.6e-05	-0.243341	1	KO negative
KCMF1	-8.05413	2.6e-05	-3.09813	0.036325	KO negative
SKP1	-8.05235	2.6e-05	-1.17842	0.95056	KO negative
PGD	-8.05146	2.6e-05	-0.73438	1	KO negative
POLR3A	-8.04436	2.6e-05	0.0589758	1	KO negative
CLNS1A	-8.02844	2.6e-05	-5.4571	0.001718	common
PGK1	-8.02403	2.6e-05	-0.228824	1	KO negative
WBSCR22	-8.02139	2.6e-05	0	1	KO negative
PSMB5	-8.00736	2.6e-05	-0.0735392	1	KO negative
SLC7A1	-7.99952	2.6e-05	-4.75208	0.002752	common
KARS	-7.98645	2.6e-05	-0.0997531	1	KO negative
TAF1	-7.96916	2.6e-05	-0.570716	1	KO negative
TAF8	-7.96142	2.6e-05	-1.20688	0.917291	KO negative
CTPS1	-7.91628	2.6e-05	0.138406	1	KO negative
POLR1A	-7.90365	2.6e-05	-0.105252	1	KO negative
OR4F21	-7.8986	2.6e-05	0	1	KO negative
GPN1	-7.89272	2.6e-05	1.69067	0.424129	KO negative
OR4F17	-7.88187	2.6e-05	-6.35732	0.000646	common
QARS	-7.88104	2.6e-05	0.279378	1	KO negative
AURKB	-7.86525	2.6e-05	-0.623423	1	KO negative
DDX56	-7.86277	2.6e-05	0.226704	1	KO negative
HUWE1	-7.85285	2.6e-05	-0.0545954	1	KO negative
IPO9	-7.81847	2.6e-05	-3.77358	0.012489	common
DPAGT1	-7.79983	2.6e-05	-0.0895677	1	KO negative
GTF2B	-7.79822	2.6e-05	-0.113616	1	KO negative
DDX23	-7.75659	2.6e-05	1.67566	0.430915	KO negative
DDX52	-7.74865	2.6e-05	0.213355	1	KO negative
RNGTT	-7.74627	2.6e-05	-0.615324	1	KO negative
E4F1	-7.73128	2.6e-05	-0.113808	1	KO negative
USP17L17	-7.72972	2.6e-05	0	1	KO negative
CEPT1	-7.7258	2.6e-05	-0.0846318	1	KO negative
PCYT1A	-7.72109	2.6e-05	-0.679501	1	KO negative
TERF2	-7.71717	2.6e-05	-0.0946197	1	KO negative
KAT5	-7.71559	2.6e-05	-0.184529	1	KO negative
RBBP6	-7.71483	2.6e-05	-1.23386	0.888375	KO negative
ATP6V1B2	-7.68605	2.6e-05	0.719171	1	KO negative
TRAIP	-7.65914	2.6e-05	-0.778899	1	KO negative
NGRN	-7.65455	2.6e-05	0.018707	1	KO negative
SNUPN	-7.64311	2.6e-05	-4.42174	0.003932	common
RPS8	-7.62569	2.6e-05	0.479071	1	KO negative
NOL9	-7.57482	2.6e-05	-0.0371952	1	KO negative
USP5	-7.57334	2.6e-05	-0.112782	1	KO negative
UBA2	-7.53292	2.6e-05	0.26572	1	KO negative
RFK	-7.5293	2.6e-05	-0.624977	1	KO negative
AFG3L2	-7.50393	2.6e-05	-0.122583	1	KO negative
KAT8	-7.49421	2.6e-05	-0.613822	1	KO negative
FARSA	-7.48525	2.6e-05	0.734192	1	KO negative
RNF40	-7.48025	2.6e-05	-0.0735598	1	KO negative
PPP1R10	-7.47954	2.6e-05	-0.904238	1	KO negative
RAD9A	-7.47668	2.6e-05	0.701474	1	KO negative
DHPS	-7.46671	2.6e-05	0.253467	1	KO negative
UBA1	-7.46423	2.6e-05	0.237854	1	KO negative
DNM2	-7.41604	2.6e-05	1.59979	0.467407	KO negative
GFM1	-7.41326	2.6e-05	-0.943743	1	KO negative
MYC	-7.41256	2.6e-05	-0.0716605	1	KO negative
TXN	-7.40352	2.6e-05	-0.0715273	1	KO negative
DBR1	-7.35065	2.6e-05	0.336412	1	KO negative
CDIPT	-7.3425	2.6e-05	-0.533221	1	KO negative
DLST	-7.33777	2.6e-05	1.20091	0.67869	KO negative
POP7	-7.33303	2.6e-05	1.45246	0.530572	KO negative
NSMCE2	-7.30818	2.6e-05	-0.947421	1	KO negative
SLC39A7	-7.29217	2.6e-05	-3.8171	0.00868	common
ACO2	-7.28421	2.6e-05	0.302736	1	KO negative
ALG2	-7.27231	2.6e-05	-0.767996	1	KO negative
PPWD1	-7.26967	2.6e-05	0.79531	1	KO negative
DHX33	-7.26835	2.6e-05	0.17183	1	KO negative
MEPCE	-7.26769	2.6e-05	1.22032	0.664251	KO negative
USP7	-7.26177	2.6e-05	-0.208394	1	KO negative
ATIC	-7.25325	2.6e-05	0.205052	1	KO negative
POP5	-7.24671	2.6e-05	0.821368	0.988169	KO negative
EIF2S3	-7.24508	2.6e-05	-1.42824	0.645819	KO negative
MCM3	-7.23824	2.6e-05	0.236407	1	KO negative
DUT	-7.23703	2.6e-05	0.363562	1	KO negative
NAA20	-7.22978	2.6e-05	0.552656	1	KO negative
UBE2M	-7.19946	2.6e-05	0.208576	1	KO negative
G6PD	-7.19882	2.6e-05	-0.217391	1	KO negative
PISD	-7.18667	2.6e-05	1.51847	0.502868	KO negative
PRPF4B	-7.16505	2.6e-05	-0.0620861	1	KO negative
ANAPC11	-7.14237	2.6e-05	-0.131461	1	KO negative
TUT1	-7.10932	2.6e-05	-0.0609552	1	KO negative
TKT	-7.09141	2.6e-05	0.245201	1	KO negative
PRMT5	-7.09018	2.6e-05	0.739285	1	KO negative
OGT	-7.08649	2.6e-05	-0.456951	1	KO negative
GSPT1	-7.07363	2.6e-05	-0.0707344	1	KO negative
TRPM7	-7.06813	2.6e-05	0.0466463	1	KO negative
ELP3	-7.05717	2.6e-05	-0.361341	1	KO negative
VARS	-7.04965	2.6e-05	0.241028	1	KO negative
IDH3A	-7.04869	2.6e-05	0.125437	1	KO negative
SLC25A28	-7.03902	2.6e-05	-2.94055	0.046265	KO negative
DDX39B	-7.0348	2.6e-05	0.212235	1	KO negative
XPO5	-7.02398	2.6e-05	-3.67485	0.011474	common
MCM5	-7.02278	2.6e-05	0.257126	1	KO negative
WARS	-7.01979	2.6e-05	0.234868	1	KO negative
SOD1	-7.00427	2.6e-05	0.0799967	1	KO negative
CDK1	-7.00189	2.6e-05	-0.0695553	1	KO negative
RNF8	-6.98945	2.6e-05	-0.197883	1	KO negative
TTK	-6.97175	2.6e-05	-1.74304	0.383296	KO negative
IPO11	-6.9694	2.6e-05	-4.76538	0.002609	common
PPP1CB	-6.96469	2.6e-05	-0.164582	1	KO negative
RAD50	-6.96003	2.6e-05	0.72301	1	KO negative
DDX18	-6.94021	2.6e-05	0.172941	1	KO negative
PSMB1	-6.93945	2.6e-05	-0.904238	1	KO negative
DDX46	-6.92657	2.6e-05	0.168623	1	KO negative
RPAP2	-6.92398	2.6e-05	-0.0319142	1	KO negative
USPL1	-6.9188	2.6e-05	-0.865663	1	KO negative
GTF3C5	-6.90788	2.6e-05	-1.15703	0.970306	KO negative
KRAS	-6.89928	2.6e-05	0.0912255	1	KO negative
PNKP	-6.89644	2.6e-05	-0.217391	1	KO negative
MCM7	-6.89073	2.6e-05	0.03971	1	KO negative
ISG20L2	-6.88867	2.6e-05	0.868413	0.948633	KO negative
DTL	-6.87936	2.6e-05	2.82942	0.132859	KO negative
SARS	-6.86261	2.6e-05	0.084843	1	KO negative
POLR2B	-6.8593	2.6e-05	-0.0417181	1	KO negative
CDC7	-6.8593	2.6e-05	-0.0375644	1	KO negative
NFS1	-6.81051	2.6e-05	1.09442	0.75608	KO negative
SLC2A1	-6.80222	2.6e-05	-2.18804	0.181884	KO negative
SUPV3L1	-6.79177	2.6e-05	0.254426	1	KO negative
PPP1R8	-6.79014	2.6e-05	-0.201563	1	KO negative
LARS	-6.7743	2.6e-05	0.195125	1	KO negative
DHX38	-6.73964	2.6e-05	0.174061	1	KO negative
CPSF3	-6.73589	2.6e-05	0.079574	1	KO negative
GARS	-6.72143	2.6e-05	-0.288539	1	KO negative
MIS18BP1	-6.7177	2.6e-05	-0.569812	1	KO negative
TTF2	-6.7083	2.6e-05	0.749312	1	KO negative
MDM2	-6.69594	2.6e-05	-0.0963078	1	KO negative
PLK1	-6.69435	2.6e-05	-0.15774	1	KO negative
CXXC1	-6.69223	2.6e-05	-0.562567	1	KO negative
INTS12	-6.6838	2.6e-05	-0.155181	1	KO negative
EMG1	-6.67644	2.6e-05	0.247821	1	KO negative
CMTR1	-6.65866	2.6e-05	-0.775933	1	KO negative
SACM1L	-6.64774	7.1e-05	-0.299755	1	KO negative
LSG1	-6.64526	7.1e-05	0.504414	1	KO negative
UROD	-6.64049	7.1e-05	1.49289	0.511206	KO negative
TOP3A	-6.63015	7.1e-05	-0.232199	1	KO negative
RPS3	-6.60399	7.1e-05	0.170388	1	KO negative
DDX10	-6.59686	7.1e-05	0.252363	1	KO negative
CREBBP	-6.58924	7.1e-05	-4.76356	0.002609	common
ALDOA	-6.56196	7.1e-05	0.198631	1	KO negative
BRF1	-6.55044	7.1e-05	-0.217391	1	KO negative
MNAT1	-6.54496	7.1e-05	-0.530399	1	KO negative
GTF2A2	-6.54295	7.1e-05	-0.0360659	1	KO negative
PSMA4	-6.54092	7.1e-05	-0.144905	1	KO negative
TCF7L2	-6.53003	7.1e-05	0.2256	1	KO negative
NAA50	-6.52353	7.1e-05	0.0690917	1	KO negative
REV3L	-6.48729	0.000108	-1.47784	0.593173	KO negative
BPTF	-6.48381	0.000108	-0.136118	1	KO negative
PPAT	-6.47457	0.000108	0.802637	1	KO negative
ENY2	-6.47409	0.000108	-0.529428	1	KO negative
PPIA	-6.44606	0.000108	0.0369161	1	KO negative
POLR3K	-6.43839	0.000108	-0.197685	1	KO negative
DDX47	-6.4368	0.000108	0.182342	1	KO negative
C9orf114	-6.43588	0.000108	0	1	KO negative
SETD1A	-6.43457	0.000108	-0.542648	1	KO negative
IPO5	-6.42931	0.000108	-4.13667	0.006229	common
CHD4	-6.42025	0.000108	-1.91478	0.296004	KO negative
DDX55	-6.40413	0.000108	0.190939	1	KO negative
USP36	-6.40036	0.000108	-0.247521	1	KO negative
MASTL	-6.37218	0.000108	-0.107705	1	KO negative
DDX51	-6.3677	0.000108	-0.92325	1	KO negative
CDK7	-6.35522	0.000108	-0.108267	1	KO negative
POLA1	-6.34989	0.000108	-0.0610602	1	KO negative
C1QBP	-6.34431	0.000108	-0.166706	1	KO negative
PMPCA	-6.33662	0.000108	-0.226967	1	KO negative
FNTB	-6.33095	0.000108	-0.456951	1	KO negative
DDX24	-6.30762	0.000108	0.161396	1	KO negative
DOLK	-6.30398	0.000108	-0.484365	1	KO negative
TANGO6	-6.29354	0.00013	2.93215	0.119159	KO negative
HAPLN2	-6.29263	0.00013	-0.0990487	1	KO negative
UBR4	-6.29172	0.00013	2.91017	0.123267	KO negative
ERCC2	-6.28901	0.00013	-0.981341	1	KO negative
VTN	-6.25888	0.00013	-1.16987	0.957101	KO negative
ZNRD1	-6.25754	0.00013	-0.217391	1	KO negative
PNPT1	-6.25486	0.00013	1.89442	0.341408	KO negative
CTU1	-6.24639	0.00013	-0.0896745	1	KO negative
AATF	-6.2426	0.00013	-0.284548	1	KO negative
PPIL2	-6.22579	0.00013	-0.188613	1	KO negative
PMPCB	-6.21827	0.00013	-0.133394	1	KO negative
PRMT1	-6.21243	0.00013	0.908017	0.915543	KO negative
METAP2	-6.19572	0.00013	-0.120577	1	KO negative
EEF2	-6.1942	0.00013	-0.115261	1	KO negative
PRDM10	-6.19354	0.00013	-2.71334	0.068978	KO negative
RIOK1	-6.18679	0.00013	-0.126186	1	KO negative
MARS2	-6.18353	0.00013	0.216218	1	KO negative
FDXR	-6.18093	0.00013	0.124187	1	KO negative
DIS3	-6.174	0.00013	0.225468	1	KO negative
DDX54	-6.16536	0.00013	0.458009	1	KO negative
DDX27	-6.14204	0.00013	0.0909791	1	KO negative
PPIE	-6.13918	0.00013	0.123522	1	KO negative
TNPO1	-6.13491	0.00013	-3.0111	0.041291	KO negative
IDI1	-6.1332	0.00013	0.0617756	1	KO negative
PLK4	-6.12597	0.00013	-4.26642	0.005301	common
ATP6V0B	-6.12512	0.00013	-1.22629	0.895232	KO negative
RBX1	-6.11749	0.00013	-1.20664	0.917291	KO negative
DDX5	-6.11157	0.00013	0.80008	1	KO negative
EIF5B	-6.10374	0.00013	0.325846	1	KO negative
DHX15	-6.10136	0.00013	1.73102	0.403465	KO negative
UBE2I	-6.09892	0.00013	0.161699	1	KO negative
UPF1	-6.0985	0.00013	0.368262	1	KO negative
NOP2	-6.09514	0.00013	0.133772	1	KO negative
HNRNPA2B1	-6.05845	0.00013	-0.0855088	1	KO negative
RABGGTB	-6.05371	0.00013	0.402195	1	KO negative
HCN3	-6.04277	0.00013	-4.85291	0.002589	common
SNAPC4	-6.04236	0.00013	-0.136326	1	KO negative
NAT10	-6.03371	0.000156	0.388861	1	KO negative
POLE2	-6.02759	0.000156	0.365815	1	KO negative
XPOT	-6.02146	0.000156	-2.54292	0.094444	KO negative
PI4KA	-5.98822	0.000156	0.0382847	1	KO negative
TOP1	-5.98619	0.000156	0.834311	0.973758	KO negative
DDX49	-5.98305	0.000156	0.426247	1	KO negative
BRF2	-5.97737	0.000156	-0.0857785	1	KO negative
ATP1A1	-5.97253	0.000156	0.157697	1	KO negative
CNNM2	-5.97135	0.000156	-4.24961	0.005443	common
CDK9	-5.95817	0.000156	-0.715998	1	KO negative
ABCC6	-5.95554	0.000156	-4.72591	0.002872	common
LRP8	-5.953	0.000156	-0.679501	1	KO negative
AIFM1	-5.95113	0.000156	0.0819854	1	KO negative
RPP21	-5.94742	0.000156	0.154877	1	KO negative
ADAMTSL4	-5.94386	0.000156	-1.24279	0.878716	KO negative
GAPDH	-5.94085	0.000156	0.186452	1	KO negative
DARS	-5.93573	0.000156	0.789708	1	KO negative
PMVK	-5.92727	0.000156	-0.128888	1	KO negative
TRMT5	-5.90668	0.00019	0.126563	1	KO negative
SSU72	-5.89015	0.000223	-0.217391	1	KO negative
DHX9	-5.87445	0.000223	0.102708	1	KO negative
PKM	-5.85276	0.000252	-0.118969	1	KO negative
ALG1	-5.84695	0.000252	0.725634	1	KO negative
SLC25A26	-5.84625	0.000252	-3.99688	0.008285	common
DKC1	-5.84342	0.000252	0.153564	1	KO negative
HMGCR	-5.84064	0.000252	1.18723	0.689075	KO negative
PRIM2	-5.83574	0.000252	-0.727532	1	KO negative
GTF2A1	-5.83505	0.000252	-0.0980189	1	KO negative
MTOR	-5.82252	0.000314	1.53046	0.49765	KO negative
DOHH	-5.81781	0.000314	1.47821	0.515908	KO negative
EPRS	-5.81147	0.000314	0.295669	1	KO negative
RNF113A	-5.80088	0.000314	-0.18807	1	KO negative
RUVBL1	-5.79909	0.000314	0.226404	1	KO negative
ZBTB11	-5.77793	0.000342	-0.248752	1	KO negative
WRN	-5.77658	0.000342	2.98649	0.112416	KO negative
FTSJ3	-5.77283	0.000342	1.57289	0.480124	KO negative
GMPS	-5.77068	0.000342	-0.679501	1	KO negative
SENP6	-5.75968	0.000371	-0.121978	1	KO negative
YKT6	-5.7522	0.000371	0.276856	1	KO negative
TAF3	-5.74625	0.000371	-0.502269	1	KO negative
PRPF19	-5.74425	0.000397	-1.14175	0.986032	KO negative
XRCC6	-5.72561	0.000397	-0.166681	1	KO negative
DROSHA	-5.72365	0.000397	1.03578	0.800687	KO negative
PRIM1	-5.71108	0.000397	-0.356409	1	KO negative
RNMT	-5.70876	0.000397	0.113357	1	KO negative
THG1L	-5.69776	0.000416	-0.044962	1	KO negative
GDF10	-5.69253	0.000416	-0.315316	1	KO negative
ADM	-5.68212	0.000416	0.0186798	1	KO negative
GPHA2	-5.66819	0.000416	-0.117618	1	KO negative
GUK1	-5.66744	0.000416	0.122617	1	KO negative
SMG1	-5.66486	0.000416	-0.30507	1	KO negative
RARS	-5.6632	0.000416	0.308114	1	KO negative
TPI1	-5.66164	0.000416	0.166898	1	KO negative
XRN2	-5.63227	0.000416	0.467348	1	KO negative
TARS	-5.61522	0.000439	0.0977523	1	KO negative
NDUFS2	-5.60272	0.000439	0.136558	1	KO negative
ATP5B	-5.60029	0.000439	0	1	KO negative
ZNF574	-5.59705	0.000439	-0.658111	1	KO negative
KDM8	-5.59455	0.000439	-0.604796	1	KO negative
PGAM1	-5.56793	0.000439	0.0406056	1	KO negative
OR4M1	-5.55486	0.000468	-5.16256	0.001814	common
PIK3R4	-5.54362	0.000485	-0.0680542	1	KO negative
USO1	-5.54285	0.000485	1.46945	0.520531	KO negative
GTF2E1	-5.53006	0.000485	-0.127261	1	KO negative
EXOSC10	-5.52972	0.000485	0.853562	0.959952	KO negative
YBX1	-5.5277	0.000485	-0.217391	1	KO negative
BARD1	-5.52469	0.000485	-0.53217	1	KO negative
INO80	-5.51985	0.000485	0.210257	1	KO negative
POP1	-5.51111	0.000485	0.116112	1	KO negative
PARG	-5.5007	0.000485	0.187013	1	KO negative
PSMD14	-5.49891	0.000498	-1.10648	1	KO negative
TUFM	-5.49882	0.000498	-0.265392	1	KO negative
IMPDH2	-5.49282	0.000498	1.43837	0.536233	KO negative
BUB1B	-5.49182	0.000498	-2.29811	0.147245	KO negative
DDX3X	-5.48792	0.000498	1.02506	0.81044	KO negative
DDX42	-5.4845	0.000498	0.150409	1	KO negative
SPATA20	-5.48383	0.000498	-0.143072	1	KO negative
ZNF131	-5.47051	0.000498	0.219093	1	KO negative
NDOR1	-5.46993	0.000498	-0.174107	1	KO negative
BUB1	-5.45937	0.000498	-0.0685879	1	KO negative
GTF2H4	-5.44945	0.000498	-0.217391	1	KO negative
DHX35	-5.42376	0.000638	-0.447466	1	KO negative
UHRF1	-5.41998	0.000663	-2.22406	0.169389	KO negative
TARS2	-5.41596	0.000663	0.243014	1	KO negative
NOSIP	-5.41017	0.000685	-0.13232	1	KO negative
POLR2I	-5.40852	0.000685	-0.241959	1	KO negative
CHEK1	-5.40739	0.000685	-0.101851	1	KO negative
CHMP2A	-5.39771	0.000705	1.27736	0.627799	KO negative
DCTN2	-5.39216	0.000705	3.3949	0.072111	KO negative
MCM6	-5.39147	0.000705	0.0779704	1	KO negative
WFIKKN2	-5.37681	0.000705	0.0239207	1	KO negative
OR4D1	-5.36823	0.000719	-4.21528	0.005659	common
DNAJC2	-5.36759	0.000719	-0.217391	1	KO negative
GGPS1	-5.36726	0.000719	0.413987	1	KO negative
ADSS	-5.36347	0.000719	-0.190831	1	KO negative
DNA2	-5.36326	0.000719	0.13489	1	KO negative
SKIV2L2	-5.36222	0.000719	0	1	KO negative
XRCC5	-5.35019	0.000719	0.43659	1	KO negative
FBXW11	-5.32913	0.00074	-0.207454	1	KO negative
POP4	-5.32039	0.00074	0.956441	0.874368	KO negative
FBXO5	-5.318	0.00074	-0.504026	1	KO negative
ATP6V1A	-5.28974	0.000765	0.266001	1	KO negative
RTCB	-5.28246	0.000816	0.191134	1	KO negative
UCN	-5.27586	0.000841	-0.324542	1	KO negative
TDGF1	-5.27066	0.00086	-1.06821	1	KO negative
LPAR2	-5.27004	0.00086	-5.64487	0.001544	common
ALG10B	-5.26271	0.00086	-6.09395	0.000912	common
NARS	-5.24275	0.00088	0.46329	1	KO negative
PAFAH1B1	-5.24011	0.00088	1.01675	0.818031	KO negative
RPP30	-5.23695	0.00088	-0.355699	1	KO negative
VDAC2	-5.23169	0.000891	-4.69951	0.003011	common
TCEB1	-5.21461	0.000901	0	1	KO negative
IL17C	-5.19705	0.000972	-0.0546201	1	KO negative
PPP2R1A	-5.19575	0.000972	1.94877	0.318817	KO negative
FXN	-5.18488	0.000972	0.118918	1	KO negative
RPE	-5.16549	0.000982	-0.185326	1	KO negative
PKMYT1	-5.16142	0.000982	-0.237389	1	KO negative
FBXO42	-5.16101	0.000982	-0.155579	1	KO negative
FNDC5	-5.15896	0.000982	-0.889882	1	KO negative
MCM4	-5.1458	0.000982	1.0917	0.758332	KO negative
NUP98	-5.13969	0.000982	-3.98552	0.008544	common
CYB5B	-5.12518	0.001005	-4.58705	0.003165	common
CATSPER1	-5.11651	0.001104	-1.94371	0.280874	KO negative
SMARCA4	-5.10989	0.001174	0.272605	1	KO negative
POMP	-5.10758	0.001174	-2.5356	0.0957	KO negative
KCNIP2	-5.105	0.001194	-3.17098	0.032906	KO negative
VDAC3	-5.10213	0.001194	-3.4026	0.02334	KO negative
CARS	-5.09341	0.001241	0.891943	0.928529	KO negative
ARIH1	-5.08441	0.001288	-0.0950466	1	KO negative
CDAN1	-5.067	0.001384	3.0194	0.110287	KO negative
NUP205	-5.05439	0.001402	0.585612	1	KO negative
HCRTR2	-5.05241	0.001402	-3.01091	0.041291	KO negative
GLDN	-5.02972	0.001498	0.0290212	1	KO negative
SLC26A6	-5.02805	0.001511	-4.46676	0.003606	common
YARS2	-5.02751	0.001511	0.531136	1	KO negative
WNK1	-5.02704	0.001511	-1.04955	1	KO negative
MVD	-5.01859	0.001532	-0.922305	1	KO negative
RFWD3	-5.00695	0.001552	-0.122738	1	KO negative
EEFSEC	-5.00333	0.001561	-2.45085	0.11163	KO negative
NGLY1	-4.99619	0.001581	-0.217391	1	KO negative
REG4	-4.99289	0.001586	-0.150538	1	KO negative
ING3	-4.99153	0.001586	-1.28455	0.828762	KO negative
TP53RK	-4.97753	0.001606	-0.0324988	1	KO negative
PPA1	-4.953	0.001771	0.174308	1	KO negative
TRMT61A	-4.93326	0.001814	1.58499	0.474688	KO negative
VPS28	-4.92827	0.001834	1.55798	0.485414	KO negative
INHBE	-4.92234	0.001845	-0.0683388	1	KO negative
DTYMK	-4.92122	0.001845	-0.0636471	1	KO negative
VRK1	-4.91421	0.001845	-0.26971	1	KO negative
SLC4A7	-4.91151	0.001864	-1.12182	1	KO negative
DMBT1	-4.89544	0.001883	-0.0203742	1	KO negative
OR4Q3	-4.88884	0.001902	-3.28456	0.027994	KO negative
KMT2A	-4.88486	0.001917	-0.631695	1	KO negative
SLC7A9	-4.88382	0.001917	-3.22147	0.030471	KO negative
FURIN	-4.877	0.001926	-0.0783499	1	KO negative
DDX59	-4.87566	0.001926	0.304737	1	KO negative
IARS	-4.87238	0.001926	0.346923	1	KO negative
TRIM28	-4.8696	0.001945	-1.64509	0.450573	KO negative
ZBTB17	-4.86151	0.001987	-0.471919	1	KO negative
PELO	-4.85624	0.002006	0.242103	1	KO negative
RPP38	-4.85226	0.002015	0.158234	1	KO negative
EIF4A3	-4.8522	0.002015	0.12962	1	KO negative
DHH	-4.85026	0.002015	-0.252479	1	KO negative
KIAA0100	-4.8352	0.002051	-0.107494	1	KO negative
SLC25A22	-4.83479	0.002051	-5.29636	0.001814	common
OGDH	-4.83286	0.002069	0.549705	1	KO negative
UBA3	-4.82652	0.002077	0.125721	1	KO negative
BAG6	-4.82411	0.002077	-0.84649	1	KO negative
SPCS2	-4.81483	0.002077	-1.40818	0.669986	KO negative
YME1L1	-4.81183	0.002077	-1.25994	0.856881	KO negative
OR2A4	-4.81175	0.002077	0	1	KO negative
LEP	-4.80766	0.002077	-0.191715	1	KO negative
S1PR3	-4.80688	0.002077	-4.48769	0.003464	common
HMCN1	-4.8033	0.002077	-0.105191	1	KO negative
QRSL1	-4.79593	0.002085	0.939076	0.890352	KO negative
PAICS	-4.79463	0.002085	0.164582	1	KO negative
N6AMT1	-4.79167	0.002085	1.70301	0.417178	KO negative
TSEN2	-4.78741	0.002103	0.731141	1	KO negative
GNB2L1	-4.78013	0.00212	0	1	KO negative
HTRA2	-4.77407	0.002145	-0.742465	1	KO negative
ARCN1	-4.77229	0.002145	2.33442	0.204126	KO negative
RBBP8	-4.77091	0.002145	0.209215	1	KO negative
DNMT1	-4.76917	0.002145	1.1282	0.732118	KO negative
CALR	-4.75918	0.002206	-0.0660523	1	KO negative
RRP12	-4.75446	0.002223	2.75444	0.138028	KO negative
CLEC3B	-4.74441	0.002257	0.0369587	1	KO negative
NADK	-4.74357	0.002257	0.118433	1	KO negative
VPS18	-4.7384	0.002274	-0.0680034	1	KO negative
SLC4A5	-4.73641	0.002291	-3.30936	0.026832	KO negative
NSF	-4.73386	0.002329	0.188995	1	KO negative
TELO2	-4.72986	0.002346	-0.217391	1	KO negative
PGS1	-4.71851	0.002362	-0.0794124	1	KO negative
SLC26A10	-4.71456	0.002373	-3.61092	0.015815	common
TGS1	-4.71348	0.002373	0.645661	1	KO negative
DHX8	-4.71048	0.00239	0.170439	1	KO negative
OR13A1	-4.70542	0.002427	-3.17788	0.032461	KO negative
OSGEP	-4.7003	0.002443	0.211287	1	KO negative
OR8I2	-4.6858	0.002444	-2.21141	0.173825	KO negative
CMPK1	-4.68185	0.002444	-0.075607	1	KO negative
SLC16A11	-4.68141	0.002444	-4.8567	0.002589	common
RNF20	-4.67992	0.002444	-0.0679323	1	KO negative
ATP6V0D1	-4.66821	0.002507	0.912006	0.912525	KO negative
SCUBE3	-4.66535	0.002507	-0.0975728	1	KO negative
RAF1	-4.66099	0.002507	-0.0294486	1	KO negative
METTL16	-4.66059	0.002507	1.7539	0.396446	KO negative
TAMM41	-4.65977	0.002522	-0.0929005	1	KO negative
NMT1	-4.64553	0.002595	0.294153	1	KO negative
GDF5	-4.63977	0.002595	-0.137547	1	KO negative
SLC38A2	-4.63833	0.002605	-5.40609	0.001718	common
EIF3F	-4.63586	0.002605	-0.159568	1	KO negative
SLC7A4	-4.63281	0.00262	-4.31489	0.00483	common
DIMT1	-4.61297	0.002801	0.279684	1	KO negative
EIF4ENIF1	-4.6111	0.002816	-3.91693	0.009608	common
ERCC6L	-4.60323	0.002892	-1.6069	0.47922	KO negative
IL17RA	-4.59594	0.002907	-0.0806865	1	KO negative
IL36G	-4.57641	0.003003	-0.652865	1	KO negative
SLC30A5	-4.57571	0.003011	-3.42383	0.022398	KO negative
PIK3CA	-4.57378	0.003011	0.025986	1	KO negative
IGFBP4	-4.56565	0.003025	-0.274031	1	KO negative
KCNS1	-4.55796	0.003033	-5.16104	0.001814	common
TACR1	-4.55772	0.003033	-4.946	0.002589	common
KMT2D	-4.55191	0.003067	-0.543771	1	KO negative
RHBG	-4.54983	0.003081	-4.49712	0.003431	common
SLC35B2	-4.54797	0.003095	-4.74403	0.002761	common
SLC18A2	-4.54612	0.003129	-4.42014	0.003959	common
FGF7	-4.5445	0.003143	-0.0810527	1	KO negative
WEE1	-4.53906	0.003177	-0.181609	1	KO negative
AQP8	-4.53594	0.003184	-4.85075	0.002589	common
POLRMT	-4.53456	0.003184	-0.126796	1	KO negative
VARS2	-4.5251	0.003237	-0.385166	1	KO negative
SMG6	-4.52431	0.003244	0.208064	1	KO negative
DR1	-4.52431	0.003244	-0.0696624	1	KO negative
BPIFB1	-4.51365	0.003337	-0.0631747	1	KO negative
CHD1	-4.51087	0.003369	0.260293	1	KO negative
COL2A1	-4.49609	0.003521	-0.440704	1	KO negative
SLC20A1	-4.47973	0.003671	-2.63833	0.079674	KO negative
NAA10	-4.47431	0.003723	0.861697	0.953547	KO negative
KAT2A	-4.46543	0.003892	-1.19111	0.935372	KO negative
COL6A1	-4.45976	0.003923	-0.679501	1	KO negative
ECM1	-4.45661	0.003955	-0.0250878	1	KO negative
KCNK12	-4.445	0.004083	-5.24019	0.001814	common
WNT7A	-4.44277	0.004095	-0.127209	1	KO negative
PDDC1	-4.43833	0.004125	0	1	KO negative
TUFT1	-4.43322	0.004156	-0.981341	1	KO negative
USP37	-4.42562	0.004236	-0.562186	1	KO negative
MTPAP	-4.42504	0.004236	-0.228177	1	KO negative
SLC35A2	-4.42082	0.004247	-5.55089	0.001699	common
SDHB	-4.41846	0.004258	0.627254	1	KO negative
DDX1	-4.41097	0.004346	0.107505	1	KO negative
SLC25A48	-4.4041	0.004433	-4.74323	0.002761	common
EEF1A1	-4.39965	0.004463	-1.46847	0.602904	KO negative
SCN1B	-4.3973	0.004474	-5.19351	0.001814	common
MBTPS1	-4.38409	0.004655	-1.1383	0.989572	KO negative
RRM2	-4.36258	0.004912	0.074657	1	KO negative
ASB6	-4.35691	0.004941	-0.189646	1	KO negative
TRNT1	-4.35312	0.005007	-0.101352	1	KO negative
GFER	-4.35131	0.005036	1.23448	0.656206	KO negative
LTB4R	-4.34873	0.005045	-5.35769	0.001761	common
SARS2	-4.33682	0.005129	-0.0875282	1	KO negative
COPB2	-4.33251	0.005176	2.98877	0.112416	KO negative
OR10V1	-4.3316	0.005185	-5.74999	0.001544	common
COL10A1	-4.32564	0.005266	-0.0432123	1	KO negative
PTK2	-4.32458	0.005266	-0.0933095	1	KO negative
SLC25A34	-4.32352	0.005266	-3.05042	0.038986	KO negative
SCNM1	-4.32245	0.005266	-4.51892	0.003222	common
CAD	-4.32136	0.005266	0.0911773	1	KO negative
OR10AD1	-4.31057	0.005358	-2.07452	0.224735	KO negative
KCNN4	-4.30994	0.005358	-3.80816	0.011869	common
SETDB1	-4.30917	0.005366	-2.31159	0.144292	KO negative
BEST1	-4.30781	0.005375	-3.11758	0.035258	KO negative
EEF2KMT	-4.30571	0.00542	0	1	KO negative
PIK3C3	-4.30296	0.005445	-0.679501	1	KO negative
SDC1	-4.30169	0.005445	-0.747705	1	KO negative
OR4C12	-4.30105	0.005445	-4.56043	0.003176	common
DIDO1	-4.29734	0.005471	-0.607602	1	KO negative
DPF2	-4.29397	0.005498	-0.133163	1	KO negative
MFAP5	-4.28991	0.005542	-0.0865995	1	KO negative
PPP4C	-4.28778	0.005568	-0.052189	1	KO negative
HARS2	-4.28657	0.005585	-0.850504	1	KO negative
KCNIP3	-4.28026	0.005711	-4.55826	0.003176	common
CLEC18B	-4.27797	0.005718	-0.110698	1	KO negative
SLC25A35	-4.26503	0.005888	-3.83517	0.011355	common
MCM3AP	-4.26317	0.00591	-0.217391	1	KO negative
PDCD6IP	-4.26025	0.00591	-1.12391	0.999956	KO negative
RFT1	-4.25858	0.00591	0.946883	0.882838	KO negative
KMT5A	-4.25486	0.005942	0	1	KO negative
GART	-4.25263	0.005964	-1.02616	1	KO negative
AQP9	-4.24907	0.005964	-3.28521	0.027994	KO negative
LCN6	-4.24824	0.005964	-1.00074	1	KO negative
NPY4R	-4.24432	0.005989	-3.60088	0.015959	common
TRPV2	-4.24225	0.005996	-3.72837	0.013418	common
HMGB1	-4.24102	0.006002	-0.42807	1	KO negative
HSPB6	-4.23443	0.006087	-0.230113	1	KO negative
ITIH3	-4.23423	0.006087	-0.143253	1	KO negative
SLC11A2	-4.23073	0.006094	-4.99025	0.002589	common
ELAC2	-4.22898	0.0061	0.197199	1	KO negative
SPNS1	-4.22215	0.00616	-1.1214	1	KO negative
NUS1	-4.21968	0.006166	1.92133	0.329753	KO negative
BRCA1	-4.21533	0.00619	-0.206762	1	KO negative
NBL1	-4.20918	0.006232	-1.14286	0.985253	KO negative
S1PR5	-4.20662	0.006256	-3.0171	0.041062	KO negative
SLCO4A1	-4.20438	0.006297	-4.69467	0.003028	common
SLC13A2	-4.20235	0.00632	-3.16471	0.033093	KO negative
CCL19	-4.19972	0.006374	-0.104611	1	KO negative
SLC5A5	-4.19911	0.006374	-3.23502	0.030018	KO negative
TEX264	-4.1987	0.006374	-0.428221	1	KO negative
CGB1	-4.19597	0.006397	-0.0653602	1	KO negative
TRIP12	-4.18697	0.006506	-0.235338	1	KO negative
PHF12	-4.18284	0.006546	-0.12222	1	KO negative
SAP130	-4.17839	0.006575	-0.744921	1	KO negative
ITIH4	-4.17805	0.006575	-0.217391	1	KO negative
NSUN4	-4.16987	0.006586	0.181814	1	KO negative
APOC1	-4.16967	0.006586	-0.066371	1	KO negative
CILP	-4.15606	0.006847	-0.0685777	1	KO negative
VPS25	-4.1559	0.006853	2.39437	0.193508	KO negative
BPIFB2	-4.15467	0.006875	0.0499663	1	KO negative
COL9A3	-4.15069	0.00688	-1.2614	0.856488	KO negative
UBE2D3	-4.14976	0.006902	0.206098	1	KO negative
MCOLN2	-4.14739	0.006907	-3.19155	0.031923	KO negative
C6orf120	-4.14234	0.006929	-1.12026	1	KO negative
CTF1	-4.13619	0.006984	-0.0607154	1	KO negative
SLC15A3	-4.13518	0.006989	-3.35611	0.024978	KO negative
RABGGTA	-4.13176	0.007016	0.455064	1	KO negative
FEN1	-4.13039	0.007016	0.251835	1	KO negative
SLC12A8	-4.12947	0.007038	-5.49111	0.001718	common
SCGB1C2	-4.12293	0.005917	0	1	KO negative
GPHB5	-4.12001	0.007135	-0.032176	1	KO negative
ABCG5	-4.11981	0.007135	-3.12637	0.034836	KO negative
GUCA2A	-4.11942	0.007135	-0.0256956	1	KO negative
NFYB	-4.11716	0.007156	-0.133583	1	KO negative
PGLYRP1	-4.11235	0.007211	-1.37268	0.712211	KO negative
GPBAR1	-4.10177	0.007405	-5.66845	0.001544	common
KCNK7	-4.10041	0.007405	-2.20609	0.175575	KO negative
RAD1	-4.09943	0.007405	0.251115	1	KO negative
ATP2A2	-4.09771	0.007426	0.191465	1	KO negative
KCNJ14	-4.08911	0.007594	-4.71589	0.002908	common
AQP11	-4.08716	0.007598	-1.10276	1	KO negative
XPNPEP1	-4.08677	0.007602	-0.644338	1	KO negative
OTOG	-4.08386	0.007687	1.44175	0.53364	KO negative
PRSS8	-4.08153	0.007691	-4.35589	0.004563	common
SCNN1A	-4.0796	0.007711	-1.96114	0.271991	KO negative
CHRM4	-4.07708	0.007731	-3.357	0.024978	KO negative
DRD3	-4.07418	0.007815	-3.16976	0.032934	KO negative
PPP6C	-4.07051	0.007948	-0.238313	1	KO negative
NAPA	-4.06883	0.008	0.762833	1	KO negative
CHADL	-4.06511	0.008052	-1.27404	0.838692	KO negative
KCNC3	-4.06415	0.008071	-3.71483	0.013697	common
DSCAM	-4.05492	0.008251	-0.0938967	1	KO negative
AMD1	-4.0541	0.008254	0.256624	1	KO negative
GPR61	-4.04917	0.008401	-3.19094	0.031952	KO negative
SLC5A1	-4.04821	0.008403	-2.97564	0.043581	KO negative
KCNJ9	-4.04381	0.008485	-3.4877	0.019723	common
ABCA4	-4.04305	0.008488	-4.62086	0.003059	common
IPO7	-4.04044	0.008562	-5.5772	0.001566	common
SLC25A20	-4.03618	0.008622	-4.54188	0.003176	common
GPI	-4.03617	0.008622	0.666371	1	KO negative
SLC35E3	-4.03428	0.00864	-4.95865	0.002589	common
EREG	-4.03085	0.008697	-0.0426945	1	KO negative
NSMCE1	-4.03057	0.008697	-0.158146	1	KO negative
LARS2	-4.02874	0.008697	0.382549	1	KO negative
SLC39A5	-4.02857	0.008697	-4.51165	0.003322	common
NFYA	-4.02815	0.008697	-0.154356	1	KO negative
SEPHS2	-4.02798	0.008699	-0.7509	1	KO negative
MMRN2	-4.01839	0.008828	-0.0955495	1	KO negative
RPP40	-4.01815	0.008828	0.47502	1	KO negative
MFN2	-4.0138	0.008892	1.49196	0.511792	KO negative
OR2AT4	-4.0104	0.008895	-3.66286	0.014884	common
SLC16A13	-4.01021	0.008895	-3.61771	0.015652	common
DHODH	-4.00644	0.00893	0.0946575	1	KO negative
GPR182	-4.00531	0.00893	-1.9509	0.276965	KO negative
SLC17A7	-4.00164	0.008978	-2.97638	0.043562	KO negative
BEST3	-4.00042	0.008995	-3.18338	0.032315	KO negative
HDAC3	-3.99366	0.009259	-0.14439	1	KO negative
ALG11	-3.99085	0.00926	0.257589	1	KO negative
SDF2	-3.98414	0.009401	-0.0723628	1	KO negative
RACGAP1	-3.98405	0.009401	0.886725	0.93207	KO negative
CKLF	-3.9791	0.009464	-0.0728145	1	KO negative
SRCAP	-3.97906	0.009464	0.162184	1	KO negative
CXCL16	-3.97889	0.009464	0.134298	1	KO negative
KCNC4	-3.97836	0.009465	-4.19185	0.005876	common
MDK	-3.97667	0.009513	-0.283412	1	KO negative
CXCL12	-3.97572	0.009513	-0.157896	1	KO negative
SHBG	-3.97535	0.009513	-0.062447	1	KO negative
SLC39A11	-3.97237	0.009544	-3.95668	0.009011	common
SCGB1C1	-3.96162	0.009711	-0.104644	1	KO negative
FST	-3.95609	0.009848	-0.130633	1	KO negative
MEPE	-3.95495	0.009863	-0.217391	1	KO negative
NUP155	-3.95362	0.009863	2.58336	0.165285	KO negative
C6orf58	-3.95164	0.009939	-0.0222764	1	KO negative
IL27	-3.94962	0.010014	-0.0270154	1	KO negative
OTOL1	-3.94815	0.010089	-0.0635818	1	KO negative
INHBB	-3.94558	0.010119	-0.217391	1	KO negative
SLC25A44	-3.94447	0.010119	-5.83854	0.001544	common
KDM2A	-3.93938	0.010208	-0.151331	1	KO negative
AMH	-3.93181	0.010432	-0.0913702	1	KO negative
CLCC1	-3.92871	0.010461	-2.46245	0.109557	KO negative
PYROXD1	-3.9242	0.01055	0.16353	1	KO negative
CACNB3	-3.91991	0.010668	-5.05248	0.00225	common
IL1F10	-3.91664	0.010756	-0.14236	1	KO negative
METTL14	-3.91403	0.010844	0.521982	1	KO negative
KCNK18	-3.91176	0.010901	-2.06593	0.228021	KO negative
OR5AU1	-3.90721	0.010974	-3.66932	0.014767	common
CTNS	-3.90104	0.011105	-4.8628	0.002571	common
LTB4R2	-3.89695	0.011124	-5.22204	0.001814	common
RBP4	-3.89473	0.011124	-0.113329	1	KO negative
CLCN7	-3.89384	0.011124	-4.80546	0.002589	common
NMS	-3.89347	0.011124	-1.18358	0.944816	KO negative
SLC7A5	-3.8933	0.011124	-4.42404	0.003932	common
CSTL1	-3.89276	0.011124	-0.189129	1	KO negative
PFAS	-3.89096	0.011133	-0.679501	1	KO negative
KCNK4	-3.89076	0.011133	-2.59549	0.086097	KO negative
SLC5A11	-3.89039	0.011133	-3.11857	0.035214	KO negative
SLC35G1	-3.88609	0.011275	-3.38653	0.023891	KO negative
GPR142	-3.88529	0.011275	-3.0371	0.039889	KO negative
KCNK15	-3.88306	0.011285	-5.48455	0.001718	common
PTGDR2	-3.88303	0.011285	-2.40372	0.121295	KO negative
SEMA3A	-3.88124	0.011312	-0.146868	1	KO negative
TRPV4	-3.87458	0.011513	-4.87821	0.002589	common
NCAN	-3.87371	0.011525	-1.05874	1	KO negative
PGM3	-3.87047	0.011623	0.0943768	1	KO negative
NTN1	-3.86886	0.011693	-0.143779	1	KO negative
SEMA3C	-3.86423	0.011797	-1.59982	0.484456	KO negative
LEFTY2	-3.86388	0.011797	-0.142945	1	KO negative
KCNK6	-3.86353	0.011797	-5.41413	0.001718	common
ELN	-3.86334	0.011797	0.255269	1	KO negative
DDX11	-3.8622	0.011808	0.241096	1	KO negative
COL16A1	-3.86031	0.01182	-0.146764	1	KO negative
DHX30	-3.85692	0.0119	0.125512	1	KO negative
SBSN	-3.85677	0.0119	0.0227155	1	KO negative
TRPC4AP	-3.85496	0.011911	-3.116	0.035296	KO negative
ZP3	-3.84823	0.012086	-0.0947926	1	KO negative
PIEZO1	-3.84805	0.012086	-3.76868	0.012649	common
TOR2A	-3.84771	0.012086	-0.0353963	1	KO negative
OR2AP1	-3.84683	0.012111	-2.97547	0.043581	KO negative
EPGN	-3.84521	0.012144	-0.824546	1	KO negative
USP8	-3.84394	0.012144	-0.117846	1	KO negative
SLC16A1	-3.84345	0.012144	-4.68407	0.00304	common
CSF3R	-3.83974	0.012211	-0.0503417	1	KO negative
DHX36	-3.83203	0.012348	1.33563	0.591825	KO negative
OR51I2	-3.8274	0.012401	-2.19585	0.178908	KO negative
NPTX2	-3.82405	0.012519	-0.0997257	1	KO negative
CCDC70	-3.82353	0.012519	-0.15799	1	KO negative
SLC16A8	-3.82229	0.01253	-1.09812	1	KO negative
SOD2	-3.8195	0.012606	0.157584	1	KO negative
GTF3C6	-3.81921	0.012606	-0.125884	1	KO negative
CST6	-3.81073	0.012824	-0.0706935	1	KO negative
DCPS	-3.80621	0.013	0.211612	1	KO negative
DHFR	-3.80513	0.013024	0.387004	1	KO negative
FFAR2	-3.80255	0.013084	-3.21069	0.030927	KO negative
USB1	-3.80178	0.013084	0.265432	1	KO negative
RTEL1	-3.79975	0.013128	0.131503	1	KO negative
VEGFA	-3.79664	0.013199	-0.201861	1	KO negative
TAP1	-3.79577	0.013204	-0.859209	0.910863	KO negative
IL25	-3.79566	0.013204	-0.0169197	1	KO negative
CLCN6	-3.7935	0.013222	-3.17119	0.032906	KO negative
HTR6	-3.79282	0.013222	-1.58603	0.495986	KO negative
TSG101	-3.79142	0.013245	1.49686	0.51058	KO negative
LAMC3	-3.78397	0.01339	-0.178401	1	KO negative
WNT10B	-3.78034	0.01349	-0.0396815	1	KO negative
ABHD17A	-3.77984	0.01349	0.201011	1	KO negative
ARTN	-3.77932	0.013498	-0.0172721	1	KO negative
C1QTNF9	-3.77773	0.01352	-0.0618958	1	KO negative
KCNH6	-3.7743	0.013665	-4.09729	0.006664	common
MDM4	-3.77201	0.013714	-0.235772	1	KO negative
C22orf46	-3.7695	0.013717	-0.596879	1	KO negative
SUDS3	-3.76935	0.013717	-0.217391	1	KO negative
SLC25A18	-3.76751	0.013725	-3.92628	0.009433	common
IL9R	-3.76465	0.013801	-0.111641	1	KO negative
KCNA7	-3.7585	0.01397	-2.48907	0.104317	KO negative
SLC35E1	-3.75783	0.013978	-4.18023	0.005933	common
WNT16	-3.75577	0.014	-0.0698664	1	KO negative
IGFBP6	-3.75252	0.014034	-0.0975021	1	KO negative
KCNJ12	-3.7519	0.014042	-5.43063	0.001718	common
FAM20A	-3.75149	0.01405	-0.0508296	1	KO negative
PLA2R1	-3.74995	0.014098	-0.121518	1	KO negative
SFTPB	-3.74127	0.014465	-0.042843	1	KO negative
MUC5B	-3.74007	0.014481	-0.113679	1	KO negative
FBLN1	-3.73838	0.014481	-0.167759	1	KO negative
OR11H4	-3.73719	0.014481	-4.7018	0.002998	common
ZBTB7A	-3.73691	0.014481	-2.06221	0.229383	KO negative
GPR162	-3.73613	0.014481	-2.29811	0.147245	KO negative
CNGA1	-3.73582	0.014481	-3.09266	0.036629	KO negative
C1QTNF4	-3.73363	0.014541	-0.786349	1	KO negative
PTHLH	-3.73278	0.014555	0.0591748	1	KO negative
PROK1	-3.73142	0.014568	0.0981005	1	KO negative
FAM3C	-3.7282	0.014616	-0.861035	1	KO negative
SLC33A1	-3.72786	0.014616	-4.06938	0.007015	common
KCTD11	-3.72735	0.014616	-4.74091	0.002765	common
GPR22	-3.72651	0.014616	-2.4353	0.114722	KO negative
GABPA	-3.72582	0.014616	-0.107388	1	KO negative
COL17A1	-3.71688	0.01493	-0.0333468	1	KO negative
LAD1	-3.71519	0.01493	-0.0612152	1	KO negative
SLC7A10	-3.70981	0.01504	-4.93874	0.002589	common
SPNS2	-3.70679	0.015125	-5.31987	0.001775	common
SLC6A20	-3.70259	0.015293	-2.66262	0.075985	KO negative
PSMC1	-3.70257	0.015293	2.37931	0.197542	KO negative
ASGR1	-3.70008	0.015376	-0.205261	1	KO negative
LBP	-3.69958	0.015382	-0.986615	1	KO negative
SPON2	-3.69873	0.015388	-0.0827256	1	KO negative
IL17F	-3.69607	0.015404	-0.0691426	1	KO negative
XPO6	-3.69562	0.015404	-3.1791	0.032461	KO negative
IGFBPL1	-3.69461	0.015404	-0.0429389	1	KO negative
SLC6A7	-3.69456	0.015404	-2.0608	0.229831	KO negative
TNFSF12	-3.69409	0.015404	-0.106843	1	KO negative
CRTAP	-3.69188	0.015425	-0.259779	1	KO negative
PDZK1	-3.69022	0.015425	-4.23354	0.005591	common
MED28	-3.68971	0.015425	1.85106	0.356376	KO negative
LY6G5C	-3.68888	0.015425	-0.217391	1	KO negative
SLC25A19	-3.68822	0.015425	-4.18355	0.005895	common
PRF1	-3.68806	0.015425	1.307	0.608878	KO negative
BPIFB4	-3.68706	0.015443	-0.11413	1	KO negative
RARS2	-3.67776	0.015817	0.788026	1	KO negative
NAA30	-3.67702	0.015823	0.166541	1	KO negative
USP14	-3.67551	0.01584	-0.152064	1	KO negative
CATSPER4	-3.67409	0.015883	-5.14737	0.001814	common
OR5D18	-3.66961	0.016007	-3.06613	0.038263	KO negative
S1PR4	-3.66565	0.0161	-2.62926	0.081073	KO negative
COL4A6	-3.66119	0.016231	0.218676	1	KO negative
XPO7	-3.66069	0.01624	-5.05248	0.00225	common
SLC22A6	-3.65954	0.01624	-3.33535	0.025753	KO negative
SENP3	-3.65789	0.016282	-0.768148	1	KO negative
PPP1CA	-3.65657	0.016324	-0.631825	1	KO negative
SPINT1	-3.65212	0.016454	-0.0940962	1	KO negative
CRH	-3.64637	0.01655	-0.0679272	1	KO negative
NDUFS8	-3.64622	0.01655	0.28957	1	KO negative
GKN1	-3.64098	0.016678	-0.61343	1	KO negative
WISP2	-3.64015	0.016695	-0.238486	1	KO negative
OSCAR	-3.63361	0.016873	-0.0509224	1	KO negative
AMBP	-3.62921	0.016982	-0.082232	1	KO negative
CEACAM16	-3.62401	0.01728	-0.0930619	1	KO negative
MATN4	-3.62319	0.01728	0.0484488	1	KO negative
ARL6IP5	-3.6214	0.017287	-3.00829	0.041497	KO negative
CPXM2	-3.62124	0.017287	-0.152131	1	KO negative
UBE2C	-3.61833	0.017364	1.61818	0.458868	KO negative
NDUFV1	-3.60714	0.017811	0.243227	1	KO negative
CLPB	-3.60307	0.017887	0.0662293	1	KO negative
GNPNAT1	-3.60053	0.018037	0.494945	1	KO negative
SLC27A3	-3.59602	0.018164	-3.64873	0.015174	common
SLC39A9	-3.59537	0.018164	-3.72809	0.013418	common
TSKU	-3.59472	0.018203	-0.150114	1	KO negative
MOCS3	-3.59404	0.018217	-0.135501	1	KO negative
FGF9	-3.59215	0.018329	-0.301499	1	KO negative
TRAF7	-3.59071	0.018357	-0.125971	1	KO negative
OR5J2	-3.58943	0.018357	-4.83298	0.002589	common
C3	-3.5859	0.01842	2.46471	0.182941	KO negative
AQP3	-3.58301	0.01852	-9.42534	0.000309	common
C1QL2	-3.58286	0.01852	-0.0773939	1	KO negative
KCNA6	-3.58221	0.018523	-4.96827	0.002589	common
FANCL	-3.58206	0.018523	-0.131038	1	KO negative
CATSPER3	-3.5811	0.018586	-4.04163	0.007489	common
ABCA3	-3.5795	0.018613	-3.13045	0.034723	KO negative
CX3CL1	-3.57917	0.018613	-0.102417	1	KO negative
SLC26A9	-3.5763	0.018711	-5.63281	0.001544	common
SLC2A8	-3.57471	0.018748	-3.62749	0.015538	common
SSTR3	-3.57183	0.018775	-4.54861	0.003176	common
POLG	-3.57167	0.018775	-0.126517	1	KO negative
PELP1	-3.56944	0.018819	0.327736	1	KO negative
TRPC7	-3.56801	0.018819	-3.31588	0.026716	KO negative
OR5D13	-3.5669	0.018819	-4.92172	0.002589	common
TMC1	-3.56498	0.018819	-2.1984	0.178174	KO negative
VPRBP	-3.56435	0.018819	0	1	KO negative
CCL1	-3.56419	0.018819	-0.0278851	1	KO negative
GPR19	-3.56307	0.01882	-5.13347	0.001814	common
SLC25A11	-3.56269	0.018821	-3.19771	0.031542	KO negative
SSC5D	-3.5607	0.018989	-0.116674	1	KO negative
SLC25A5	-3.55867	0.019037	-5.99217	0.00121	common
NPNT	-3.55309	0.019323	-0.0852074	1	KO negative
LGALS7	-3.55278	0.019323	-0.122444	1	KO negative
IL22	-3.55245	0.019323	-0.111281	1	KO negative
ABHD18	-3.54914	0.019418	0	1	KO negative
GNPTG	-3.54818	0.019434	-0.148442	1	KO negative
IL36RN	-3.5474	0.019434	-0.0642862	1	KO negative
OR5A2	-3.54642	0.019434	-2.29811	0.147245	KO negative
BPI	-3.54534	0.019434	0.0981985	1	KO negative
BCLAF1	-3.54407	0.019434	-0.306906	1	KO negative
TCN2	-3.54392	0.019434	-3.95845	0.009009	common
SLC31A1	-3.54377	0.019434	-4.59843	0.003165	common
C1orf56	-3.5436	0.019434	-0.136582	1	KO negative
IGSF21	-3.54062	0.019493	-0.377154	1	KO negative
WARS2	-3.53823	0.01954	0.275167	1	KO negative
NUCB1	-3.53511	0.019703	-0.184051	1	KO negative
CREG1	-3.53118	0.019831	-0.143966	1	KO negative
F2R	-3.53102	0.019831	-3.6862	0.014312	common
SLC3A2	-3.52843	0.019947	-6.8036	0.000309	common
MUC1	-3.52704	0.020016	-0.125988	1	not significant
TECTB	-3.5254	0.02005	0.0146499	1	not significant
CLIC6	-3.52523	0.02005	-2.43929	0.113723	not significant
LRRC8C	-3.52445	0.02005	-4.52083	0.003221	AC negative
SLPI	-3.52169	0.020154	-0.0820903	1	not significant
SLC6A17	-3.52127	0.020154	-4.42266	0.003932	AC negative
QRFP	-3.51757	0.020314	-0.409749	1	not significant
SLC18A3	-3.51522	0.020359	-3.74227	0.013208	AC negative
KCNN1	-3.51506	0.020359	-5.49802	0.001718	AC negative
SLC25A23	-3.51221	0.020404	-3.14241	0.033863	not significant
MATN3	-3.50977	0.02046	-0.058265	1	not significant
OR13D1	-3.50961	0.02046	-3.08275	0.037206	not significant
BPIFB3	-3.50822	0.020482	-0.196174	1	not significant
INHA	-3.50541	0.020561	-0.217391	1	not significant
IGFBP7	-3.50464	0.020595	-0.679501	1	not significant
SLC1A5	-3.50214	0.020708	-3.97041	0.008828	AC negative
GALR3	-3.49595	0.021003	-3.29919	0.027186	not significant
OIT3	-3.49471	0.021057	-0.126517	1	not significant
GAK	-3.49448	0.021057	-0.0896211	1	not significant
KCNG3	-3.49317	0.021101	-2.43132	0.11524	not significant
SV2C	-3.49177	0.021141	-4.87765	0.002589	AC negative
TNN	-3.49054	0.021141	0.353243	1	not significant
BRAP	-3.49023	0.021141	-0.624611	1	not significant
METTL3	-3.48963	0.021161	0.127424	1	not significant
POLG2	-3.48929	0.021161	-0.0377112	1	not significant
WNT8B	-3.48812	0.021216	0.0198011	1	not significant
RNF126	-3.48421	0.021405	-0.204843	1	not significant
HTR3A	-3.4802	0.021499	-1.06051	1	not significant
PTGER4	-3.47897	0.021499	-4.59329	0.003165	AC negative
KCND3	-3.47821	0.021499	-4.88817	0.002589	AC negative
HECTD1	-3.47809	0.021499	-0.517055	1	not significant
TACR2	-3.47759	0.021508	-4.63831	0.003054	AC negative
CCR10	-3.47651	0.02154	-2.02429	0.244442	not significant
SLC48A1	-3.4759	0.021549	-5.4425	0.001718	AC negative
HAMP	-3.4722	0.021617	-0.0408345	1	not significant
HMCN2	-3.47191	0.021617	-0.103672	1	not significant
SLC26A4	-3.47144	0.021617	-5.33513	0.001775	AC negative
PCDHA1	-3.47083	0.021617	-0.0217327	1	not significant
MUC3A	-3.47069	0.021617	-0.177662	1	not significant
SCGB1A1	-3.46992	0.021659	-0.0403005	1	not significant
WFDC1	-3.46474	0.021932	-0.0797201	1	not significant
SLC30A7	-3.46471	0.021932	-5.88716	0.001544	AC negative
NARS2	-3.46046	0.022172	0.373547	1	not significant
NUP85	-3.45821	0.022252	2.76723	0.137764	not significant
ABCC2	-3.45676	0.022277	-2.39807	0.122578	not significant
SSC4D	-3.45539	0.022308	0	1	not significant
SLC38A7	-3.45264	0.022481	-5.1929	0.001814	AC negative
FLRT3	-3.45204	0.022489	-1.09657	1	not significant
TFPI	-3.45083	0.022505	-0.112068	1	not significant
TMC8	-3.45052	0.022505	-3.7618	0.012764	AC negative
MFSD9	-3.44945	0.022529	-2.94827	0.03929	not significant
CA11	-3.44879	0.022529	-1.04905	1	not significant
NOG	-3.44809	0.022529	-0.130463	1	not significant
UCN2	-3.44534	0.022624	-0.0509517	1	not significant
SLC6A12	-3.44231	0.0227	-2.11114	0.21021	not significant
IGFBP1	-3.4414	0.0227	-0.119004	1	not significant
DRD4	-3.44126	0.0227	-4.64923	0.003054	AC negative
SIGLEC10	-3.44049	0.0227	-0.138077	1	not significant
SFRP1	-3.44003	0.0227	-1.0023	1	not significant
KCNQ4	-3.43989	0.0227	-3.67813	0.01457	AC negative
MSMB	-3.43958	0.0227	0.106827	1	not significant
FCER2	-3.43459	0.022859	0.0345067	1	not significant
NHLRC3	-3.43383	0.022866	-1.07896	1	not significant
RTBDN	-3.42875	0.023065	-0.0902996	1	not significant
FGFBP3	-3.4284	0.023065	-0.297242	1	not significant
CACNA1G	-3.42749	0.023072	-4.94854	0.002589	AC negative
FAM19A3	-3.42654	0.023079	-0.0748582	1	not significant
NXPH2	-3.42463	0.023104	-0.230313	1	not significant
IGLON5	-3.42448	0.023104	-0.456951	1	not significant
OR11H6	-3.41845	0.023247	-3.05481	0.038897	not significant
SOGA1	-3.41836	0.023247	-0.0614453	1	not significant
SLC12A4	-3.4165	0.023293	-4.71999	0.002905	AC negative
BAP1	-3.41616	0.023293	-2.058	0.230464	not significant
CARTPT	-3.41125	0.023503	-0.0929812	1	not significant
PSORS1C2	-3.40991	0.02358	-0.101653	1	not significant
OR4D6	-3.4096	0.02358	-4.67487	0.003054	AC negative
OPN1SW	-3.40915	0.023597	-3.26451	0.028568	not significant
SLC36A2	-3.40646	0.023738	-4.50515	0.003372	AC negative
LPAR3	-3.40616	0.023738	2.48986	0.177595	not significant
ADRA2A	-3.40503	0.023783	-3.26027	0.028961	not significant
MAGT1	-3.40451	0.023783	-3.225	0.030471	not significant
FAM3D	-3.40123	0.02399	-0.05915	1	not significant
MUC20	-3.3975	0.024102	-0.0890503	1	not significant
ASNA1	-3.39678	0.024118	2.06956	0.280374	not significant
MFSD1	-3.39586	0.02413	-1.72214	0.396292	not significant
TMEM38B	-3.39556	0.02413	-4.86976	0.002589	AC negative
HCAR1	-3.39466	0.024136	-3.08528	0.037066	not significant
TPCN2	-3.39333	0.024216	-3.60839	0.01582	AC negative
MYOC	-3.39303	0.024216	-0.139848	1	not significant
KCNG4	-3.38976	0.024374	-2.20935	0.174454	not significant
OR2A25	-3.38871	0.024402	-2.05955	0.230324	not significant
GPR20	-3.38856	0.024402	-2.24708	0.162893	not significant
CACNB1	-3.38827	0.024402	-2.70406	0.070099	not significant
BMP3	-3.38619	0.024423	-0.935804	1	not significant
OR9Q1	-3.38598	0.024423	-4.63052	0.003054	AC negative
SLC35G6	-3.3847	0.024481	0	1	not significant
SEMA3E	-3.38382	0.024508	-0.0905938	1	not significant
FGF19	-3.38308	0.024513	-0.753034	1	not significant
CXADR	-3.37952	0.024706	-1.0648	1	not significant
C1QTNF5	-3.37848	0.024732	-0.0558234	1	not significant
P2RY6	-3.37641	0.02481	-2.37394	0.127992	not significant
SLC9A3R1	-3.37375	0.024872	-4.05188	0.007317	AC negative
COL6A5	-3.3736	0.024872	-0.0216003	1	not significant
SLC8A2	-3.37123	0.02497	-3.57551	0.016756	AC negative
ABCF2	-3.37063	0.024985	-4.17363	0.005951	AC negative
FBLN5	-3.36977	0.025	-0.0739098	1	not significant
CST7	-3.36918	0.025	-0.079084	1	not significant
VEGFB	-3.36902	0.025	-0.164436	1	not significant
C12orf49	-3.36785	0.025077	-0.127331	1	not significant
NPFFR1	-3.36357	0.025286	-4.62731	0.003054	AC negative
VWCE	-3.36298	0.025286	-0.0438988	1	not significant
TRIM37	-3.36284	0.025286	-0.156935	1	not significant
CLIC1	-3.35561	0.025684	-5.0507	0.00225	AC negative
OR9G4	-3.35549	0.025684	-3.02594	0.040579	not significant
ARID4B	-3.35347	0.02578	-0.14766	1	not significant
KCNH4	-3.35155	0.02579	-4.49806	0.003426	AC negative
C11orf94	-3.35139	0.02579	-0.0187025	1	not significant
OR1I1	-3.3508	0.02579	-4.5779	0.003165	AC negative
CRLS1	-3.35021	0.02579	-0.170002	1	not significant
ABCC9	-3.34933	0.02579	-3.32068	0.026465	not significant
MIP	-3.34787	0.025829	-1.75188	0.378788	not significant
SERPINA5	-3.34714	0.025829	-0.0228482	1	not significant
LRCH3	-3.34422	0.025922	-0.0363821	1	not significant
CPN2	-3.34407	0.025922	-0.133016	1	not significant
CLIC5	-3.34349	0.025922	-2.0887	0.219279	not significant
OR7G3	-3.34232	0.02598	0	1	not significant
GPR26	-3.34217	0.02598	-3.03274	0.040176	not significant
PROKR2	-3.34086	0.025994	-5.05248	0.00225	AC negative
CD63	-3.34043	0.025994	-0.0904761	1	not significant
TTYH3	-3.33969	0.025994	-3.98813	0.008467	AC negative
OSTM1	-3.3394	0.025994	-4.66605	0.003054	AC negative
OR9Q2	-3.33853	0.025994	-4.53491	0.003176	AC negative
RPP14	-3.33788	0.025994	0.0631848	1	not significant
LIFR	-3.33766	0.025994	-0.134014	1	not significant
APOM	-3.33751	0.025994	-0.202712	1	not significant
OMD	-3.33707	0.025994	0.0328734	1	not significant
FNDC7	-3.33605	0.026088	-0.0872414	1	not significant
OLFM2	-3.3346	0.026181	-0.091708	1	not significant
TREM1	-3.33169	0.026344	-0.0864298	1	not significant
NTSR1	-3.33066	0.026371	-3.65488	0.01502	AC negative
OR10P1	-3.33023	0.026371	-4.56649	0.003165	AC negative
GTF2E2	-3.32978	0.026371	-0.104467	1	not significant
DKK4	-3.32969	0.026371	-0.0433802	1	not significant
DPH1	-3.32878	0.026371	0.419577	1	not significant
NTN5	-3.32748	0.026375	-0.829738	1	not significant
SETD2	-3.32544	0.026421	-0.0972413	1	not significant
GPR15	-3.32501	0.026421	-4.5137	0.003291	AC negative
COASY	-3.32432	0.026444	-0.217391	1	not significant
OR5D14	-3.32355	0.026457	-1.28266	0.829016	not significant
SLC25A41	-3.32153	0.026549	-3.27536	0.028314	not significant
LAMC2	-3.32023	0.026611	-0.217391	1	not significant
OR4C6	-3.31979	0.026624	-2.9751	0.043596	not significant
LAMB2	-3.3182	0.026726	-0.101006	1	not significant
BGLAP	-3.31776	0.026729	-1.03681	1	not significant
CRTAC1	-3.31719	0.026732	-0.7013	1	not significant
OR4N4	-3.31559	0.026831	-4.62011	0.003063	AC negative
SPX	-3.31516	0.026831	0	1	not significant
TNFRSF1B	-3.31502	0.026831	-0.119255	1	not significant
VCPIP1	-3.31473	0.026831	-2.16385	0.190233	not significant
C1QC	-3.31401	0.026854	0.685838	1	not significant
ABCC3	-3.31113	0.026923	-5.40964	0.001718	AC negative
HK2	-3.31098	0.026923	-0.131021	1	not significant
ANGPTL6	-3.31015	0.02693	-0.0758655	1	not significant
ABCG1	-3.30796	0.027011	-4.46638	0.003606	AC negative
SLC22A8	-3.30651	0.027048	-3.02972	0.040332	not significant
OR1D2	-3.30594	0.027048	-2.50776	0.100887	not significant
HRH2	-3.30565	0.027048	-3.60515	0.015881	AC negative
INTS2	-3.30527	0.027051	2.42694	0.189524	not significant
AMY1C	-3.30225	0.018819	0.17761	1	KO negative
PGLYRP3	-3.30205	0.027199	-0.0377349	1	not significant
AMBN	-3.30133	0.027211	-0.0521792	1	not significant
SLC25A16	-3.3009	0.027213	-6.20202	0.000798	AC negative
FXYD5	-3.30055	0.027225	-4.6283	0.003054	AC negative
MARCH9	-3.2991	0.027295	-0.260531	1	not significant
HSD17B10	-3.29806	0.027355	0.185752	1	not significant
CSF3	-3.29574	0.027447	-0.107766	1	not significant
ABCA2	-3.29559	0.027447	-3.8705	0.010318	AC negative
TTYH2	-3.29474	0.027497	-4.18421	0.005889	AC negative
CRP	-3.29273	0.027597	-0.0835303	1	not significant
RNASE9	-3.29244	0.027597	-0.0507955	1	not significant
TRPM3	-3.28629	0.027944	-3.1844	0.032266	not significant
OR1Q1	-3.28486	0.028042	-4.66126	0.003054	AC negative
USP21	-3.28215	0.028196	-0.605864	1	not significant
CDCP1	-3.28115	0.028198	-0.104097	1	not significant
LTBP3	-3.28016	0.028218	-0.0563027	1	not significant
SLC9B2	-3.27964	0.028258	-5.13829	0.001814	AC negative
PPIL4	-3.27868	0.028259	0.217936	1	not significant
SOST	-3.2783	0.028259	-0.643324	1	not significant
SLC22A16	-3.27737	0.028259	-3.82342	0.011612	AC negative
PDZD11	-3.27716	0.028259	-0.0778145	1	not significant
QRFPR	-3.27702	0.028259	-3.16531	0.033091	not significant
LCMT1	-3.27673	0.028259	1.51833	0.502868	not significant
NPEPPS	-3.27659	0.028259	-0.178146	1	not significant
TMEFF2	-3.27631	0.028259	-0.0553397	1	not significant
COL8A1	-3.27545	0.028261	-3.38541	0.023891	not significant
SLC38A9	-3.27474	0.028265	-2.47939	0.105939	not significant
SLC6A8	-3.27459	0.028265	-4.86838	0.002589	AC negative
SLC25A47	-3.27432	0.028265	-3.37126	0.02453	not significant
OPN5	-3.27361	0.028266	-3.37754	0.0243	not significant
SLCO2A1	-3.27204	0.028428	-4.97564	0.002589	AC negative
IL4R	-3.27142	0.028457	0.0748375	1	not significant
LRRC26	-3.26863	0.028619	-3.75975	0.012801	AC negative
NXPH3	-3.26849	0.028619	-1.77237	0.366986	not significant
KCNK13	-3.26664	0.028621	-2.39089	0.124197	not significant
ABCB11	-3.26651	0.028621	-1.55628	0.520105	not significant
CCL26	-3.26566	0.028672	-0.460723	1	not significant
EBI3	-3.26494	0.028672	-0.229111	1	not significant
KCNJ10	-3.26486	0.028672	-3.39286	0.023659	not significant
FLT3LG	-3.26466	0.028672	-0.139884	1	not significant
MATN1	-3.26313	0.028757	-0.0681812	1	not significant
CLCA2	-3.25914	0.029102	-4.54789	0.003176	AC negative
WISP1	-3.25801	0.029168	0.0272974	1	not significant
PPIL1	-3.25766	0.029168	1.49964	0.51058	not significant
ACAD9	-3.25702	0.029178	0.517555	1	not significant
F2RL2	-3.25434	0.029327	-5.25909	0.001814	AC negative
EPYC	-3.25392	0.029374	-0.05496	1	not significant
GPC2	-3.25349	0.02942	-0.12672	1	not significant
CXorf36	-3.25264	0.029421	-0.0676886	1	not significant
GDF15	-3.25208	0.029431	-0.784045	1	not significant
PLTP	-3.25124	0.029431	-0.0307612	1	not significant
PMCH	-3.25081	0.029431	-0.0272465	1	not significant
CAPG	-3.25019	0.029431	-0.0410493	1	not significant
SCN4A	-3.24884	0.02944	-5.14797	0.001814	AC negative
CD40	-3.24842	0.02945	-0.0868328	1	not significant
IL36A	-3.24493	0.029652	-0.0389493	1	not significant
FGF8	-3.24349	0.029708	-0.0889117	1	not significant
ESM1	-3.2425	0.029744	-0.217391	1	not significant
LYZL4	-3.24138	0.029744	-0.0915364	1	not significant
CACNG5	-3.24097	0.029744	-3.38992	0.023797	not significant
SLC22A17	-3.23858	0.029817	-2.05043	0.233245	not significant
GPR4	-3.2362	0.029936	-5.38841	0.001718	AC negative
SLC28A3	-3.23395	0.030036	-4.48933	0.003464	AC negative
MCOLN1	-3.23368	0.030036	-2.68146	0.073405	not significant
NTF4	-3.23293	0.030081	-0.094161	1	not significant
HTR2B	-3.23031	0.030244	-3.17971	0.032461	not significant
MGRN1	-3.22836	0.030316	-0.154455	1	not significant
GPR75	-3.22808	0.030316	-1.09995	1	not significant
CGB5	-3.22423	0.015964	-0.054492	1	KO negative
GNRHR	-3.22334	0.030588	-3.07617	0.037627	not significant
OR5A1	-3.22236	0.030623	-3.1724	0.032865	not significant
GPR62	-3.22068	0.030668	-5.68106	0.001544	AC negative
PTX3	-3.21797	0.030792	0.0778613	1	not significant
GATB	-3.21717	0.030792	0	1	not significant
VWA1	-3.21693	0.030792	-0.0430252	1	not significant
SLC38A3	-3.21651	0.030799	-4.65675	0.003054	AC negative
CHRDL2	-3.2154	0.030799	-0.718194	1	not significant
PSAP	-3.21151	0.030987	-0.136891	1	not significant
ANGPTL8	-3.21059	0.031022	0	1	not significant
LTBP4	-3.20984	0.031038	-0.311758	1	not significant
OR51T1	-3.20818	0.031082	-4.93092	0.002589	AC negative
NID1	-3.20582	0.031224	-0.551294	1	not significant
OR1N1	-3.20443	0.031304	-3.03123	0.040249	not significant
VWA2	-3.20343	0.03132	-0.146393	1	not significant
SLC25A10	-3.20185	0.031453	-4.97761	0.002589	AC negative
ADAM23	-3.20043	0.031478	-0.56062	1	not significant
EFEMP1	-3.19959	0.03153	-0.217391	1	not significant
TUB	-3.19862	0.031618	-0.0591251	1	not significant
ADRB3	-3.19656	0.031721	-5.27082	0.001814	AC negative
OR5D16	-3.19642	0.031721	-5.36295	0.001718	AC negative
ITLN1	-3.19532	0.031764	-0.270455	1	not significant
ULBP2	-3.19462	0.031798	-1.85824	0.322576	not significant
TADA2B	-3.19394	0.031823	-0.0906954	1	not significant
GPR45	-3.19339	0.03183	-3.60314	0.015898	AC negative
SLC9A9	-3.19228	0.031837	-1.93584	0.285003	not significant
ANO6	-3.19063	0.031897	-4.72052	0.002905	AC negative
SLC11A1	-3.18746	0.032081	-3.02575	0.040579	not significant
PNLIPRP1	-3.18605	0.032101	-0.217391	1	not significant
NPW	-3.18585	0.032101	-0.117202	1	not significant
SLC29A2	-3.18546	0.032101	-5.65185	0.001544	AC negative
SLC4A4	-3.18402	0.032143	-3.81982	0.011702	AC negative
HRH3	-3.18265	0.03222	-5.40944	0.001718	AC negative
ABCB4	-3.18059	0.032429	-3.0201	0.040916	not significant
SLC5A8	-3.18004	0.032471	-3.11305	0.035408	not significant
NIPAL4	-3.17963	0.032472	-4.86186	0.002589	AC negative
TCEB3	-3.17908	0.032472	0	1	not significant
IL17RE	-3.17853	0.032472	-0.131797	1	not significant
AQP6	-3.17799	0.032487	-3.77984	0.012373	AC negative
NELL2	-3.17648	0.032573	-0.217391	1	not significant
ACKR4	-3.17552	0.032622	-4.48698	0.003464	AC negative
TINAG	-3.1747	0.032681	-0.240846	1	not significant
ATP6V1D	-3.17258	0.032888	0.316872	1	not significant
SLC52A2	-3.16862	0.033164	-3.00418	0.041698	not significant
NMU	-3.16855	0.033164	-0.200198	1	not significant
CILP2	-3.16841	0.033164	-0.147477	1	not significant
ITPR2	-3.168	0.033164	-4.09785	0.006659	AC negative
VASN	-3.16725	0.033169	-1.17118	0.955982	not significant
INSL3	-3.16664	0.033169	0.830473	0.978373	not significant
WNT10A	-3.16623	0.033169	-0.0449283	1	not significant
IGFBP3	-3.16568	0.033169	-0.957306	1	not significant
LECT1	-3.16513	0.033169	0	1	not significant
KIAA0319	-3.165	0.033169	-0.323508	1	not significant
OPN4	-3.16459	0.033169	-3.14541	0.033792	not significant
MED26	-3.16433	0.033169	-0.839291	1	not significant
GREM1	-3.16433	0.033169	-0.0644071	1	not significant
APOL4	-3.16173	0.033232	-0.135809	1	not significant
CD6	-3.16142	0.033232	-0.188505	1	not significant
GPR21	-3.16023	0.033297	-6.02517	0.00121	AC negative
CNPY4	-3.1586	0.033343	-0.121432	1	not significant
KCNMA1	-3.15833	0.033343	-4.94742	0.002589	AC negative
MRGPRX2	-3.15715	0.033434	-4.11956	0.00648	AC negative
SDHA	-3.15453	0.033663	-0.381189	1	not significant
CYR61	-3.15037	0.034015	-0.0526349	1	not significant
SLC34A3	-3.15004	0.034015	-2.15788	0.192527	not significant
KCNE3	-3.14896	0.034072	-1.92804	0.288872	not significant
SERPINC1	-3.14801	0.034111	-0.0420529	1	not significant
RANGAP1	-3.1473	0.03415	0.398385	1	not significant
NFYC	-3.14679	0.03415	-0.165306	1	not significant
MIA	-3.14665	0.03415	0.335809	1	not significant
S100A13	-3.14638	0.034172	-0.086923	1	not significant
KCNQ1	-3.14584	0.034185	-3.33909	0.025531	not significant
PTGER1	-3.14462	0.034249	-4.56843	0.003165	AC negative
MFSD8	-3.14435	0.034263	-4.47502	0.003575	AC negative
C1QTNF3	-3.14408	0.034272	0.0439325	1	not significant
THPO	-3.14395	0.034272	-0.132639	1	not significant
FSTL4	-3.1434	0.034276	-0.129216	1	not significant
ABCB1	-3.14151	0.034349	-4.6967	0.003011	AC negative
PTGER3	-3.13706	0.034785	-4.92006	0.002589	AC negative
LILRA5	-3.13665	0.034797	-0.063954	1	not significant
SLC6A4	-3.13611	0.034818	-3.66071	0.014969	AC negative
FGF20	-3.13571	0.034831	-0.0556605	1	not significant
CCK	-3.13247	0.035029	1.21115	0.670007	not significant
CACNA2D1	-3.12803	0.035347	-3.4259	0.022365	not significant
ZP1	-3.1279	0.035347	0.0411018	1	not significant
NOV	-3.12763	0.035347	-0.28149	1	not significant
IL10	-3.12723	0.035347	-0.0417707	1	not significant
WFDC3	-3.12575	0.03542	-0.161535	1	not significant
OLFM1	-3.12561	0.03542	-0.723217	1	not significant
SEMA3F	-3.12508	0.03542	-0.217391	1	not significant
SLC35C1	-3.12413	0.035432	-5.25436	0.001814	AC negative
ATP6V0C	-3.12374	0.035452	0.692975	1	not significant
SCPEP1	-3.12266	0.035472	-0.709498	1	not significant
OR5I1	-3.12186	0.035509	-5.53855	0.001718	AC negative
LEAP2	-3.11984	0.035676	-0.141595	1	not significant
SLC25A33	-3.11944	0.035676	-6.50403	0.000646	AC negative
CYB5D2	-3.11891	0.035676	-0.622402	1	not significant
SFTPD	-3.11864	0.035676	-0.0821166	1	not significant
TGFB3	-3.11823	0.035676	-0.254543	1	not significant
GRP	-3.1177	0.035688	-1.13668	0.991112	not significant
SLC35A5	-3.11703	0.035699	-3.41081	0.01982	AC negative
MRGPRE	-3.1138	0.035901	-3.22209	0.030471	not significant
CNNM1	-3.11195	0.036069	-2.98708	0.042651	not significant
OTOR	-3.11168	0.036069	-0.0814612	1	not significant
OR4K2	-3.11152	0.036069	-4.4307	0.003908	AC negative
PRDX1	-3.11142	0.036069	2.72462	0.143413	not significant
KCNAB1	-3.11061	0.036069	-5.40709	0.001718	AC negative
SLC22A13	-3.11035	0.036069	-4.60508	0.003141	AC negative
COL8A2	-3.10981	0.036069	-0.47467	1	not significant
ADORA2B	-3.10981	0.036069	-5.19387	0.001814	AC negative
C1QL1	-3.10955	0.036069	-0.122969	1	not significant
OR8H1	-3.10821	0.036091	-3.02783	0.040461	not significant
NUDT4	-3.10794	0.036091	0.0786569	1	not significant
METTL1	-3.1066	0.036125	0.784548	1	not significant
SLC1A4	-3.10648	0.036125	-7.04998	0.000309	AC negative
CACNA1A	-3.10541	0.036141	-4.60532	0.003141	AC negative
SLC9A2	-3.10527	0.036141	-3.6933	0.014264	AC negative
ELOF1	-3.10488	0.036141	-2.11199	0.209952	not significant
XCL1	-3.10263	0.036245	-0.0790527	1	not significant
ATP6AP2	-3.1026	0.036245	0.361221	1	not significant
LRRC8E	-3.10235	0.036264	-3.22479	0.030471	not significant
TRIM74	-3.10168	0.029936	-0.10775	1	not significant
PGGT1B	-3.10018	0.036392	-0.217391	1	not significant
GDF9	-3.10008	0.036392	-0.0584538	1	not significant
TNPO2	-3.09732	0.03663	-4.0051	0.008118	AC negative
EGFL8	-3.09689	0.036643	0	1	not significant
SERPING1	-3.09636	0.036643	-0.0486285	1	not significant
COL27A1	-3.09543	0.036711	-0.132173	1	not significant
SLC46A1	-3.09472	0.036754	-5.67252	0.001544	AC negative
OR8B8	-3.0941	0.036758	-2.09903	0.214891	not significant
SSTR5	-3.09397	0.036758	-2.20557	0.175575	not significant
TTYH1	-3.09317	0.036763	-3.80096	0.012018	AC negative
FLVCR2	-3.09291	0.036763	-1.93129	0.287221	not significant
GPR139	-3.09145	0.036862	-3.07134	0.037965	not significant
APOC3	-3.09092	0.036873	-0.193352	1	not significant
TAP2	-3.09012	0.036875	-3.01259	0.041291	not significant
FBXW7	-3.0888	0.036958	-2.13011	0.202679	not significant
LAMC1	-3.08615	0.037193	-1.252	0.867659	not significant
S100A8	-3.08443	0.037317	-0.0412212	1	not significant
TNF	-3.0839	0.037317	-0.549351	1	not significant
SLC41A2	-3.08377	0.037317	-2.61822	0.082819	not significant
TRMT10C	-3.08347	0.037317	0.84433	0.96652	not significant
SLC35G2	-3.08338	0.037317	-2.31541	0.143143	not significant
SLC44A2	-3.08311	0.037317	-2.45274	0.111262	not significant
TFDP1	-3.08246	0.037337	-0.580623	1	not significant
ABCC10	-3.08216	0.037337	-4.54356	0.003176	AC negative
CCL18	-3.08126	0.037364	-0.0484488	1	not significant
SLC5A3	-3.081	0.037364	-3.16148	0.03314	not significant
NDUFS1	-3.07985	0.037422	0.427314	1	not significant
IL17RB	-3.07928	0.037432	-0.360543	1	not significant
TCAF1	-3.07783	0.037537	0	1	not significant
SLC17A5	-3.07768	0.037539	-5.39874	0.001718	AC negative
DKKL1	-3.07598	0.037675	-0.0628283	1	not significant
SPINK4	-3.07559	0.037701	0.104434	1	not significant
TRPV6	-3.07164	0.037941	-5.15283	0.001814	AC negative
POU2F1	-3.0689	0.038108	-0.0990924	1	not significant
SV2A	-3.06717	0.03823	-3.02048	0.040916	not significant
VWF	-3.06704	0.03823	0.0439901	1	not significant
UQCRFS1	-3.06616	0.038318	-0.217391	1	not significant
PARS2	-3.06542	0.038358	0.281274	1	not significant
USP10	-3.06271	0.038565	-1.96597	0.269553	not significant
CACNA2D4	-3.06127	0.03866	-5.4259	0.001718	AC negative
SLC27A4	-3.05969	0.038716	-5.45472	0.001718	AC negative
SAA4	-3.05891	0.038788	0.0370627	1	not significant
LAIR2	-3.05826	0.038798	-0.0917349	1	not significant
PROKR1	-3.05799	0.038798	-2.15573	0.19305	not significant
KCNQ5	-3.05773	0.038798	-1.61554	0.472348	not significant
CNNM4	-3.0558	0.038901	-4.77114	0.002609	AC negative
JAM3	-3.05564	0.038901	-0.249646	1	not significant
EDDM3B	-3.05498	0.03891	-0.04093	1	not significant
KCNA2	-3.05433	0.038965	-3.11936	0.0352	not significant
ALB	-3.05315	0.038993	0.065835	1	not significant
ORM1	-3.05289	0.038993	-0.0780172	1	not significant
SLC19A1	-3.0523	0.039029	-4.77325	0.002609	AC negative
KCNJ4	-3.0512	0.039076	-7.35584	0.000309	AC negative
SLC25A12	-3.04845	0.039327	-3.92307	0.009478	AC negative
DEFB130	-3.04783	0.03542	0	1	not significant
RPIA	-3.04663	0.039491	0.913605	0.911058	not significant
ABCB10	-3.04598	0.039491	-7.81801	0.000309	AC negative
PI16	-3.04546	0.039514	-0.440225	1	not significant
ZPBP	-3.04337	0.039709	-0.180127	1	not significant
THSD1	-3.04311	0.039721	-0.116935	1	not significant
IL22RA2	-3.04181	0.039864	-0.0625122	1	not significant
SLC35G3	-3.04064	0.03995	0	1	not significant
CSHL1	-3.03873	0.040042	-0.087183	1	not significant
SLC24A1	-3.03869	0.040042	-3.88051	0.010191	AC negative
SLC6A9	-3.03791	0.040104	-4.70569	0.002998	AC negative
GUCA2B	-3.03623	0.040195	-0.0775133	1	not significant
CXCR2	-3.03583	0.040195	-5.17355	0.001814	AC negative
OR51I1	-3.03544	0.040195	-3.35722	0.024978	not significant
COCH	-3.03428	0.040241	-0.836749	1	not significant
GHRH	-3.03285	0.040385	-0.0659967	1	not significant
SLCO3A1	-3.03246	0.040385	-3.06748	0.038137	not significant
OGN	-3.03234	0.040385	-0.0926908	1	not significant
GLS	-3.03207	0.040385	0.156823	1	not significant
OR2A14	-3.03182	0.040385	-5.2572	0.001814	AC negative
DEFB115	-3.03091	0.040468	-0.0560457	1	not significant
ADRA1D	-3.03052	0.040468	-6.08048	0.000912	AC negative
SLC5A6	-3.02949	0.040521	-3.10818	0.031278	not significant
GDNF	-3.02819	0.040596	-0.0894023	1	not significant
TNFRSF25	-3.02806	0.040596	-0.81582	1	not significant
CRLF1	-3.02573	0.040795	-0.162784	1	not significant
NMUR1	-3.02483	0.040846	-4.57595	0.003165	AC negative
HMGB2	-3.02444	0.040846	-0.116623	1	not significant
GPR161	-3.02354	0.04089	-2.61531	0.083133	not significant
EGFL7	-3.02325	0.04089	0.186799	1	not significant
PRSS35	-3.02289	0.040895	-0.48171	1	not significant
OTOGL	-3.0225	0.040895	-0.0413979	1	not significant
MFSD3	-3.02237	0.040895	-3.03596	0.04	not significant
TRPM1	-3.02173	0.040902	-5.61608	0.001544	AC negative
FBXL19	-3.02121	0.040923	-0.309919	1	not significant
OR5B2	-3.02031	0.040989	-3.05999	0.038627	not significant
CREG2	-3.01979	0.040989	-0.254691	1	not significant
OR2A12	-3.01966	0.040989	-3.27174	0.028397	not significant
OR5AN1	-3.01502	0.041321	-4.09495	0.006669	AC negative
LPAR5	-3.01296	0.041477	-5.26732	0.001814	AC negative
LHB	-3.01258	0.041477	-0.0737811	1	not significant
HCN2	-3.01155	0.041502	-3.09072	0.036644	not significant
UFL1	-3.01129	0.041502	0.0938428	1	not significant
WFDC12	-3.01078	0.041502	-0.0496303	1	not significant
SLC43A3	-3.01065	0.041502	-3.05309	0.038937	not significant
SMOC1	-3.00808	0.041651	-0.713611	1	not significant
GDF3	-3.00757	0.041657	0.0551621	1	not significant
SCN2B	-3.00693	0.041701	-2.53475	0.095745	not significant
ADM2	-3.00538	0.04182	-1.06098	1	not significant
OR5B3	-3.00449	0.041824	-4.8886	0.002589	AC negative
KCNJ8	-3.00423	0.041824	-3.26735	0.028425	not significant
TREM2	-3.00295	0.04195	0.0973391	1	not significant
ICAM4	-3.00167	0.041999	-0.194757	1	not significant
CD8B	-3.00141	0.041999	-0.0802579	1	not significant
OR1D5	-3.00064	0.042012	-3.7289	0.013418	AC negative
GPR151	-2.99974	0.0421	-4.46801	0.003606	AC negative
OR4B1	-2.99896	0.042105	-4.46614	0.003606	AC negative
PQLC2	-2.99853	0.042115	-1.05939	0.622948	not significant
COL6A2	-2.99822	0.042115	-0.282496	1	not significant
KLF16	-2.99809	0.042115	-2.33254	0.138233	not significant
SEPSECS	-2.9971	0.042172	1.37422	0.570243	not significant
MSMP	-2.99413	0.042437	-0.0768959	1	not significant
SCGN	-2.99375	0.042437	-0.0362169	1	not significant
LYPD6	-2.99311	0.04244	-0.0337221	1	not significant
ITPR3	-2.99285	0.04244	-4.60408	0.003164	AC negative
ERCC3	-2.99166	0.042512	0.0374744	1	not significant
KCNJ16	-2.98919	0.042575	-3.21007	0.030927	not significant
METAP1	-2.98919	0.042575	-0.988599	1	not significant
C1QB	-2.98919	0.042575	-0.217391	1	not significant
VWA3A	-2.98919	0.042575	-0.157566	1	not significant
GSDMD	-2.98919	0.042575	-0.109965	1	not significant
SLC25A15	-2.98809	0.042617	-3.26919	0.028401	not significant
SLC19A2	-2.98586	0.0428	-3.26938	0.028401	not significant
RHO	-2.98531	0.042842	-4.74635	0.002761	AC negative
NTSR2	-2.98456	0.042857	-3.20676	0.031145	not significant
ABCD2	-2.98443	0.042857	-5.21178	0.001814	AC negative
MAP2K3	-2.98355	0.042857	-1.56602	0.511783	not significant
FGF4	-2.98292	0.042857	-0.0521645	1	not significant
PTPN23	-2.9828	0.042857	-0.226367	1	not significant
OR10Q1	-2.98263	0.042857	-4.45589	0.003737	AC negative
SLC6A15	-2.98126	0.043001	-4.01089	0.007996	AC negative
OR6A2	-2.98009	0.04304	-3.69116	0.014264	AC negative
CRISPLD2	-2.97997	0.04304	-0.164227	1	not significant
LCN8	-2.97873	0.043069	-0.217391	1	not significant
OPTC	-2.97831	0.043069	-0.0985471	1	not significant
RSPO4	-2.97807	0.043069	-0.251115	1	not significant
SLC14A2	-2.97745	0.043096	-3.37844	0.024293	not significant
PIEZO2	-2.97572	0.043197	-5.24553	0.001814	AC negative
HTR2A	-2.9749	0.043197	-2.07746	0.223783	not significant
CACNA1H	-2.97478	0.043197	-6.25338	0.000798	AC negative
SLC6A1	-2.97237	0.04333	-5.33736	0.001775	AC negative
APOC4	-2.97228	0.04333	-0.132827	1	not significant
GPR27	-2.97049	0.043439	-2.15672	0.192848	not significant
SORL1	-2.97021	0.043439	-0.517141	1	not significant
SLC45A3	-2.96985	0.043439	-4.07	0.007015	AC negative
NDFIP1	-2.96871	0.043508	-0.679501	1	not significant
C2orf69	-2.9677	0.043578	-1.09952	1	not significant
PTN	-2.96593	0.043708	-0.101132	1	not significant
ZNF236	-2.96589	0.043708	-0.081718	1	not significant
NGF	-2.96585	0.043708	-0.0462645	1	not significant
CXCR5	-2.96541	0.043708	-3.18992	0.031991	not significant
SFTPA1	-2.96513	0.043708	-0.158666	1	not significant
DEFB116	-2.96441	0.043763	-0.148356	1	not significant
BEST2	-2.96401	0.043775	-3.67373	0.014695	AC negative
IL6R	-2.96289	0.043826	-0.160415	1	not significant
APOE	-2.96265	0.043826	0.295849	1	not significant
BPIFA2	-2.96206	0.04383	-0.112051	1	not significant
C1QTNF6	-2.96039	0.043978	-0.154765	1	not significant
SLC1A2	-2.95987	0.04399	-3.37575	0.02433	not significant
LEFTY1	-2.95873	0.044084	-0.0966766	1	not significant
SFRP5	-2.95861	0.044084	-0.712534	1	not significant
ABCG8	-2.95802	0.044124	-3.99529	0.007523	AC negative
AZGP1	-2.95739	0.044146	-0.619716	1	not significant
FXYD2	-2.95723	0.044146	-4.70333	0.002998	AC negative
NENF	-2.95632	0.044178	-0.126064	1	not significant
HTR1A	-2.95546	0.044179	-3.36323	0.024822	not significant
TRPC3	-2.95507	0.044179	-2.92147	0.047719	not significant
NPB	-2.95245	0.044376	-0.0991088	1	not significant
BRD7	-2.94993	0.044594	-0.122134	1	not significant
POSTN	-2.94943	0.044594	-0.0446105	1	not significant
TGFBR3	-2.94931	0.044594	-0.771266	1	not significant
PRG2	-2.94842	0.044626	-0.0350807	1	not significant
TIMP3	-2.94669	0.044697	-0.954912	1	not significant
PATE2	-2.94642	0.044697	-0.0624119	1	not significant
SPOCK2	-2.94439	0.04482	-0.0258846	1	not significant
EMCN	-2.94416	0.04482	-0.107388	1	not significant
GON4L	-2.94374	0.04482	-0.115658	1	not significant
REG3A	-2.9434	0.04482	-0.196543	1	not significant
TGFBI	-2.94329	0.04482	-0.0973663	1	not significant
NIPA1	-2.94165	0.044973	-3.69037	0.014264	AC negative
SLC25A1	-2.94025	0.045099	-6.302	0.000798	AC negative
APOA1	-2.94013	0.045099	-0.247115	1	not significant
ABCD4	-2.93828	0.045228	-4.51726	0.003228	AC negative
IPO4	-2.93817	0.045228	-2.58469	0.087744	not significant
CCL17	-2.93798	0.045228	-0.100464	1	not significant
COL20A1	-2.93746	0.045228	-0.40839	1	not significant
IL7R	-2.93727	0.045228	-0.188425	1	not significant
SMARCA5	-2.93667	0.04524	0.142083	1	not significant
FBLN7	-2.93614	0.04524	-0.0633053	1	not significant
KITLG	-2.93603	0.04524	-0.157472	1	not significant
AVPR1B	-2.93592	0.04524	-6.37667	0.000646	AC negative
LGI3	-2.93528	0.045302	-0.0859373	1	not significant
COL6A3	-2.93491	0.045302	-0.137392	1	not significant
OVOL1	-2.93464	0.045312	-7.06949	0.000309	AC negative
FBXO31	-2.93401	0.045339	-1.13398	0.993519	not significant
HAPLN3	-2.9339	0.045339	-0.0736215	1	not significant
SLC22A15	-2.93341	0.045384	-4.58082	0.003165	AC negative
RXFP4	-2.93178	0.04552	-1.86436	0.3197	not significant
AVPR2	-2.93004	0.045705	-4.80388	0.002589	AC negative
VIT	-2.92956	0.045728	-0.217391	1	not significant
MAPK1	-2.92893	0.045753	-0.199008	1	not significant
SLC39A1	-2.92815	0.045753	-4.88586	0.002589	AC negative
APOB	-2.92804	0.045753	-0.0391488	1	not significant
SLC37A1	-2.92793	0.045753	-5.3623	0.001718	AC negative
OR2T33	-2.92668	0.045832	-2.08238	0.221716	not significant
STX1A	-2.92482	0.045981	-0.341588	1	not significant
HTR4	-2.9238	0.046014	-4.72695	0.002872	AC negative
ZPBP2	-2.92369	0.046014	-0.0301044	1	not significant
MSLN	-2.92343	0.046014	-0.117532	1	not significant
TRPC1	-2.92318	0.046014	-4.9615	0.002589	AC negative
F3	-2.92307	0.046014	-0.123176	1	not significant
KCTD1	-2.9227	0.046016	-5.73212	0.001544	AC negative
SLC25A27	-2.92133	0.046081	-1.03071	0.783864	not significant
TRIM46	-2.92071	0.046146	-0.442144	1	not significant
GRN	-2.91797	0.046388	0.0638232	1	not significant
NXPE3	-2.91772	0.046388	-0.679501	1	not significant
SCN3B	-2.91761	0.046388	-4.83782	0.002589	AC negative
HGS	-2.91707	0.046396	-0.944736	1	not significant
SLC27A5	-2.91686	0.046396	-3.24613	0.029633	not significant
IBA57	-2.91675	0.046396	0.666694	1	not significant
C17orf67	-2.9166	0.046396	0	1	not significant
TREML4	-2.91625	0.046421	-0.0696726	1	not significant
SLC2A13	-2.91564	0.046421	-3.75758	0.012837	AC negative
GPR101	-2.9145	0.04648	-4.4464	0.003805	AC negative
ABI3BP	-2.9145	0.04648	-0.193969	1	not significant
WNT4	-2.91289	0.046567	-0.110906	1	not significant
KCNK16	-2.91279	0.046567	-3.17748	0.032478	not significant
SLC4A1	-2.91165	0.046624	-3.9677	0.008858	AC negative
ISG15	-2.91091	0.04666	-0.086022	1	not significant
SLURP1	-2.91041	0.046662	-0.0595134	1	not significant
SLC32A1	-2.91006	0.046671	-4.96233	0.002589	AC negative
CXCL17	-2.90967	0.046681	0.172056	1	not significant
MRGPRD	-2.90932	0.046681	-5.60052	0.001566	AC negative
SLC34A2	-2.90721	0.046793	-4.656	0.003054	AC negative
CD40LG	-2.90682	0.046801	-0.265392	1	not significant
BCAN	-2.90504	0.046933	-0.756392	1	not significant
PYGO2	-2.90473	0.046941	-0.104158	1	not significant
SCN10A	-2.90389	0.04696	-2.29811	0.147245	not significant
FNDC4	-2.90375	0.04696	-0.51949	1	not significant
PRSS50	-2.90351	0.04696	-0.0728864	1	not significant
BDP1	-2.90306	0.046989	-0.170388	1	not significant
DEFB103B	-2.90212	0.033169	-0.178598	1	not significant
SCNN1B	-2.90139	0.047047	-1.77619	0.365276	not significant
OR5M9	-2.90129	0.047047	-4.54909	0.003176	AC negative
PIBF1	-2.90066	0.04707	-0.225308	1	not significant
ANXA2	-2.90042	0.04707	-0.580242	1	not significant
PRSS22	-2.89994	0.047099	-0.199386	1	not significant
PF4	-2.89956	0.047101	-0.0577786	1	not significant
SLCO1B1	-2.89839	0.047258	-4.80626	0.002589	AC negative
KRTDAP	-2.89784	0.047283	-0.169732	1	not significant
NPPB	-2.89746	0.047283	-1.82936	0.33689	not significant
OR51V1	-2.89736	0.047283	-4.17858	0.005945	AC negative
SLC8B1	-2.89661	0.047358	-4.7599	0.002676	AC negative
AQP7	-2.89637	0.04736	-2.29811	0.147245	not significant
C2orf40	-2.89562	0.047422	-0.043481	1	not significant
COL1A2	-2.89514	0.04745	-0.528474	1	not significant
DAND5	-2.89452	0.047472	-0.217391	1	not significant
SLC17A9	-2.89401	0.0475	-3.02035	0.040916	not significant
OR4D9	-2.89364	0.047528	-3.31436	0.026716	not significant
OR8A1	-2.89218	0.047614	-3.09677	0.036435	not significant
RLN3	-2.89181	0.047614	-0.194085	1	not significant
PTH2	-2.89171	0.047614	-0.0437307	1	not significant
COPE	-2.89143	0.047614	0	1	not significant
UMPS	-2.8882	0.047871	0.084252	1	not significant
OLFML3	-2.88813	0.047871	-0.351972	1	not significant
RYR3	-2.888	0.047871	-5.13106	0.001814	AC negative
OR12D2	-2.88703	0.047934	-3.17849	0.032461	not significant
CCL5	-2.88679	0.047934	0.0233704	1	not significant
SPACA7	-2.88569	0.048008	-0.0451981	1	not significant
TULP1	-2.88469	0.048129	-0.032925	1	not significant
OR10Z1	-2.88372	0.048219	-2.99208	0.042467	not significant
TRPM4	-2.88346	0.048219	-3.58071	0.016699	AC negative
IGFL2	-2.88323	0.048219	-0.145585	1	not significant
OXGR1	-2.88299	0.048219	-2.62182	0.082322	not significant
EMILIN1	-2.8821	0.048286	-0.0955874	1	not significant
WNT5B	-2.8815	0.048314	-0.0602462	1	not significant
SLC39A13	-2.87897	0.04854	-4.62954	0.003054	AC negative
RSPO1	-2.87772	0.0487	-0.47898	1	not significant
SCN8A	-2.87723	0.048714	-3.91657	0.009608	AC negative
VWC2	-2.87589	0.048813	-0.994219	1	not significant
CBLN4	-2.87517	0.048822	-0.0916276	1	not significant
ABHD11	-2.87504	0.048822	0.202947	1	not significant
KCTD2	-2.87468	0.048822	-3.71113	0.013799	AC negative
SLC44A4	-2.87442	0.048822	-5.19074	0.001814	AC negative
OR4D2	-2.87432	0.048822	-3.4877	0.019723	AC negative
SIN3A	-2.87283	0.048908	-0.0557493	1	not significant
NTF3	-2.87163	0.049034	-0.0715683	1	not significant
ZFPM1	-2.87076	0.049107	-0.11631	1	not significant
KCNK5	-2.87012	0.049133	-5.3831	0.001718	AC negative
ASIC5	-2.86967	0.049135	-1.94658	0.279302	not significant
SLC34A1	-2.86957	0.049135	-4.14804	0.006217	AC negative
SLC25A32	-2.86944	0.049135	-5.75459	0.001544	AC negative
COL15A1	-2.8687	0.049135	-0.0622816	1	not significant
EFNA4	-2.86848	0.049135	0.094134	1	not significant
PGLYRP4	-2.86845	0.049135	-0.152322	1	not significant
MUC4	-2.86787	0.049227	-0.131908	1	not significant
PTGER2	-2.86531	0.049534	-5.60847	0.001544	AC negative
OR52A5	-2.8648	0.049534	-3.26297	0.028646	not significant
CRACR2B	-2.86385	0.04958	0	1	not significant
ABCD3	-2.86325	0.049593	-4.66531	0.003054	AC negative
FMOD	-2.86227	0.049684	-0.107143	1	not significant
SLC35F3	-2.86179	0.04971	-4.58424	0.003165	AC negative
CACNA1S	-2.85912	0.049958	-2.92694	0.04738	not significant
OR5K4	-2.85752	0.050153	-4.14902	0.006217	AC negative
HTR1B	-2.85692	0.050185	-2.03906	0.238332	not significant
ZNF629	-2.85328	0.050463	-0.679501	1	not significant
KCNH7	-2.85294	0.050463	-4.46684	0.003606	AC negative
BDNF	-2.85245	0.050463	-0.115295	1	not significant
ADORA2A	-2.85208	0.050463	-6.69767	0.000309	AC negative
SLC35E4	-2.85023	0.050465	-3.62606	0.015569	AC negative
SLC16A7	-2.85013	0.050465	-4.42394	0.003932	AC negative
CTHRC1	-2.85004	0.050465	-0.131185	1	not significant
CACNG1	-2.84989	0.050465	-4.56309	0.003176	AC negative
IGLL5	-2.84973	0.050465	-0.154022	1	not significant
OLFML1	-2.84967	0.050465	0.105252	1	not significant
HTR1D	-2.84924	0.05049	-3.32898	0.02607	not significant
ITM2B	-2.84906	0.05049	-0.637122	1	not significant
GPR84	-2.84881	0.050502	-1.22696	0.895232	not significant
ABCG4	-2.84857	0.050514	-3.89201	0.009994	AC negative
GPR150	-2.84676	0.050687	-3.73156	0.013405	AC negative
SLC25A24	-2.84658	0.050687	-5.36328	0.001718	AC negative
HHIP	-2.84615	0.050763	-0.105341	1	not significant
LRRC38	-2.84555	0.050788	-4.74766	0.002761	AC negative
AGER	-2.84545	0.050788	-0.188774	1	not significant
ASIP	-2.84491	0.050793	-0.0384603	1	not significant
KCNJ11	-2.84375	0.050908	-6.18302	0.000798	AC negative
PCOLCE	-2.84242	0.051023	-0.165261	1	not significant
KCNJ3	-2.84182	0.051041	-4.58546	0.003165	AC negative
TRPC6	-2.84109	0.051103	-4.8201	0.002589	AC negative
SLC23A1	-2.84094	0.051103	-4.61295	0.003072	AC negative
NPC2	-2.83989	0.051196	0.718762	1	not significant
SLC38A6	-2.83917	0.051196	-4.06155	0.007088	AC negative
SPOCK1	-2.83893	0.051196	-0.0828938	1	not significant
ASB16	-2.83809	0.051258	-0.0991742	1	not significant
GPR171	-2.83714	0.051332	-2.52542	0.097334	not significant
FAM3A	-2.83603	0.051332	-0.0904386	1	not significant
OR6C75	-2.8358	0.051332	-2.97216	0.043731	not significant
SLC27A1	-2.83473	0.051432	-4.70156	0.003003	AC negative
BPIFA3	-2.83256	0.051635	-0.0932556	1	not significant
OR6K3	-2.83088	0.051812	-3.14161	0.033879	not significant
HM13	-2.83035	0.051848	-0.63483	1	not significant
NID2	-2.82944	0.051881	-0.217391	1	not significant
AK4	-2.82918	0.051881	-0.0265489	1	not significant
UCN3	-2.82909	0.051881	-0.114599	1	not significant
CXCR4	-2.82848	0.051881	-4.63825	0.003054	AC negative
SCN4B	-2.82813	0.051881	-4.75441	0.002676	AC negative
LRRC8B	-2.82801	0.051881	-4.06124	0.007088	AC negative
NTS	-2.82751	0.051881	-0.465872	1	not significant
SCN3A	-2.82716	0.051881	-3.42291	0.022456	not significant
CNR1	-2.82705	0.051881	-5.67475	0.001544	AC negative
NEURL1	-2.82673	0.051881	0	1	not significant
UFSP1	-2.82658	0.051881	-0.603766	1	not significant
DRD2	-2.82632	0.051881	-3.70797	0.013873	AC negative
OR6P1	-2.82562	0.051941	-5.2986	0.001814	AC negative
KCNG2	-2.82524	0.051941	-4.78851	0.002609	AC negative
CRISP3	-2.82489	0.051946	0.0204016	1	not significant
METRN	-2.82382	0.052026	-0.358655	1	not significant
IGSF10	-2.82287	0.052112	-0.040453	1	not significant
SLC12A2	-2.82261	0.052123	-4.9418	0.002589	AC negative
TRIM8	-2.82177	0.05221	-1.99952	0.254247	not significant
FAM198A	-2.82131	0.052227	-0.435097	1	not significant
PAPLN	-2.82059	0.052286	-0.0263596	1	not significant
PRR27	-2.82022	0.052286	0	1	not significant
C8G	-2.81967	0.052296	-0.116753	1	not significant
SLC26A3	-2.81927	0.052296	-4.81664	0.002589	AC negative
CSH1	-2.81881	0.052296	-0.0566242	1	not significant
SLC16A10	-2.81833	0.052296	-4.08797	0.006765	AC negative
SLC26A2	-2.81807	0.052296	-3.28502	0.027994	not significant
SLC10A5	-2.81713	0.052338	-4.62408	0.003054	AC negative
GDF2	-2.81576	0.052415	-0.0406533	1	not significant
SLC7A6	-2.81545	0.052415	-4.30257	0.004871	AC negative
ADRA2B	-2.81497	0.052445	-3.7971	0.012108	AC negative
GP2	-2.81429	0.052486	-0.0415078	1	not significant
CRELD2	-2.81296	0.052618	-0.259558	1	not significant
LPAR1	-2.81223	0.052618	-0.569877	1	not significant
C9orf72	-2.81211	0.052618	-0.464453	1	not significant
OR5B12	-2.81116	0.052703	-4.76879	0.002609	AC negative
TAC3	-2.81034	0.052817	-0.0445047	1	not significant
TMC5	-2.80998	0.052817	-4.48205	0.003517	AC negative
KCNC2	-2.80774	0.053075	-3.02613	0.040579	not significant
CD14	-2.8071	0.053104	-0.0477211	1	not significant
C3AR1	-2.80629	0.053176	-2.15921	0.192142	not significant
OR4S2	-2.80521	0.053223	-5.42456	0.001718	AC negative
MIPEP	-2.80452	0.053274	-0.679501	1	not significant
TNR	-2.80308	0.053383	-0.0741879	1	not significant
GPR12	-2.80302	0.053383	-3.59888	0.016031	AC negative
CRIM1	-2.80225	0.053442	0.038005	1	not significant
SLIT1	-2.802	0.053452	-1.12653	0.999956	not significant
P2RY12	-2.80154	0.053475	-3.04146	0.039469	not significant
USP9X	-2.80011	0.053562	-1.12677	0.999956	not significant
CD5L	-2.79975	0.053562	-0.0701368	1	not significant
IPO8	-2.79868	0.053646	-4.79194	0.002609	AC negative
OR5AS1	-2.79751	0.053698	-5.15434	0.001814	AC negative
FOLR1	-2.79637	0.053698	-0.346923	1	not significant
FAM150A	-2.79621	0.053698	0	1	not significant
COL4A1	-2.79596	0.053698	-0.186026	1	not significant
SLC17A6	-2.79574	0.053698	-4.64532	0.003054	AC negative
CLCA4	-2.7955	0.053698	-5.28643	0.001814	AC negative
TXNRD1	-2.79493	0.053698	0.284816	1	not significant
ADAMTSL3	-2.7948	0.053698	1.78055	0.382299	not significant
PDE2A	-2.79431	0.053698	-0.532851	1	not significant
SLC24A5	-2.79407	0.053698	-2.741	0.065782	not significant
LY86	-2.79396	0.053698	-0.0963621	1	not significant
GPR135	-2.79393	0.053698	-2.45415	0.111087	not significant
SLC13A3	-2.79361	0.053698	-4.07378	0.006941	AC negative
FAM172A	-2.79301	0.053708	-0.278824	1	not significant
WNT3A	-2.79253	0.053717	-0.966415	1	not significant
TPCN1	-2.79185	0.053776	-4.64123	0.003054	AC negative
SLC6A2	-2.79124	0.053807	-5.56295	0.001634	AC negative
TULP3	-2.79089	0.053807	-0.115703	1	not significant
CRISP2	-2.79006	0.053862	-0.190117	1	not significant
OR8U1	-2.78971	0.053862	-4.81879	0.002589	AC negative
CRISPLD1	-2.78912	0.05389	-0.0639691	1	not significant
AVP	-2.78853	0.053918	-0.253389	1	not significant
VGF	-2.78829	0.053927	-0.328318	1	not significant
SLC26A11	-2.78805	0.053937	-3.99628	0.008285	AC negative
SLC4A3	-2.78733	0.053938	-4.51607	0.003228	AC negative
CLIC3	-2.78699	0.053938	-4.49735	0.003431	AC negative
DRAXIN	-2.78688	0.053938	-0.535227	1	not significant
NIPAL1	-2.78675	0.053938	-3.74858	0.011724	AC negative
C5AR1	-2.78558	0.054044	-3.5632	0.016927	AC negative
GTF2F2	-2.78428	0.054168	0.438326	1	not significant
IGFALS	-2.78357	0.054238	-0.854089	1	not significant
FAM24A	-2.78315	0.054247	-0.056738	1	not significant
AQP5	-2.78299	0.054262	-4.4884	0.003464	AC negative
SDC4	-2.78267	0.054278	-0.546345	1	not significant
PPP2CA	-2.78238	0.054278	-0.217391	1	not significant
SLC35E2B	-2.78228	0.054278	-4.54837	0.003176	AC negative
TAC4	-2.78157	0.054293	-0.0320591	1	not significant
CCL2	-2.78139	0.054293	-0.0710002	1	not significant
SLC4A1AP	-2.78133	0.054293	-3.2014	0.031391	not significant
BRINP2	-2.78086	0.054296	0.0969806	1	not significant
TIMP2	-2.78005	0.054335	-0.115443	1	not significant
TECTA	-2.77934	0.05441	-0.0395054	1	not significant
IGLL1	-2.77898	0.054413	-0.0738789	1	not significant
REN	-2.77851	0.054422	-0.123944	1	not significant
LAMA3	-2.77757	0.054479	-0.429072	1	not significant
CCL23	-2.77721	0.054488	-0.131426	1	not significant
MAMDC2	-2.77687	0.054521	-0.107082	1	not significant
SVOP	-2.77604	0.054596	-3.61796	0.015652	AC negative
SLC22A5	-2.77547	0.054653	-3.68048	0.014471	AC negative
KCNN3	-2.77487	0.054703	-4.65569	0.003054	AC negative
IGFBP5	-2.77464	0.054703	-0.0789277	1	not significant
SLC44A5	-2.77441	0.054703	-5.17679	0.001814	AC negative
BPIFA1	-2.77255	0.054941	-0.22892	1	not significant
BTBD18	-2.7724	0.054941	0.403942	1	not significant
TMEM25	-2.77134	0.055051	1.1606	0.707681	not significant
RREB1	-2.77098	0.055053	-0.0971598	1	not significant
PPY	-2.77029	0.055072	-1.09267	1	not significant
SLC5A2	-2.7697	0.055072	-2.03158	0.241131	not significant
RXFP2	-2.76901	0.055072	-3.24634	0.029633	not significant
MYDGF	-2.76876	0.055072	0	1	not significant
SLC25A25	-2.76873	0.055072	-4.50231	0.003414	AC negative
FSTL1	-2.7683	0.055087	-0.106028	1	not significant
SPOCK3	-2.7669	0.055193	-0.0576099	1	not significant
LUM	-2.76678	0.055193	-0.0921105	1	not significant
LGR4	-2.76619	0.055218	-3.41261	0.022964	not significant
OPRL1	-2.76584	0.055218	-4.85319	0.002589	AC negative
SLC1A6	-2.76584	0.055218	-3.30784	0.026902	not significant
PVRL4	-2.76503	0.055302	0	1	not significant
PODN	-2.7648	0.055302	-0.217391	1	not significant
PVRL1	-2.76467	0.055302	0	1	not significant
OR14J1	-2.76409	0.055375	-5.23825	0.001814	AC negative
DARS2	-2.76251	0.055506	0.203301	1	not significant
OR4A5	-2.76246	0.055506	-3.30655	0.026965	not significant
SLC35F4	-2.76223	0.055506	-4.73909	0.002765	AC negative
KCTD15	-2.75709	0.055961	-4.89381	0.002589	AC negative
EDN2	-2.75075	0.056446	-1.16003	0.967682	not significant
CCR5	-2.74744	0.056776	-3.38879	0.023828	not significant
EFTUD1	-2.74647	0.056813	0	1	not significant
PTX4	-2.74369	0.057091	-1.13851	0.989572	not significant
OXTR	-2.7353	0.057972	-5.62079	0.001544	AC negative
OR10H1	-2.72312	0.059133	-5.14252	0.001814	AC negative
SLC2A10	-2.72184	0.059239	-2.38605	0.125213	not significant
SLC17A8	-2.71406	0.059994	-4.62641	0.003054	AC negative
OR6N1	-2.71343	0.060012	-3.05699	0.038772	not significant
FFAR1	-2.70415	0.061046	-4.18553	0.005889	AC negative
NDUFS7	-2.70091	0.061419	0.165548	1	not significant
NRBP1	-2.6959	0.061962	0.936742	0.893088	not significant
SCG5	-2.69536	0.061995	-0.101363	1	not significant
DEFB124	-2.6912	0.062402	-0.172101	1	not significant
ALCAM	-2.68967	0.062493	-0.502076	1	not significant
IL23A	-2.68706	0.062847	-0.0452993	1	not significant
MZB1	-2.68445	0.063136	-0.175965	1	not significant
USP17L18	-2.68056	0.036094	0	1	not significant
ABCD1	-2.67195	0.064479	-3.15319	0.033556	not significant
CD320	-2.67028	0.064612	-6.0439	0.001114	AC negative
CACNG8	-2.66768	0.064871	-4.92314	0.002589	AC negative
AGRN	-2.66073	0.065709	-0.270244	1	not significant
CCR1	-2.66041	0.065723	-4.92369	0.002589	AC negative
IZUMO4	-2.65795	0.065953	-0.153453	1	not significant
VWA5B1	-2.6577	0.065953	-0.278222	1	not significant
SLC2A6	-2.65453	0.066373	-4.38854	0.004244	AC negative
USP1	-2.65347	0.066467	-0.613483	1	not significant
FARSB	-2.65179	0.0667	-0.363562	1	not significant
UFSP2	-2.64161	0.067928	-0.100234	1	not significant
SPCS1	-2.62982	0.069408	-1.12534	0.541112	not significant
NAA15	-2.62895	0.069454	1.761	0.392255	not significant
CCL24	-2.62891	0.069454	-0.05041	1	not significant
KCTD6	-2.62224	0.070284	-1.17685	0.952363	not significant
TRPM2	-2.62091	0.070353	-4.42426	0.003932	AC negative
GPR17	-2.62026	0.070381	-4.75572	0.002676	AC negative
CACNA1I	-2.61795	0.070657	-4.56454	0.003176	AC negative
SLC10A7	-2.60276	0.072532	-4.53756	0.003176	AC negative
LRG1	-2.60144	0.072685	-0.0545166	1	not significant
PVR	-2.59385	0.073551	-0.167421	1	not significant
CRB2	-2.58895	0.074266	-0.169347	1	not significant
FXYD1	-2.58115	0.075302	-1.63457	0.45854	not significant
OR2A42	-2.57864	0.069339	-1.58203	0.360025	not significant
GAST	-2.5739	0.07632	-1.02335	1	not significant
HPSE2	-2.5713	0.076665	-0.795554	1	not significant
SLC25A31	-2.57013	0.076753	-3.23225	0.030188	not significant
PARL	-2.56705	0.077149	-0.111455	1	not significant
FECH	-2.56639	0.077168	-0.235742	1	not significant
SAP25	-2.56395	0.077495	-0.679501	1	not significant
SLAMF1	-2.56322	0.077547	-0.0587172	1	not significant
PGLS	-2.55661	0.078548	0.270576	1	not significant
PRLHR	-2.55081	0.079314	-4.65952	0.003054	AC negative
OR7D4	-2.54957	0.079468	-5.48075	0.001718	AC negative
CDK12	-2.54786	0.079621	-0.105429	1	not significant
COL26A1	-2.54403	0.080197	-0.0720602	1	not significant
GGT1	-2.53451	0.081603	-0.149918	1	not significant
TNFSF14	-2.53211	0.082018	-0.136023	1	not significant
NOC4L	-2.53127	0.082043	1.67969	0.426148	not significant
C14orf93	-2.52011	0.083701	0.0107416	1	not significant
ASIC4	-2.51982	0.083701	-3.08974	0.036696	not significant
C1QL4	-2.51968	0.083701	-0.251533	1	not significant
LAMB3	-2.51681	0.084056	-0.0297554	1	not significant
EFEMP2	-2.51238	0.084643	-0.548091	1	not significant
TULP2	-2.51224	0.084643	-0.0364247	1	not significant
TINAGL1	-2.51111	0.084889	-0.0144029	1	not significant
SRPX2	-2.50944	0.085129	-1.17164	0.955982	not significant
PRCD	-2.5079	0.085335	-0.658111	1	not significant
INHBC	-2.50692	0.08541	0.167114	1	not significant
RGR	-2.50482	0.085723	-5.89079	0.001544	AC negative
NDUFS3	-2.50329	0.085951	0.150304	1	not significant
CCL3	-2.49841	0.086686	-0.0436875	1	not significant
C1QTNF9B	-2.49478	0.082043	0.0861226	1	not significant
RBP3	-2.49396	0.087522	-0.0819802	1	not significant
CSF1	-2.48966	0.088244	0.180259	1	not significant
OPA1	-2.48661	0.088656	0.784812	1	not significant
RPUSD4	-2.48613	0.088695	0.376968	1	not significant
TMEM38A	-2.48564	0.088724	-2.99174	0.042467	not significant
KCNB1	-2.48468	0.088825	-3.6205	0.015652	AC negative
CCNF	-2.48426	0.088848	-1.14246	0.985253	not significant
TNC	-2.48067	0.089387	0.189351	1	not significant
OR10H5	-2.48046	0.084218	0	1	not significant
C4A	-2.47999	0.089465	-0.102082	1	not significant
OR2W1	-2.47805	0.089757	-4.88669	0.002589	AC negative
FFAR3	-2.47502	0.090165	-3.02462	0.040634	not significant
OSM	-2.47407	0.090243	-1.1742	0.954242	not significant
GPR33	-2.47338	0.090264	-6.09439	0.000912	AC negative
P2RY2	-2.47311	0.090264	-2.04919	0.233525	not significant
COL18A1	-2.47255	0.090314	-0.120354	1	not significant
SLC5A7	-2.46884	0.090967	-5.05248	0.00225	AC negative
OR52L1	-2.4683	0.090977	-4.71922	0.002905	AC negative
SPACA3	-2.46433	0.091555	-0.142143	1	not significant
FREM3	-2.46419	0.091555	-0.033647	1	not significant
SCN1A	-2.46023	0.092323	-2.97695	0.043556	not significant
AP2S1	-2.45897	0.092477	2.29699	0.211429	not significant
COX10	-2.45478	0.09307	0.17309	1	not significant
C4B	-2.45469	0.09307	0	1	not significant
SLC25A2	-2.45464	0.09307	-2.4441	0.112902	not significant
LTA	-2.45451	0.09307	-0.0291048	1	not significant
CCL4L2	-2.45057	0.093615	-0.107688	1	not significant
WNT2	-2.45043	0.093615	-0.408457	1	not significant
SLC9A4	-2.45015	0.093646	-4.69086	0.003038	AC negative
FAM150B	-2.44799	0.093948	0	1	not significant
ACLY	-2.43748	0.095747	1.44899	0.531596	not significant
MBTPS2	-2.43622	0.095923	-0.756392	1	not significant
FOLR2	-2.43608	0.095923	-0.0694228	1	not significant
OR3A1	-2.43433	0.096162	-4.78112	0.002609	AC negative
RSPO3	-2.43003	0.096988	-0.165001	1	not significant
MRPL44	-2.42878	0.097144	-0.190393	1	not significant
ABCC1	-2.42855	0.097151	-2.44389	0.112902	not significant
TRPV3	-2.4268	0.097444	-1.90932	0.298553	not significant
DKK1	-2.42546	0.097638	-0.121208	1	not significant
BMP6	-2.42305	0.097998	-0.551479	1	not significant
NDUFAF7	-2.42051	0.098528	0.305167	1	not significant
SLC25A17	-2.41837	0.098952	-4.31136	0.00483	AC negative
SLC16A3	-2.41771	0.09904	-5.15951	0.001814	AC negative
BRINP3	-2.41557	0.099359	-0.0861809	1	not significant
FAM213A	-2.41423	0.099563	-0.116804	1	not significant
HBS1L	-2.41116	0.100129	-0.265392	1	not significant
DPH5	-2.40732	0.100853	-0.802637	1	not significant
AQP2	-2.40692	0.100896	-4.64422	0.003054	AC negative
FPR2	-2.40653	0.100928	-3.59938	0.016031	AC negative
OLFM3	-2.40307	0.10164	-0.174834	1	not significant
CACNA1C	-2.40201	0.101831	-4.48391	0.003476	AC negative
CNGA3	-2.40135	0.101917	-4.62135	0.003054	AC negative
PSPN	-2.39963	0.102161	-0.0534593	1	not significant
AARS2	-2.3962	0.102689	0.205742	1	not significant
SLC43A1	-2.3933	0.103266	-4.51417	0.003278	AC negative
PRSS56	-2.3929	0.103307	-0.354116	1	not significant
HERC2	-2.39144	0.103483	-0.554147	1	not significant
ODAM	-2.39119	0.103483	0.569748	1	not significant
PIP	-2.38816	0.104026	0.125953	1	not significant
KCNB2	-2.38632	0.104356	-5.22891	0.001814	AC negative
SPINK2	-2.38487	0.104603	-0.0271726	1	not significant
LGR6	-2.38422	0.104693	-1.96245	0.271401	not significant
FXYD4	-2.38277	0.104984	-4.6127	0.003073	AC negative
CHAD	-2.38186	0.105138	-0.168764	1	not significant
KCNAB3	-2.38066	0.10539	-4.91368	0.002589	AC negative
TNFSF13	-2.37845	0.105773	-0.0648708	1	not significant
IMPDH1	-2.37546	0.10633	-0.062021	1	not significant
CSN2	-2.37518	0.10633	-0.0395435	1	not significant
TMC7	-2.3744	0.106451	-4.65474	0.003054	AC negative
WNT9B	-2.37363	0.106528	-0.15819	1	not significant
HRH1	-2.37244	0.106736	-5.59671	0.001566	AC negative
PYY	-2.37215	0.106736	-0.0843891	1	not significant
COL1A1	-2.37192	0.106759	-0.8173	1	not significant
USP17L15	-2.37096	0.106885	0	1	not significant
ADORA1	-2.37036	0.106945	-3.0781	0.037497	not significant
CNTNAP3	-2.36984	0.107017	-0.473506	1	not significant
ASIC1	-2.36793	0.107258	-2.47031	0.107952	not significant
SNX25	-2.36762	0.107258	-0.234831	1	not significant
KCNJ13	-2.36749	0.107258	-4.48652	0.003464	AC negative
IL19	-2.36723	0.107258	-0.519706	1	not significant
IL11	-2.36579	0.107512	-0.194955	1	not significant
IL6ST	-2.36359	0.107922	-0.103948	1	not significant
SEMA3D	-2.3606	0.108531	-0.0800176	1	not significant
P2RY1	-2.3597	0.108698	-3.05314	0.038937	not significant
CRCP	-2.3574	0.109166	0.285469	1	not significant
SLC25A46	-2.35711	0.109182	-2.42343	0.112657	not significant
WNT1	-2.3566	0.10923	-0.187501	1	not significant
KCNG1	-2.35646	0.10923	-3.93126	0.009389	AC negative
PTGDR	-2.34924	0.110781	-5.38178	0.001718	AC negative
SLC25A29	-2.34875	0.110833	-5.29283	0.001814	AC negative
SLC6A16	-2.34859	0.110833	-6.35876	0.000646	AC negative
NDP	-2.34717	0.111078	-0.0508248	1	not significant
MC3R	-2.34242	0.112057	-1.4352	0.63953	not significant
S1PR2	-2.3419	0.112114	-3.72755	0.01344	AC negative
PAMR1	-2.33908	0.112776	0.0213174	1	not significant
PLA2G12B	-2.3387	0.1128	-0.128742	1	not significant
XCR1	-2.33652	0.113108	-4.57887	0.003165	AC negative
SLC22A7	-2.33575	0.11325	-1.91059	0.297878	not significant
UBE2S	-2.33319	0.113757	0.300509	1	not significant
SLC12A3	-2.33294	0.113757	-5.96229	0.001313	AC negative
CHGA	-2.33179	0.113968	-0.0590952	1	not significant
CCL25	-2.32928	0.114517	-0.0716195	1	not significant
ADGRG1	-2.32873	0.114575	0	1	not significant
SLC25A43	-2.32745	0.114838	-5.66549	0.001544	AC negative
GAS6	-2.32719	0.114867	-0.27758	1	not significant
FANCM	-2.32084	0.116369	0.127133	1	not significant
SLC35B4	-2.32058	0.11638	-4.53564	0.003176	AC negative
MUC17	-2.31768	0.117088	0.537932	1	not significant
MMGT1	-2.31627	0.117323	-4.79485	0.002609	AC negative
MTA2	-2.31399	0.117769	-0.0610502	1	not significant
SLC38A10	-2.31348	0.117844	-5.48041	0.001718	AC negative
ECM2	-2.3121	0.118136	-0.382685	1	not significant
KIAA1919	-2.30995	0.118619	0	1	not significant
CTDNEP1	-2.3067	0.119206	-0.16334	1	not significant
FARS2	-2.30634	0.119206	0.421361	1	not significant
KCNH3	-2.3059	0.119206	-3.57156	0.01685	AC negative
LRRC55	-2.30465	0.119449	-4.78402	0.002609	AC negative
DEFB107B	-2.3042	0.102565	-0.0991633	1	not significant
SLC23A3	-2.30327	0.119723	-3.22854	0.030316	not significant
SLC7A11	-2.30138	0.120156	-5.3076	0.001792	AC negative
SLC22A9	-2.30037	0.120345	-4.84805	0.002589	AC negative
IL15RA	-2.29987	0.120392	-0.0573769	1	not significant
PARN	-2.29937	0.120449	0.633428	1	not significant
FBN1	-2.29798	0.120685	-0.10902	1	not significant
PROS1	-2.29738	0.120784	-0.0744662	1	not significant
SLC22A4	-2.29649	0.120978	-4.55488	0.003176	AC negative
KAZALD1	-2.29535	0.121118	-0.0386454	1	not significant
COL11A1	-2.29527	0.121118	3.61642	0.056449	not significant
SPAG11A	-2.28985	0.122264	-0.0549699	1	not significant
OR1E1	-2.28959	0.122264	-3.15162	0.033662	not significant
TLK2	-2.28948	0.122264	-0.0747446	1	not significant
SCN7A	-2.28847	0.122403	-3.57057	0.016866	AC negative
C1QTNF1	-2.28411	0.123393	-0.116588	1	not significant
OOSP2	-2.27942	0.124454	0	1	not significant
HSP90AB1	-2.27888	0.124556	-0.284114	1	not significant
CDNF	-2.27777	0.124823	-0.569183	1	not significant
CACNG3	-2.27318	0.126005	-3.32679	0.026154	not significant
CST1	-2.26897	0.126886	-0.0649817	1	not significant
COL25A1	-2.26885	0.126886	-0.0670952	1	not significant
SLCO6A1	-2.26663	0.127315	-4.51013	0.003335	AC negative
FGF3	-2.26631	0.127337	-0.464149	1	not significant
PLXDC1	-2.26342	0.127948	-0.0373608	1	not significant
FGA	-2.26243	0.128136	-0.121892	1	not significant
SLC2A14	-2.26082	0.128637	-4.76932	0.002609	AC negative
ZG16	-2.25945	0.128835	-0.121754	1	not significant
SLITRK1	-2.25899	0.128903	-0.10076	1	not significant
CSH2	-2.25854	0.090165	-0.068415	1	not significant
OR10G2	-2.25432	0.130053	-4.50562	0.003372	AC negative
APOA5	-2.25262	0.130448	-0.255691	1	not significant
OR4N5	-2.25138	0.130738	-3.31828	0.026503	not significant
SLC47A1	-2.25003	0.131028	-2.40648	0.120675	not significant
SLC10A4	-2.24685	0.131728	-3.15353	0.033556	not significant
OR9K2	-2.24587	0.131893	-1.91984	0.292953	not significant
NRP1	-2.24478	0.132045	-0.217391	1	not significant
SLC35F2	-2.24466	0.132045	-4.46708	0.003606	AC negative
VWC2L	-2.24282	0.132443	-0.171147	1	not significant
APOA2	-2.24051	0.132948	-0.0773368	1	not significant
MR1	-2.23881	0.133324	-0.645584	1	not significant
SLC6A5	-2.23772	0.133555	-4.87683	0.002589	AC negative
TSEN34	-2.23601	0.133868	0.168309	1	not significant
PDGFRL	-2.23455	0.13417	-1.75439	0.377717	not significant
SLC40A1	-2.2325	0.134598	-4.17924	0.005939	AC negative
ADGRE5	-2.23233	0.134598	0	1	not significant
NUP58	-2.23002	0.135209	0	1	not significant
CCER2	-2.22838	0.135598	0	1	not significant
SPON1	-2.22801	0.135636	-0.082316	1	not significant
UCHL1	-2.22752	0.135663	-0.192519	1	not significant
STC2	-2.22717	0.135707	-3.00134	0.041948	not significant
IGFBP2	-2.22692	0.135707	-0.638669	1	not significant
OR4D10	-2.22548	0.136064	-3.20738	0.031145	not significant
GPR3	-2.2227	0.136775	-3.31284	0.026716	not significant
FIBIN	-2.2192	0.137616	-0.0256265	1	not significant
SFRP2	-2.21908	0.137616	-0.566358	1	not significant
SLC6A13	-2.21879	0.137616	-4.87439	0.002589	AC negative
PITRM1	-2.21848	0.137616	-0.187775	1	not significant
GKN2	-2.21812	0.137657	-0.645584	1	not significant
ZFP69	-2.21703	0.137873	-0.82533	1	not significant
GPR132	-2.21091	0.139662	-3.60614	0.015863	AC negative
CLU	-2.20983	0.139962	-0.126517	1	not significant
CORT	-2.2095	0.139962	0.0659007	1	not significant
SLC9A1	-2.20936	0.139962	-3.19812	0.031534	not significant
TWSG1	-2.20505	0.141065	-0.86928	1	not significant
SLC9B1	-2.20481	0.141065	-3.80897	0.01183	AC negative
SLC12A9	-2.20445	0.141079	-3.23689	0.029987	not significant
CXCL11	-2.20266	0.141496	-0.037896	1	not significant
CHRM1	-2.20218	0.141577	-3.68073	0.014471	AC negative
TNXB	-2.2001	0.142182	-0.147978	1	not significant
PDE12	-2.19563	0.143404	-0.0831988	1	not significant
RNASE10	-2.19254	0.144222	-0.104893	1	not significant
PKD2	-2.19194	0.1443	-3.27684	0.02828	not significant
PRKDC	-2.19135	0.144394	-0.179562	1	not significant
SLC12A6	-2.1904	0.144559	-2.67399	0.074397	not significant
FGF21	-2.18994	0.144617	-0.116407	1	not significant
FSTL3	-2.18898	0.144769	-0.632681	1	not significant
SLC35A1	-2.18863	0.144769	-3.00592	0.041658	not significant
THEM6	-2.18851	0.144769	-0.287864	1	not significant
PNOC	-2.18838	0.144769	-0.291282	1	not significant
GFRA4	-2.18827	0.144769	-0.101983	1	not significant
UGP2	-2.18768	0.144867	-0.55763	1	not significant
DMKN	-2.18635	0.145143	-0.60963	1	not significant
FRZB	-2.18448	0.145656	-0.0682574	1	not significant
TMPRSS6	-2.18365	0.145845	-0.481433	1	not significant
SDCBP	-2.18236	0.1461	1.73549	0.401819	not significant
PINLYP	-2.18224	0.1461	-0.0303465	1	not significant
F13B	-2.18047	0.146541	-1.12391	0.999956	not significant
COL9A1	-2.17913	0.146932	0.177309	1	not significant
NXPH4	-2.17905	0.146932	-0.295807	1	not significant
SLC16A2	-2.17646	0.147639	-2.5017	0.102119	not significant
OLFM4	-2.17581	0.147791	-0.0776275	1	not significant
C16orf89	-2.17315	0.148386	-0.111955	1	not significant
CFHR4	-2.17306	0.148386	-0.11993	1	not significant
ANGPTL2	-2.17222	0.148563	-0.0220936	1	not significant
SLC36A3	-2.1707	0.14893	-5.17661	0.001814	AC negative
P2RY13	-2.17011	0.149046	-3.98936	0.00842	AC negative
IL1RN	-2.16903	0.149287	-0.27311	1	not significant
CCR2	-2.16765	0.149668	-3.59139	0.016328	AC negative
JCHAIN	-2.16646	0.149984	0	1	not significant
TNFSF13B	-2.16192	0.151393	-0.116725	1	not significant
CCL11	-2.1618	0.151393	-0.0639993	1	not significant
HHATL	-2.16145	0.151436	-3.94481	0.009186	AC negative
IL1A	-2.16064	0.15159	-0.0289933	1	not significant
MMP23B	-2.15585	0.153067	-0.127564	1	not significant
SLC38A11	-2.1548	0.15333	-3.38698	0.023889	not significant
ADAT2	-2.15317	0.153753	0.0930619	1	not significant
ANGPTL4	-2.15259	0.153881	0.0397576	1	not significant
KCND2	-2.15004	0.154698	-5.25782	0.001814	AC negative
DDX28	-2.14934	0.15488	0.232681	1	not significant
EGFLAM	-2.14876	0.154927	-0.973344	1	not significant
LAMA5	-2.14853	0.154948	-0.0884802	1	not significant
FBXO2	-2.14656	0.155474	3.03676	0.108983	not significant
OR5M11	-2.14563	0.155685	-2.1642	0.190195	not significant
ZNF485	-2.14355	0.156235	-0.144681	1	not significant
SFN	-2.1425	0.156445	-0.201888	1	not significant
MFSD14A	-2.14043	0.157049	0	1	not significant
TFF1	-2.13997	0.157075	-0.131555	1	not significant
CST9	-2.13973	0.157075	-0.0600616	1	not significant
IHH	-2.13927	0.157205	-0.392942	1	not significant
COL5A1	-2.13847	0.157375	-1.4837	0.587941	not significant
SLC28A2	-2.13696	0.157797	-3.83965	0.011288	AC negative
PLAUR	-2.13513	0.158279	-0.156892	1	not significant
SEPHS1	-2.13264	0.158949	-0.400597	1	not significant
TMPRSS9	-2.13006	0.159639	-0.766116	1	not significant
SLC12A7	-2.12868	0.15998	-5.95857	0.001313	AC negative
SLC51B	-2.1276	0.160252	-1.7918	0.356994	not significant
OR5AK2	-2.12524	0.160915	-4.55971	0.003176	AC negative
SRGN	-2.12352	0.161403	-0.0253179	1	not significant
WNT3	-2.11793	0.163223	-0.189539	1	not significant
[truncated: 8,708 more rows]
