# Supplementary material for: Complementary CRISPR screen highlights the contrasting role of membrane-bound and soluble ICAM-1 in regulating antigen-specific tumor cell killing by cytotoxic T cells
Source: eLife. 2023 Sep 21;12:e84314. doi: 10.7554/eLife.84314 (PMC10586807; doi:10.7554/eLife.84314)
Supplement: Figure 3—source data 1. [file elife-84314-fig3-data1.xlsx]

## Sheet: Sheet 1
id	entrezgene_id	KO_score	KO_FDR	AC_score	AC_FDR	qNorm_KO_score	qNorm_AC_score	specificity
CFLAR	8837	-0.27072	3.38e-06	0.45095	2.9945e-30	-0.19359	0.738825	common
HNF1B	6928	-0.24549	7.52e-06	0.44094	3.9085e-27	-0.17759	0.69358	common
MYBL1	4603	-0.14378	0.0054119	0.4339	5.0063e-24	-0.115966	0.676985	common
MCAM	4162	0.026182	0.92616	0.37519	7.6858e-08	0.027659	0.64098	AC positive
SOCS1	8651	-0.26052	6.88e-09	0.37165	5.3035e-16	-0.187115	0.601335	common
ILKAP	80895	-0.49993	1.11e-29	0.31392	3.6233e-13	-0.33328	0.52985	common
WNT3A	89780	-0.11516	0.027518	0.30733	2.1043e-09	-0.0977545	0.488425	common
SOX9	6662	-0.14373	0.035503	0.29298	6.3736e-12	-0.115884	0.40976	common
AQP3	360	0.055845	0.69496	0.27189	3.3191e-05	0.0600845	0.38935	AC positive
OSR2	116039	0.082151	0.46368	0.26362	1.4148e-05	0.085267	0.38472	AC positive
ISL2	64843	-0.039175	0.82987	0.25067	7.397e-09	-0.0394965	0.367015	AC positive
CDK13	8621	-0.13729	0.0035845	0.25057	2.0844e-06	-0.111368	0.360365	common
RNF19B	127544	-0.11456	0.21406	0.24363	1.3073e-07	-0.097406	0.346285	AC positive
MYB	4602	0.022355	0.94869	0.23471	3.1934e-06	0.023371	0.33247	AC positive
SOCS3	9021	-0.17937	0.00088159	0.23362	2.7341e-05	-0.137999	0.320125	common
SLC25A39	51629	-0.083618	0.38054	0.23072	0.007518	-0.0766605	0.31242	AC positive
ISL1	3670	-0.057532	0.68982	0.22755	7.6061e-05	-0.056497	0.307355	AC positive
ITGB5	3693	-0.2652	1.56e-08	0.22335	8.9381e-05	-0.19037	0.305165	common
OLFM4	10562	0.0017953	0.99533	0.22137	0.00052185	0.00089765	0.30137	AC positive
PTPRJ	5795	0.020674	0.95418	0.217	0.0018961	0.021426	0.29444	AC positive
MARK3	4140	-0.10336	0.058633	0.21621	3.3191e-05	-0.089935	0.292575	AC positive
KLF5	688	-0.17915	0.00012685	0.21577	1.1233e-05	-0.137727	0.291625	common
RNFT2	84900	-0.010514	0.97946	0.21532	0.21645	-0.01049	0.28651	not significant
ZNF827	152485	-0.095717	0.22577	0.21505	1.8735e-06	-0.084866	0.285145	AC positive
FBXO11	80204	-0.53882	1.66e-35	0.21304	1.3501e-05	-0.357445	0.28377	common
PLAUR	5329	-0.037	0.89106	0.21189	3.1516e-05	-0.0376995	0.281965	AC positive
ALOX5	240	-0.0038914	0.98961	0.20796	0.0016257	-0.0032672	0.276275	AC positive
DPY19L3	147991	0.025225	0.93153	0.20442	0.063049	0.026585	0.272245	not significant
PGLYRP4	57115	0.065483	0.57414	0.20251	0.00725	0.069723	0.2708	AC positive
SFTPC	6440	0.025727	0.92984	0.20016	0.00029628	0.0270885	0.263875	AC positive
CHD6	84181	-0.056924	0.60621	0.19689	0.00070662	-0.055829	0.26055	AC positive
CHD7	55636	-0.61534	1.26e-42	0.19651	0.00028611	-0.40491	0.260285	common
GBX2	2637	-0.023215	0.93831	0.19537	0.0028239	-0.024184	0.257375	AC positive
PPHLN1	51535	-0.82643	4.34e-73	0.19452	0.0021367	-0.54871	0.254765	common
ROCK2	9475	0.06997	0.42893	0.19423	0.00010393	0.0736907	0.25171	AC positive
CBLB	868	-0.0087706	0.98401	0.19303	0.0012706	-0.0085148	0.25018	AC positive
C17orf62		0.070596	0.45794	0.19104	0.0048512	0.0742875	0.248315	AC positive
S1PR2	9294	-0.02746	0.92616	0.18902	0.0011005	-0.0286475	0.24553	AC positive
TRIM24	8805	-0.032021	0.90345	0.18386	0.000476	-0.032928	0.24222	AC positive
IL1R1	3554	0.00347	0.99184	0.18195	0.099267	0.0023959	0.240695	not significant
C17orf80	55028	-0.035503	0.88664	0.18139	0.00036107	-0.0363965	0.238655	AC positive
INSL6	11172	0.065919	0.5836	0.17752	0.1004	0.070205	0.233065	not significant
LHFPL3	375612	-0.0036286	0.98961	0.17688	0.019636	-0.0029653	0.231555	AC positive
PTPN2	5771	-1.5767	9.42e-225	0.17451	0.00097102	-1.30455	0.230255	common
MAPK1	5594	-0.67964	7.49e-48	0.17407	0.012777	-0.447925	0.228115	common
TNFAIP3	7128	-0.25586	1.02e-08	0.17377	0.00070662	-0.18401	0.22659	common
STRA6	64220	-0.0090751	0.98619	0.17219	0.018068	-0.00881185	0.225675	AC positive
DNMT3B	1789	-0.020663	0.95852	0.16988	0.00095014	-0.0215165	0.223645	AC positive
ISM2	145501	0.075738	0.45854	0.16817	0.12394	0.0792245	0.22173	not significant
NCKIPSD	51517	0.010224	0.9804	0.16796	0.060963	0.0097404	0.221375	not significant
CCND1	595	-0.34423	2.34e-12	0.16752	0.0040166	-0.238835	0.22063	common
TGFBR3	7049	-0.11905	0.020989	0.16628	0.019636	-0.100027	0.21966	common
AAK1	22848	0.030148	0.91775	0.16616	0.012761	0.0323535	0.21924	AC positive
HELZ	9931	-0.14429	0.021791	0.16545	0.0047541	-0.116335	0.218205	common
ONECUT3	390874	-0.037332	0.84428	0.16364	0.012605	-0.0380675	0.21717	AC positive
DVL1	1855	0.022607	0.94057	0.16326	0.085888	0.023754	0.216955	not significant
PCYT1A	5130	-0.56038	4.13e-09	0.16321	0.055216	-0.370205	0.216755	KO negative
DHRSX	207063	-0.15149	0.011567	0.16247	0.038506	-0.120377	0.216345	common
TBX6	6911	0.037797	0.86356	0.16177	0.014346	0.0409055	0.215675	AC positive
CIB2	10518	0.078611	0.40462	0.16084	0.0097635	0.0822245	0.214275	AC positive
SH3RF3	344558	-0.10248	0.15387	0.16022	0.0057662	-0.089342	0.212695	AC positive
SMIM4	440957	0.051445	0.73536	0.15938	0.011639	0.0555435	0.21066	AC positive
SLC33A1	9197	-0.29214	1.91e-11	0.15927	0.018824	-0.2066	0.209745	common
DBX2	440097	0.035787	0.88424	0.15789	0.0039751	0.038878	0.20796	AC positive
SDK1	221935	0.027455	0.92616	0.1576	0.012437	0.029418	0.20703	AC positive
ARL3	403	-0.088427	0.23036	0.15701	0.051012	-0.080373	0.206	not significant
SATB2	23314	-0.057359	0.71092	0.15624	0.018499	-0.056357	0.205275	AC positive
TP73	7161	-0.0024954	0.99338	0.15489	0.018068	-0.00186635	0.204045	AC positive
IGSF1	3547	0.036688	0.85311	0.15417	0.0049576	0.039778	0.20307	AC positive
PTPN1	5770	-0.32587	8.99e-13	0.15396	0.019489	-0.227205	0.201385	common
ZNF281	23528	-0.14029	0.0054954	0.15337	0.028408	-0.113669	0.198145	common
MEGF6	1953	0.070322	0.57863	0.1533	0.019907	0.074066	0.197175	AC positive
CBX4	8535	0.037791	0.84411	0.15327	0.040275	0.0408775	0.196465	AC positive
CTNNB1	1499	-0.20862	0.00053356	0.15285	0.073957	-0.15592	0.19561	KO negative
MCL1	4170	-0.063312	0.63978	0.15159	0.011639	-0.0615165	0.194675	AC positive
MCL1	574406	-0.063312	0.63978	0.15159	0.011639	-0.0615165	0.194675	AC positive
ZDHHC11	79844	-0.033855	0.86785	0.15057	0.064063	-0.034764	0.1937	not significant
ARHGEF11	9826	-0.093585	0.22577	0.15031	0.0057075	-0.083549	0.192815	AC positive
LPAR2	9170	-0.87632	1.1e-55	0.14953	0.0087918	-0.58532	0.192295	common
INHBB	3625	-0.0076112	0.98577	0.14947	0.083137	-0.0073898	0.19181	not significant
CALCOCO2	10241	-0.18566	4.37e-05	0.149	0.015803	-0.14154	0.18939	common
RIOK3	8780	-0.027832	0.92616	0.14857	0.022896	-0.029034	0.188635	AC positive
SDK2	54549	0.055108	0.69617	0.14847	0.052589	0.0592325	0.188	not significant
HAVCR2	84868	-0.0069968	0.98577	0.14804	0.011639	-0.00674095	0.186535	AC positive
BLVRB	645	0.062009	0.60472	0.14741	0.073382	0.066218	0.185865	not significant
GPR153	387509	-0.024046	0.94057	0.14738	0.038035	-0.0250395	0.18396	AC positive
RNF207	388591	-0.013385	0.97454	0.14702	0.075662	-0.0138285	0.18298	not significant
HEXDC		-0.026749	0.9383	0.14632	0.058193	-0.027993	0.181905	not significant
TMEM59L	25789	-0.036738	0.90767	0.14582	0.020087	-0.0375245	0.18145	AC positive
TAS1R3	83756	0.011493	0.97454	0.14568	0.048384	0.0110677	0.180945	AC positive
LIPT2	387787	-0.17116	0.0027305	0.14501	0.031914	-0.133158	0.180445	common
FOSL1	8061	-0.2629	1.59e-08	0.14456	0.037204	-0.188715	0.178985	common
SLC1A5	6510	-0.11367	0.056962	0.14421	0.075662	-0.0967433	0.177475	not significant
SPNS2	124976	-0.041752	0.81068	0.14389	0.019207	-0.0418215	0.177215	AC positive
SMARCA5	8467	-0.28349	1.68e-07	0.14376	0.021509	-0.20129	0.17523	common
UBE2E3	10477	-0.064717	0.62862	0.14331	0.089574	-0.0626675	0.174285	not significant
DDX59	83479	-0.18343	0.012963	0.14303	0.051734	-0.140108	0.172935	KO negative
EXOG	9941	0.0041806	0.98882	0.14275	0.17824	0.0030835	0.172125	not significant
ITGB4	3691	0.028813	0.91773	0.14243	0.11481	0.0309055	0.17116	not significant
SIX4	51804	0.081275	0.48587	0.14223	0.044961	0.0844165	0.16933	AC positive
TBX15	6913	0.026678	0.93687	0.14197	0.048466	0.028287	0.169015	AC positive
PTPN13	5783	-0.0122	0.97454	0.14105	0.037204	-0.0125765	0.168265	AC positive
HILPDA	29923	0.064461	0.60754	0.14089	0.61991	0.068456	0.1677	not significant
ULK1	8408	-0.014268	0.9722	0.14054	0.075662	-0.01479	0.167425	not significant
MAP3K3	4215	-0.12481	0.028641	0.13999	0.087559	-0.103639	0.16691	KO negative
MARK1	4139	-0.023549	0.94421	0.13964	0.068072	-0.024463	0.166085	not significant
THG1L	54974	-0.031337	0.94429	0.1394	0.025694	-0.032368	0.165535	AC positive
LCOR	84458	0.052601	0.70314	0.13908	0.033991	0.0566605	0.16535	AC positive
AP1B1	162	0.040283	0.86356	0.13886	0.097158	0.043632	0.16409	not significant
BCAM	4059	0.035519	0.88356	0.13879	0.060554	0.038611	0.163175	not significant
LPAR5	57121	-0.046732	0.84412	0.13819	0.054647	-0.0465935	0.162605	not significant
B3GNT7	93010	0.0063312	0.98619	0.13807	0.10045	0.00548165	0.16182	not significant
RTN4RL1	146760	0.013068	0.97454	0.1379	0.050325	0.012861	0.16169	not significant
ABHD12B	145447	-0.0015285	0.99533	0.13757	0.062035	-0.000846485	0.161305	not significant
WIF1	11197	0.018424	0.95418	0.13683	0.099933	0.0188585	0.16041	not significant
ACSL3	2181	-0.10187	0.15844	0.13668	0.019907	-0.088861	0.160135	AC positive
BCAR1	9564	-0.12731	0.069595	0.13647	0.050374	-0.105131	0.15984	not significant
ASB12	142689	0.020208	0.94498	0.13636	0.068246	0.0208065	0.159765	not significant
SLC9A3	6550	0.015336	0.96338	0.13606	0.12916	0.0154275	0.158185	not significant
ANKH	56172	0.019723	0.95234	0.13583	0.035894	0.020238	0.157905	AC positive
NFIA	4774	-0.0029745	0.99319	0.13582	0.055951	-0.0023195	0.15635	not significant
ACE	1636	-0.014245	0.96637	0.13556	0.064011	-0.014772	0.15606	not significant
NFKB1	4790	-0.23994	1.98e-08	0.13521	0.062602	-0.17418	0.15547	KO negative
ITGAV	3685	-0.17083	0.0004662	0.13486	0.074644	-0.132897	0.15519	KO negative
FXN	2395	0.1059	0.58481	0.13481	0.050374	0.105105	0.154415	not significant
CDNF	441549	-0.0050369	0.98644	0.13461	0.17568	-0.00453125	0.15358	not significant
SRC	6714	-0.050974	0.81962	0.13439	0.039494	-0.0504975	0.153295	AC positive
SLC13A4	26266	0.0073919	0.98619	0.13432	0.063397	0.0067121	0.15318	not significant
NR4A2	4929	0.063625	0.62862	0.13423	0.075662	0.067683	0.153095	not significant
PDIA4	9601	-0.055873	0.71927	0.1342	0.073382	-0.05497	0.15274	not significant
TARBP1	6894	-0.048242	0.81605	0.13403	0.053036	-0.047931	0.15211	not significant
PCDHGA11	56105	0.046483	0.80061	0.13389	0.21316	0.050019	0.151935	not significant
ZNF532	55205	-0.049551	0.75542	0.13349	0.075662	-0.0491375	0.150872	not significant
PIEZO1	9780	-0.036252	0.88553	0.13349	0.040253	-0.0371065	0.150872	AC positive
MYCBP2	23077	-0.10473	0.086046	0.13276	0.025694	-0.090701	0.150155	AC positive
MEIS3	56917	0.023724	0.94647	0.13253	0.050325	0.025066	0.14939	not significant
FKBP5	2289	0.011018	0.97454	0.13181	0.055951	0.01059	0.148725	not significant
KCNIP3	30818	0.0019122	0.99533	0.13152	0.075115	0.0009561	0.14857	not significant
ADIPOR1	51094	0.066316	0.58619	0.13137	0.10464	0.070585	0.14823	not significant
PFKFB2	5208	-0.041021	0.82475	0.1313	0.087346	-0.0410675	0.14809	not significant
SDF4	51150	0.010162	0.97721	0.13099	0.70117	0.0096282	0.1479	not significant
SCNM1	79005	-0.12052	0.07145	0.1307	0.097941	-0.100868	0.14768	not significant
SCNM1	100534012	-0.12052	0.07145	0.1307	0.097941	-0.100868	0.14768	not significant
FBF1	85302	0.049542	0.74169	0.13047	0.16037	0.053284	0.147365	not significant
OTP	23440	-0.018213	0.95852	0.13005	0.058193	-0.0191105	0.145925	not significant
HARS2	23438	-0.1231	0.35282	0.12984	0.25758	-0.102485	0.14564	not significant
DLX4	1748	-0.05205	0.76364	0.12972	0.067471	-0.0514955	0.145455	not significant
AK4	205	0.020149	0.9594	0.12965	0.054205	0.02074	0.144305	not significant
MED28	80306	-0.27282	3.95e-05	0.12945	0.17032	-0.19485	0.14396	KO negative
NEIL3	55247	-0.0050775	0.98644	0.12942	0.037135	-0.00457655	0.143585	AC positive
PHF23	79142	-0.17903	0.0004662	0.1294	0.059982	-0.137639	0.14325	KO negative
WWTR1	25937	-0.10952	0.052209	0.1293	0.07027	-0.093869	0.143135	not significant
ASB13	79754	0.055841	0.66794	0.12826	0.1575	0.060081	0.142475	not significant
TMEM106A	113277	-0.0291	0.91453	0.12801	0.045007	-0.0301765	0.142305	AC positive
MMP27	64066	0.024543	0.93831	0.12799	0.055951	0.0258465	0.14172	not significant
PLD5	200150	-0.021016	0.94723	0.12786	0.048466	-0.021904	0.14151	AC positive
ZBTB10	65986	-0.41931	1.41e-22	0.12785	0.10583	-0.28197	0.141055	KO negative
SLC8A1	6546	0.049279	0.73339	0.1277	0.085888	0.0529275	0.140385	not significant
SLA2	84174	0.075196	0.38165	0.12765	0.15313	0.0785895	0.139525	not significant
HES7	84667	0.0075921	0.98438	0.12752	0.10337	0.0068964	0.139175	not significant
FGF13	2258	0.054782	0.79318	0.12749	0.061691	0.058798	0.139145	not significant
GART	2618	0.061149	0.79536	0.1274	0.081268	0.06526	0.139005	not significant
MIEN1	84299	0.038376	0.89389	0.12736	0.2813	0.0415365	0.138095	not significant
DNAJC13	23317	-0.30517	7.7e-14	0.12731	0.044165	-0.21395	0.138035	common
SYBU	55638	-0.0078674	0.9837	0.1269	0.044848	-0.0076202	0.13745	AC positive
GSTM3	2947	0.016545	0.95828	0.12678	0.12311	0.016764	0.13697	not significant
ASL	435	-0.013128	0.97454	0.12676	0.059733	-0.013536	0.136555	not significant
PTCH2	8643	-0.016083	0.96338	0.12661	0.24824	-0.0167175	0.136465	not significant
RDX	5962	0.037133	0.83576	0.1266	0.098562	0.04027	0.1364	not significant
B4GALT7	11285	0.09187	0.20808	0.12632	0.10317	0.094219	0.13612	not significant
TSPAN5	10098	0.030918	0.90345	0.12627	0.10121	0.033283	0.13579	not significant
PIWIL2	55124	-0.0098774	0.98005	0.12621	0.11137	-0.00969645	0.135755	not significant
GFRA3	2676	0.069389	0.54542	0.12617	0.075115	0.0731975	0.135455	not significant
ABCE1	6059	-0.38372	0.032867	0.12608	0.086621	-0.261615	0.13512	KO negative
SPATA20	64847	0.027295	0.93188	0.12598	0.10597	0.029159	0.13464	not significant
KIAA1324L		-0.047939	0.79584	0.12578	0.25093	-0.047623	0.13418	not significant
GPLD1	2822	0.0079704	0.9837	0.12518	0.065415	0.0073358	0.13387	not significant
COL5A1	1289	-0.023172	0.94373	0.12498	0.17354	-0.024111	0.133735	not significant
ATF3	467	-0.11379	0.15844	0.12486	0.075662	-0.0969205	0.133545	not significant
STOML1	9399	0.040726	0.79818	0.12462	0.086085	0.0440795	0.133315	not significant
DPF2	5977	-0.22164	2.45e-05	0.12458	0.048176	-0.163465	0.133075	common
CLN5	1203	0.019009	0.9515	0.12452	0.097941	0.0194875	0.1325	not significant
DUSP14	11072	-0.01004	0.98401	0.12448	0.074644	-0.00989195	0.132305	not significant
RSAD1	55316	0.028567	0.94057	0.12433	0.22758	0.030535	0.131775	not significant
CDHR2	54825	-0.0033744	0.99158	0.12419	0.065729	-0.0027057	0.131655	not significant
ZNF112	7771	-0.05396	0.79572	0.12397	0.16809	-0.053092	0.131458	not significant
COL4A4	1286	0.021069	0.9436	0.12397	0.41727	0.0218735	0.131458	not significant
USP29	57663	0.0012039	0.99533	0.12392	0.085888	0.00060195	0.131055	not significant
SIRT3	23410	0.0074283	0.98577	0.12369	0.10121	0.00675345	0.130855	not significant
VPS26B	112936	-0.068681	0.58619	0.12365	0.17568	-0.0658835	0.130705	not significant
DPH7	92715	-0.14159	0.0041131	0.12328	0.24824	-0.114455	0.13044	KO negative
GK5	256356	-0.018831	0.95771	0.12317	0.17732	-0.0196765	0.130135	not significant
KRAS	3845	-0.20554	0.096636	0.12295	0.10342	-0.15399	0.12967	not significant
IQCE	23288	0.011373	0.97454	0.12287	0.08229	0.0109535	0.12951	not significant
C2CD5	9847	-0.023829	0.93831	0.12267	0.24912	-0.0247585	0.12938	not significant
IFNAR2	3455	0.048422	0.72829	0.12259	0.093773	0.0521385	0.128995	not significant
POMC	5443	0.020437	0.94853	0.12256	0.32977	0.021057	0.12895	not significant
SYT13	57586	0.040215	0.90345	0.12249	0.10045	0.043584	0.12852	not significant
WNT3	7473	0.034791	0.89123	0.12234	0.18524	0.0375925	0.128235	not significant
WNT3	101929777	0.034791	0.89123	0.12234	0.18524	0.0375925	0.128235	not significant
KCNK12	56660	0.088212	0.30467	0.12223	0.16844	0.0908375	0.128115	not significant
CRYZ	1429	0.019869	0.95155	0.12209	0.3282	0.0203985	0.12751	not significant
ITGA6	3655	0.0021086	0.99533	0.12196	0.20428	0.0010543	0.12739	not significant
RNF170	81790	0.053094	0.78853	0.12177	0.097941	0.057171	0.12728	not significant
KCTD5	54442	0.15775	0.002459	0.12166	0.12832	0.143585	0.12704	KO positive
UGT1A8	54576	-0.021425	0.94191	0.12165	0.11206	-0.022338	0.12688	not significant
DNA2	1763	0.11465	0.60531	0.12153	0.099933	0.113595	0.12678	not significant
MGRN1	23295	-0.026279	0.9372	0.12151	0.14858	-0.027384	0.126365	not significant
TRHR	7201	-0.013808	0.9711	0.12141	0.081268	-0.0143055	0.126273	not significant
SNX3	8724	-0.047457	0.76105	0.12141	0.29732	-0.0471885	0.126273	not significant
BACH2	60468	0.022413	0.94191	0.1213	0.144	0.0234525	0.12606	not significant
XBP1	7494	-0.087906	0.27904	0.12111	0.055216	-0.080005	0.1258	not significant
SLCO4A1	28231	-0.019584	0.95363	0.12106	0.41329	-0.020505	0.125575	not significant
UGT2A3	79799	0.10879	0.23108	0.12104	0.097109	0.10778	0.125515	not significant
MAPK4	5596	0.0083559	0.98619	0.12098	0.097941	0.00769095	0.125165	not significant
CTGF		-0.020737	0.94225	0.12076	0.05442	-0.0215715	0.12502	not significant
BIRC3	330	-0.044878	0.78672	0.12069	0.075662	-0.0449485	0.124935	not significant
C12orf66	144577	-0.11527	0.089605	0.12053	0.24421	-0.097812	0.12482	not significant
TSPAN32	10077	-0.010276	0.97891	0.12027	0.10317	-0.010228	0.1246	not significant
CEACAM8	1088	0.051358	0.6849	0.12015	0.11267	0.055416	0.124335	not significant
ADAM23	8745	-0.021164	0.95418	0.12001	0.1306	-0.022103	0.124215	not significant
ATL2	64225	-0.39032	6.92e-19	0.1199	0.24824	-0.265455	0.12411	KO negative
MOSPD3	64598	0.038257	0.85661	0.11987	0.14952	0.041456	0.123995	not significant
GABPA	2551	-0.046458	0.83616	0.11955	0.13071	-0.046349	0.12373	not significant
ZNF652	22834	-0.024692	0.93831	0.11942	0.16407	-0.02573	0.123585	not significant
HABP2	3026	-0.044937	0.83576	0.1193	0.082658	-0.045027	0.12351	not significant
PLCG2	5336	0.010048	0.97888	0.1192	0.18788	0.0094625	0.123365	not significant
DISP2	85455	0.024335	0.94225	0.11918	0.093773	0.025646	0.1231	not significant
WNT9A	7483	-0.022312	0.94429	0.11912	0.19815	-0.023189	0.122945	not significant
PLK4	10733	-0.024915	0.95503	0.11903	0.16866	-0.0259315	0.122695	not significant
B4GALNT1	2583	0.051929	0.75737	0.11853	0.099933	0.0560162	0.12244	not significant
EPHB4	2050	-0.033224	0.89847	0.11846	0.1845	-0.034113	0.12229	not significant
LMLN	89782	-0.0079648	0.98322	0.11842	0.26845	-0.0076967	0.122015	not significant
TTC3	7267	0.1075	0.14855	0.11841	0.25721	0.106615	0.12168	not significant
MAP3K1	4214	-0.11324	0.071565	0.1182	0.10769	-0.0963815	0.12157	not significant
SLX1B	79008	0.21054	0.0026808	0.11802	0.45611	0.177215	0.121475	KO positive
BPIFB4	149954	0.098002	0.17067	0.11791	0.083137	0.099101	0.121395	not significant
PHF3	23469	-0.22513	3.73e-07	0.11741	0.12811	-0.16574	0.12111	KO negative
CACNA2D1	781	0.046547	0.78285	0.11739	0.12811	0.050094	0.12098	not significant
MOXD1	26002	0.032869	0.90988	0.11729	0.094844	0.0355685	0.12081	not significant
PUS7L	83448	-0.096631	0.19937	0.11728	0.46259	-0.0854265	0.120765	not significant
CHAD	1101	-0.018503	0.95852	0.11703	0.12143	-0.019354	0.120525	not significant
RAPGEF6	51735	-0.08885	0.16772	0.117	0.10597	-0.0806055	0.120495	not significant
FBXO31	79791	0.019144	0.95723	0.11679	0.27602	0.019647	0.12038	not significant
VASH1	22846	0.011374	0.97765	0.11675	0.16866	0.010963	0.1202	not significant
RNF113A	7737	-0.097928	0.7033	0.11665	0.10597	-0.086296	0.120145	not significant
DIDO1	11083	-0.13318	0.017526	0.11647	0.21805	-0.108839	0.120005	KO negative
IDI1	3422	-0.12148	0.45873	0.11585	0.1614	-0.101482	0.11968	not significant
EPGN	255324	-0.057262	0.65458	0.11584	0.18524	-0.056099	0.119585	not significant
C1R	715	-0.045941	0.7754	0.11579	0.10658	-0.0459065	0.119445	not significant
DDX31	64794	-0.042732	0.83995	0.11577	0.27053	-0.0426165	0.119365	not significant
PYGO2	90780	-0.0045462	0.98985	0.11576	0.076506	-0.0039458	0.119315	not significant
WNT10B	7480	-0.022634	0.94063	0.11574	0.085204	-0.0235635	0.118505	not significant
ERCC3	2071	-0.15153	0.3135	0.11568	0.11896	-0.120429	0.11818	not significant
TGFBR2	7048	-0.11679	0.091782	0.11555	0.083694	-0.0986902	0.11801	not significant
DKKL1	27120	0.020783	0.94869	0.11553	0.10464	0.021543	0.117965	not significant
TTF2	8458	0.18557	0.23517	0.11552	0.12286	0.16182	0.117845	not significant
CROT	54677	0.026003	0.92126	0.11543	0.18233	0.0274185	0.117685	not significant
B3GNT5	84002	-0.0233	0.94057	0.11526	0.079783	-0.0242555	0.117585	not significant
ABHD11	83451	0.0073616	0.98619	0.11525	0.082658	0.00667555	0.1174	not significant
MGLL	11343	0.057504	0.63938	0.11523	0.17824	0.061789	0.11734	not significant
SPINK7	84651	-0.019971	0.95363	0.11517	0.093773	-0.0208895	0.117025	not significant
SSU72	29101	0.010278	0.98619	0.11517	0.18788	0.0098457	0.117025	not significant
RLN3	117579	-0.016399	0.95852	0.11517	0.17914	-0.0171515	0.117025	not significant
WSCD2	9671	-0.012238	0.97635	0.11476	0.16535	-0.012614	0.11657	not significant
SERPINE3	647174	-0.051811	0.71617	0.11459	0.148	-0.051212	0.116455	not significant
C3	718	-0.010481	0.9804	0.11449	0.16866	-0.010442	0.116395	not significant
HEXB	3074	-0.021884	0.94191	0.11442	0.22029	-0.022795	0.116055	not significant
ZBTB14	7541	-0.13839	0.0044851	0.11427	0.26989	-0.112357	0.115905	KO negative
LRRC38	126755	-0.020178	0.95363	0.11407	0.12669	-0.0210815	0.11576	not significant
NFASC	23114	-0.062408	0.63276	0.11393	0.18752	-0.0604595	0.115528	not significant
HENMT1	113802	-0.015974	0.96023	0.11393	0.19815	-0.016621	0.115528	not significant
RAPSN	5913	0.0033892	0.99171	0.1139	0.073382	0.00230425	0.11528	not significant
ECI1	1632	0.0087009	0.98438	0.11363	0.16893	0.00812545	0.115125	not significant
ZFYVE9	9372	-0.017042	0.95852	0.1136	0.22092	-0.01785	0.11506	not significant
SLC35F5	80255	-0.022842	0.94155	0.11343	0.17998	-0.0237438	0.114685	not significant
PTPN5	84867	0.008581	0.98269	0.11326	0.144	0.00800525	0.114545	not significant
WNT7B	7477	0.071491	0.55433	0.11288	0.18788	0.0751235	0.11424	not significant
TMC1	117531	-0.025283	0.93161	0.11287	0.13729	-0.0263885	0.114175	not significant
TGFBR1	7046	-0.077747	0.34216	0.11279	0.14942	-0.0726195	0.11413	not significant
CLEC14A	161198	0.048037	0.78303	0.11272	0.1126	0.051639	0.11401	not significant
CLCN6	1185	-0.010613	0.98051	0.11268	0.1276	-0.0106065	0.11399	not significant
ZBTB38	253461	-0.021485	0.94191	0.11264	0.1275	-0.022383	0.11388	not significant
KCNB1	3745	-0.027171	0.94191	0.11256	0.28356	-0.0284045	0.11375	not significant
DDX24	57062	0.09813	0.69613	0.11254	0.12286	0.09917	0.113595	not significant
GALNTL6	442117	0.045848	0.79318	0.11249	0.1284	0.049404	0.113465	not significant
USP7	7874	-0.48839	5.56e-10	0.1116	0.12672	-0.326705	0.112925	KO negative
ENGASE	64772	-0.041225	0.81284	0.11152	0.11267	-0.04126	0.11287	not significant
OTUD4	54726	-0.066067	0.5877	0.11132	0.10464	-0.0636665	0.11272	not significant
PGLYRP3	114771	-0.015189	0.9711	0.11097	0.085888	-0.0156595	0.11252	not significant
ZKSCAN2	342357	-0.012103	0.97454	0.11083	0.16271	-0.012472	0.11227	not significant
SARDH	1757	0.042355	0.84401	0.11075	0.10658	0.0459855	0.112225	not significant
LTN1	26046	0.005101	0.98644	0.11071	0.22458	0.0040472	0.112005	not significant
GAPDH	2597	0.018217	0.98269	0.11061	0.1287	0.0186485	0.11192	not significant
TAP2	6891	-0.15733	0.0011596	0.11059	0.148	-0.124492	0.111825	KO negative
HTR2C	3358	-0.002089	0.99533	0.1104	0.25036	-0.00145857	0.11167	not significant
CLCF1	23529	0.031151	0.89847	0.11038	0.19956	0.0336765	0.111565	not significant
ST6GAL1	6480	0.027688	0.91775	0.11015	0.148	0.029658	0.1114	not significant
CNGA3	1261	0.076875	0.45091	0.11002	0.22307	0.0805605	0.11132	not significant
VDAC3	7419	0.074164	0.43539	0.10997	0.23812	0.077612	0.111175	not significant
PKN1	5585	0.0028782	0.99338	0.10981	0.18788	0.00170561	0.11106	not significant
CXCL3	2921	0.05372	0.77025	0.10969	0.15401	0.0577725	0.110965	not significant
CDA	978	0.047119	0.7514	0.10953	0.12158	0.050684	0.110855	not significant
MAN2B1	4125	0.002905	0.99475	0.10941	0.1896	0.00172291	0.110745	not significant
NFYA	4800	0.013079	0.97995	0.10938	0.38088	0.0128735	0.110705	not significant
TMUB1	83590	-0.015506	0.96023	0.10924	0.1896	-0.0160365	0.11061	not significant
HECTD2	143279	0.035221	0.86989	0.10919	0.18649	0.038095	0.110575	not significant
SUOX	6821	-0.050774	0.7522	0.10907	0.18788	-0.050341	0.11045	not significant
TFB1M	51106	-0.079459	0.36145	0.109	0.12371	-0.074128	0.110265	not significant
PSAPL1	768239	-0.014333	0.96484	0.10898	0.14517	-0.0148395	0.110245	not significant
PRDX2	7001	0.030238	0.90503	0.10885	0.2491	0.0325125	0.11015	not significant
KDM5B	10765	0.021064	0.95306	0.10872	0.19815	0.021856	0.10995	not significant
RREB1	6239	-0.15605	0.004618	0.1087	0.15313	-0.123648	0.10992	KO negative
CABP7	164633	-0.073433	0.42173	0.10867	0.14517	-0.069554	0.109795	not significant
PHF12	57649	0.10426	0.42893	0.10839	0.1845	0.10364	0.109635	not significant
SNX16	64089	-0.071882	0.39487	0.10823	0.22757	-0.0684145	0.10954	not significant
HDAC5	10014	-0.029244	0.91775	0.10818	0.38165	-0.030388	0.10947	not significant
LAMB1	3912	0.019222	0.9508	0.10812	0.17211	0.0197095	0.109375	not significant
F3	2152	0.03633	0.89154	0.10796	0.15207	0.039433	0.109285	not significant
FAM126B	285172	-0.071641	0.49985	0.10792	0.21897	-0.068195	0.109255	not significant
PAPD4		-0.345	6.81e-16	0.10785	0.3044	-0.239765	0.109195	KO negative
MFSD6	54842	-0.05698	0.62477	0.10776	0.22757	-0.0559285	0.109145	not significant
MYRF	745	0.028866	0.93565	0.10774	0.11137	0.030957	0.109045	not significant
TADA2B	93624	-0.58411	7.87e-26	0.10771	0.11267	-0.38552	0.109025	KO negative
TMEM150A	129303	0.045366	0.79786	0.10765	0.32977	0.049019	0.10893	not significant
TOP1	7150	0.12425	0.37689	0.10755	0.18788	0.120765	0.10883	not significant
GTF3C5	9328	-0.029197	0.9436	0.10748	0.39132	-0.030289	0.10873	not significant
NKX2-1	7080	0.045908	0.78629	0.10732	0.16704	0.0494905	0.10847	not significant
FBLN2	2199	0.012599	0.97454	0.10719	0.25412	0.0123085	0.108225	not significant
HLA-B	3106	-0.013848	0.97454	0.10714	0.2189	-0.014341	0.108135	not significant
MTMR1	8776	0.04318	0.81113	0.10701	0.21645	0.0468365	0.10805	not significant
ATF6	22926	-0.035689	0.85741	0.10699	0.22307	-0.03658	0.108	not significant
CD109	135228	0.0058372	0.98619	0.10693	0.2491	0.00488885	0.10793	not significant
SOD1	6647	-0.11241	0.66021	0.10683	0.17568	-0.095873	0.107875	not significant
SLC25A51	92014	0.071016	0.40019	0.10677	0.18765	0.074673	0.10778	not significant
CLOCK	9575	-0.1942	0.0015164	0.10675	0.29732	-0.146821	0.10775	KO negative
KCNC2	3747	0.0061981	0.98619	0.10672	0.11267	0.0052843	0.107655	not significant
FERMT2	10979	-0.23947	4.48e-08	0.10668	0.32988	-0.173875	0.1076	KO negative
TMEM230	29058	-0.15507	0.019382	0.10655	0.18233	-0.122865	0.107425	KO negative
DHDDS	79947	0.038625	0.95032	0.10634	0.28356	0.0418645	0.10724	not significant
IL1RN	3557	-0.023204	0.94191	0.10632	0.21645	-0.0241655	0.10722	not significant
STMN2	11075	0.0076504	0.98577	0.1063	0.14501	0.0069599	0.107185	not significant
GPR137B	7107	-0.022411	0.94057	0.10605	0.21721	-0.0232695	0.107035	not significant
FUT4	2526	-0.022336	0.94471	0.10598	0.17824	-0.0232088	0.10692	not significant
SKP2	6502	-0.10695	0.10608	0.10578	0.50219	-0.0923135	0.10668	not significant
AMZ1	155185	0.065404	0.47378	0.10573	0.17555	0.069673	0.106615	not significant
PIRT	644139	-0.01653	0.97137	0.10568	0.148	-0.0173095	0.106585	not significant
FAHD2A	51011	-0.028347	0.91775	0.10548	0.26422	-0.029487	0.106395	not significant
MARVELD1	83742	0.1153	0.17371	0.10548	0.12811	0.114	0.106395	not significant
ARHGEF28	64283	-0.0065887	0.98619	0.10546	0.18142	-0.0062434	0.106295	not significant
DLAT	1737	-0.54036	7.5e-41	0.10539	0.35286	-0.35863	0.106	KO negative
WNT7A	7476	0.01397	0.97454	0.10533	0.15923	0.013817	0.10596	not significant
CLDN3	1365	0.026712	0.93831	0.10518	0.17306	0.028359	0.105877	not significant
PORCN	64840	-0.095193	0.13533	0.10518	0.17824	-0.0845875	0.105877	not significant
CES4A	283848	-0.017591	0.95828	0.10505	0.15718	-0.0184035	0.1057	not significant
CACNA1F	778	0.038768	0.82576	0.10501	0.14858	0.041998	0.10567	not significant
TMEFF2	23671	0.018866	0.96023	0.10498	0.18914	0.0193295	0.105645	not significant
QPRT	23475	0.044533	0.78922	0.10484	0.15049	0.0480655	0.105465	not significant
RAP1A	5906	-0.018144	0.95495	0.10459	0.26931	-0.0189665	0.105315	not significant
SGCD	6444	-0.0098034	0.98176	0.10444	0.31696	-0.0095713	0.105235	not significant
TSPAN8	7103	0.04996	0.76892	0.10432	0.23849	0.0537	0.105125	not significant
AGA	175	-0.029234	0.90767	0.10431	0.25297	-0.0303425	0.105105	not significant
ENDOG	2021	-0.051289	0.80449	0.10415	0.26831	-0.0507765	0.10487	not significant
SLC30A1	7779	0.073006	0.4148	0.10407	0.22092	0.0764875	0.10476	not significant
MICALL2	79778	0.011433	0.97454	0.10391	0.17824	0.0110075	0.10466	not significant
UBR4	23352	-0.29299	0.00039275	0.10381	0.29694	-0.20709	0.1046	KO negative
GATA1	2623	0.040498	0.84412	0.10375	0.16941	0.043802	0.10452	not significant
GLRA1	2741	0.0084728	0.98401	0.10371	0.21233	0.0078665	0.104435	not significant
GLG1	2734	-0.11367	0.034892	0.10343	0.24636	-0.0967433	0.104275	KO negative
PEX3	8504	0.11425	0.034746	0.10336	0.24421	0.112925	0.104075	KO positive
PIGG	54872	-0.055842	0.73441	0.10328	0.19219	-0.054926	0.103885	not significant
STK32A	202374	0.024405	0.9413	0.10326	0.15222	0.0257015	0.103795	not significant
XKR9	389668	-0.06441	0.51849	0.10316	0.46429	-0.062367	0.103735	not significant
RPP38	10557	-0.06298	0.87606	0.10302	0.27703	-0.061161	0.10364	not significant
BAZ2A	11176	-0.45578	1.02e-25	0.10295	0.15663	-0.30649	0.10359	KO negative
PLXNB1	5364	-0.0055438	0.98725	0.10294	0.30359	-0.0051517	0.103575	not significant
HOXB4	3214	-0.036712	0.86289	0.10293	0.27975	-0.0374975	0.103545	not significant
USP35	57558	-0.019704	0.95508	0.10286	0.51893	-0.0206295	0.103505	not significant
PLCG1	5335	0.026495	0.92984	0.10278	0.24912	0.0280245	0.10331	not significant
SESN2	83667	-0.047063	0.75542	0.10278	0.17555	-0.046865	0.10331	not significant
GBGT1	26301	0.023979	0.94191	0.10276	0.17914	0.0253382	0.103295	not significant
CPLX3	594855	-0.020379	0.94898	0.10272	0.22092	-0.021242	0.103005	not significant
SMURF1	57154	0.0090377	0.98269	0.10253	0.30291	0.00841665	0.10291	not significant
SLC25A25	114789	0.11151	0.076493	0.10251	0.19541	0.110245	0.102835	not significant
NUDT4	11163	0.0070387	0.98619	0.10249	0.18788	0.00631395	0.10274	not significant
PPM1G	5496	0.26194	1.46e-07	0.10244	0.23603	0.21066	0.102655	KO positive
PAQR5	54852	0.072573	0.43915	0.10243	0.15401	0.0759935	0.10262	not significant
SACM1L	22908	-0.1489	0.23394	0.1024	0.18788	-0.118977	0.10255	not significant
UCHL5	51377	-0.096189	0.25623	0.1022	0.14581	-0.0851995	0.10234	not significant
BRI3	25798	0.010153	0.98051	0.10219	0.2189	0.0096111	0.10232	not significant
LYPD3	27076	-0.018154	0.95852	0.10189	0.26119	-0.0189905	0.10216	not significant
SYNE1	23345	0.034303	0.8788	0.10185	0.19815	0.0370925	0.102115	not significant
TNKS2	80351	0.030133	0.90345	0.10172	0.16271	0.0323075	0.10196	not significant
CDK3	1018	0.082797	0.33074	0.10164	0.22092	0.0858305	0.10186	not significant
TRIM40	135644	0.022546	0.94155	0.10152	0.28519	0.023628	0.101785	not significant
LAPTM4B	55353	-0.0065256	0.98619	0.1015	0.34753	-0.0061779	0.101645	not significant
RAB27A	5873	-0.009105	0.98269	0.10146	0.27053	-0.0088478	0.10157	not significant
GJD2	57369	0.0066121	0.98619	0.10123	0.18609	0.0057653	0.10126	not significant
JUN	3725	-0.064357	0.63853	0.10121	0.21498	-0.0623405	0.10112	not significant
GPR27	2850	0.025679	0.94191	0.10113	0.1845	0.0270525	0.10108	not significant
CKM	1158	0.010073	0.98002	0.10112	0.25721	0.009514	0.100995	not significant
TECTA	7007	-0.0071257	0.98577	0.10109	0.1614	-0.0069067	0.10092	not significant
TECTA	116804918	-0.0071257	0.98577	0.10109	0.1614	-0.0069067	0.10092	not significant
TLK2	11011	0.016738	0.96775	0.10107	0.27602	0.016958	0.100885	not significant
PALM2		0.072222	0.43391	0.10105	0.42909	0.0756025	0.10077	not significant
DHRS1	115817	0.05711	0.64529	0.10102	0.27703	0.061412	0.10071	not significant
TNFSF12	8742	-0.029696	0.90345	0.10072	0.26845	-0.0308365	0.100505	not significant
RUVBL2	10856	-0.17274	0.53338	0.10066	0.54231	-0.134084	0.100465	not significant
C1orf159	54991	0.027564	0.92104	0.10065	0.27703	0.029564	0.100309	not significant
KLHL24	54800	-0.0058002	0.98619	0.10061	0.15049	-0.0054299	0.100106	not significant
RNASEH2A	10535	-0.034727	0.90895	0.10056	0.21316	-0.035651	0.0998535	not significant
TLCD2	727910	0.011293	0.97995	0.10056	0.2491	0.0108477	0.0998535	not significant
TGIF2	60436	-0.1308	0.039888	0.10056	0.24277	-0.107233	0.0998535	KO negative
BPIFC	254240	0.070648	0.55563	0.10052	0.1845	0.074353	0.099557	not significant
EMC10	284361	-0.08143	0.44698	0.10035	0.29732	-0.0753245	0.0994	not significant
CACNA1D	776	-0.0016788	0.99533	0.10033	0.25297	-0.00106276	0.0993835	not significant
NAGLU	4669	-0.018667	0.95306	0.10031	0.4583	-0.019526	0.09927	not significant
TMEM42	131616	-0.032155	0.91775	0.10021	0.18788	-0.0330365	0.0991795	not significant
ELOF1	84337	0.30733	5.84e-12	0.10021	0.26119	0.25018	0.0991795	KO positive
LIN7C	55327	-0.027323	0.91857	0.1002	0.26989	-0.028524	0.099101	not significant
PYGM	5837	0.023254	0.9436	0.10017	0.1741	0.024529	0.098928	not significant
RAB18	22931	-0.10396	0.08009	0.10011	0.29732	-0.0902615	0.0987725	not significant
FAM169A	26049	0.080004	0.39616	0.099899	0.32501	0.083657	0.098622	not significant
EEF2	1938	-0.0026289	0.99533	0.099886	0.21645	-0.00199665	0.0983815	not significant
EPHA1	2041	-0.053831	0.68904	0.099797	0.24113	-0.0530085	0.098337	not significant
BCAT2	587	0.10603	0.13915	0.099697	0.49609	0.105235	0.0982805	not significant
TRMT5	57570	-0.26818	8.82e-05	0.09961	0.24492	-0.19206	0.0981485	KO negative
NOBOX	135935	0.029806	0.91459	0.099604	0.3303	0.031985	0.098063	not significant
ELOVL4	6785	0.0045903	0.98907	0.099576	0.26931	0.00350045	0.098047	not significant
HPRT1	3251	0.033424	0.87337	0.099567	0.22458	0.0362935	0.0979705	not significant
S1PR4	8698	-0.048195	0.80716	0.099506	0.30653	-0.047873	0.0979155	not significant
LTA4H	4048	-0.056835	0.66067	0.099503	0.15313	-0.055755	0.097849	not significant
GNPDA1	10007	0.0038851	0.98921	0.099411	0.22092	0.0028194	0.097679	not significant
TNFRSF11A	8792	0.0024509	0.99495	0.099377	0.22757	0.00134198	0.097629	not significant
CBLC	23624	0.0033388	0.99139	0.099346	0.26119	0.00224245	0.0976005	not significant
SIRT4	23409	0.024879	0.94191	0.099313	0.52427	0.0261995	0.0975735	not significant
KCTD11	147040	0.0010983	0.99533	0.099281	0.27703	0.00054915	0.097468	not significant
PAFAH1B3	5050	0.054968	0.80195	0.09917	0.30384	0.059087	0.0973505	not significant
TTLL1	25809	0.012448	0.97396	0.099105	0.17658	0.012127	0.097302	not significant
DLX3	1747	-0.0084952	0.98375	0.099011	0.2838	-0.00818125	0.0972215	not significant
MCCC1	56922	0.008578	0.98401	0.098916	0.26845	0.0079954	0.0971735	not significant
ADARB1	104	0.0085693	0.98269	0.098858	0.21195	0.00798295	0.0969685	not significant
RPS6KA5	9252	-0.046488	0.78303	0.098791	0.29732	-0.046368	0.096824	not significant
PCGF1	84759	-0.010337	0.98051	0.09874	0.29732	-0.010296	0.0967548	not significant
MAN1C1	57134	0.014633	0.96968	0.09874	0.35958	0.014629	0.0967548	not significant
IPO5	3843	-0.13388	0.02588	0.098617	0.30656	-0.109233	0.0966145	KO negative
GUCA2A	2980	0.066734	0.62146	0.098614	0.16866	0.071107	0.0964545	not significant
ACSL6	23305	-0.00042626	0.99702	0.098453	0.45389	-0.00021313	0.09633	not significant
ZDHHC4	55146	0.034773	0.87	0.098203	0.31248	0.0375385	0.09618	not significant
CTSC	1075	-0.016474	0.96017	0.098031	0.34946	-0.017209	0.096054	not significant
STAT1	6772	1.0267	4.97e-132	0.098011	0.19815	0.738825	0.096002	KO positive
ARIH2	10425	0.0448	0.75542	0.097974	0.2189	0.0484375	0.0959505	not significant
HOXA6	3203	0.023167	0.94191	0.097887	0.20284	0.024384	0.095893	not significant
CHRNA7	1139	0.020818	0.95418	0.097841	0.39174	0.0215793	0.095865	not significant
FAXC	84553	0.0058211	0.98619	0.097782	0.27053	0.00487125	0.0957215	not significant
LHX2	9355	0.051399	0.81423	0.097758	0.42026	0.0554825	0.0957005	not significant
UAP1L1	91373	-0.049535	0.77818	0.097721	0.17032	-0.0491275	0.0956745	not significant
AGL	178	0.049007	0.75609	0.097655	0.3125	0.052698	0.095639	not significant
KIAA0319	9856	-0.044416	0.76892	0.09762	0.38814	-0.0444275	0.0956105	not significant
STC2	8614	0.025191	0.93188	0.097563	0.66593	0.0265015	0.095567	not significant
PRKX	5613	0.047011	0.75232	0.097512	0.41955	0.0505365	0.0954855	not significant
SLITRK3	22865	0.00015776	0.99928	0.097486	0.37754	7.888e-05	0.095373	not significant
ASTN2	23245	-0.0099829	0.98269	0.097443	0.19009	-0.00979875	0.0953395	not significant
DPH5	51611	-0.41998	1.44e-17	0.097437	0.2491	-0.28271	0.0952605	KO negative
TMEM86A	144110	0.012347	0.97454	0.097323	0.22092	0.011945	0.0950595	not significant
PEX10	5192	0.024668	0.93687	0.097138	0.22887	0.025998	0.0949215	not significant
LPCAT3	10162	-0.030965	0.90414	0.097107	0.23014	-0.032033	0.0948745	not significant
P2RX2	22953	0.005612	0.98619	0.097037	0.18788	0.0046019	0.094815	not significant
HRASLS5		-0.023019	0.94869	0.096956	0.19	-0.0239585	0.0947305	not significant
FNDC4	64838	0.051362	0.75854	0.096903	0.28356	0.0554265	0.094661	not significant
MOGS	7841	-0.26031	2.98e-07	0.096647	0.20527	-0.186915	0.0945175	KO negative
STUB1	10273	-0.286	1.74e-11	0.096645	0.25297	-0.202765	0.094264	KO negative
TFCP2L1	29842	-0.018685	0.9515	0.096568	0.24421	-0.0195455	0.094219	not significant
CDC25A	993	-0.19994	0.00012234	0.096433	0.16407	-0.15045	0.0941505	KO negative
CLPSL2	389383	0.01055	0.98401	0.096215	0.32292	0.0101228	0.0940375	not significant
OXCT2	64064	0.055149	0.77159	0.096007	0.29999	0.059291	0.093883	not significant
ZNF583	147949	0.026839	0.94057	0.095976	0.27245	0.0286375	0.0938275	not significant
ELOVL1	64834	0.0084302	0.986	0.095962	0.38101	0.007798	0.093809	not significant
PTGES3	10728	-0.15411	0.0016147	0.095949	0.22757	-0.122304	0.0937845	KO negative
SLAMF6	114836	0.005712	0.98619	0.095922	0.16866	0.00473315	0.093707	not significant
CDC25B	994	-0.018372	0.95418	0.095864	0.27297	-0.019251	0.093559	not significant
GFRA4	64096	-0.066511	0.63853	0.095752	0.31389	-0.0639765	0.0935	not significant
ELOVL7	79993	-0.0051406	0.98619	0.095746	0.52427	-0.0047502	0.0934845	not significant
NAA40	79829	-0.096653	0.27632	0.095635	0.33217	-0.0854665	0.0933865	not significant
NRN1L	123904	-0.031035	0.91857	0.09562	0.41955	-0.0320835	0.093359	not significant
KCTD3	51133	-0.053102	0.72247	0.09551	0.17824	-0.0524635	0.093265	not significant
SCN11A	11280	0.019514	0.95828	0.095463	0.26422	0.0200195	0.093239	not significant
GFPT1	2673	-0.89767	6.87e-62	0.095285	0.22277	-0.613145	0.093077	KO negative
NUDT15	55270	0.042005	0.85456	0.095261	0.31348	0.045655	0.0930545	not significant
SLC6A4	6532	-0.017895	0.96023	0.09518	0.38088	-0.018757	0.0929995	not significant
RNF112	7732	-0.017325	0.96655	0.095085	0.26931	-0.018189	0.0929025	not significant
CHIC2	26511	-0.16842	0.0020383	0.095068	0.22757	-0.131382	0.0928685	KO negative
AMIGO1	57463	-0.038387	0.84484	0.095037	0.38344	-0.0389695	0.092785	not significant
PAX4	5078	0.082248	0.37886	0.094959	0.21233	0.08539	0.0926795	not significant
IFNE	338376	0.055244	0.66554	0.094864	0.26989	0.0594305	0.092607	not significant
RASGRP2	10235	-0.0096852	0.98269	0.09469	0.24912	-0.00945025	0.092382	not significant
PMVK	10654	-0.13678	0.069595	0.094603	0.25412	-0.110912	0.0923075	not significant
FJX1	24147	-0.08933	0.37652	0.094524	0.39418	-0.0809065	0.0922125	not significant
CYP46A1	10858	0.084472	0.24766	0.09449	0.2491	0.087422	0.092162	not significant
HLA-C	3107	-0.026018	0.9372	0.094421	0.33406	-0.027147	0.0921005	not significant
STX11	8676	-0.01945	0.96023	0.094417	0.35992	-0.0203505	0.0920845	not significant
GSR	2936	0.12354	0.066417	0.094352	0.29732	0.120005	0.0920465	not significant
GAK	2580	-0.0043618	0.98961	0.09434	0.27703	-0.00379058	0.0919105	not significant
UPF1	5976	-0.01552	0.98619	0.094283	0.22092	-0.0160465	0.0918675	not significant
ZFYVE16	9765	0.0068913	0.98619	0.094273	0.37892	0.00607545	0.091862	not significant
FFAR1	2864	0.045801	0.82987	0.09417	0.22946	0.049369	0.09173	not significant
CHRNA4	1137	-0.0019388	0.99533	0.094084	0.35711	-0.00133195	0.091661	not significant
PLCH2	9651	0.017724	0.95645	0.094037	0.24607	0.0180455	0.0916335	not significant
TNFRSF10B	8795	0.056207	0.73105	0.094035	0.38088	0.0605705	0.091619	not significant
D2HGDH	728294	-0.00097644	0.99533	0.094027	0.23045	-0.00048822	0.091554	not significant
CUL9	23113	0.0076468	0.98619	0.094012	0.38169	0.0069483	0.0915055	not significant
SLC45A4	57210	-0.018449	0.95828	0.09393	0.20029	-0.01931	0.0914485	not significant
NR2C1	7181	0.026698	0.9372	0.093863	0.27053	0.0283238	0.091412	not significant
LUZP2	338645	0.014528	0.96484	0.093629	0.40226	0.0145215	0.091264	not significant
NEDD4	4734	0.0044996	0.98779	0.093588	0.2491	0.0034086	0.0911295	not significant
SPINK4	27290	0.084404	0.29348	0.093583	0.25128	0.0873565	0.0910135	not significant
LAMA5	3911	0.015755	0.96923	0.093575	0.27346	0.015897	0.0909575	not significant
RNF11	26994	0.084211	0.32179	0.093491	0.33227	0.087027	0.0909055	not significant
HOXC11	3227	0.022139	0.94337	0.093463	0.24113	0.0230955	0.0908375	not significant
ADAP2	55803	-0.0011162	0.99533	0.093429	0.21645	-0.0005581	0.0907765	not significant
NXPE3	91775	0.018726	0.95418	0.093415	0.41497	0.019169	0.090717	not significant
FZD8	8325	0.0039134	0.98921	0.093397	0.33617	0.0028554	0.0907035	not significant
NPC1	4864	0.064004	0.54544	0.093346	0.36347	0.0680115	0.0906635	not significant
GTF2A1	2957	-0.080281	0.551	0.0933	0.24607	-0.074627	0.0905615	not significant
ZBTB39	9880	0.033054	0.89429	0.093299	0.24389	0.035881	0.090544	not significant
ERI1	90459	-0.022265	0.9515	0.093257	0.25093	-0.023163	0.0905115	not significant
DAPK2	23604	0.044607	0.81068	0.093211	0.29208	0.048221	0.0904675	not significant
LPAR3	23566	-0.06879	0.52756	0.093205	0.26193	-0.0659575	0.090434	not significant
PDCD6IP	10015	-0.098792	0.37689	0.09309	0.43491	-0.08691	0.0903715	not significant
BHMT2	23743	0.014053	0.97071	0.092989	0.28246	0.013944	0.090282	not significant
PELI2	57161	0.079306	0.73326	0.092982	0.26845	0.082976	0.090265	not significant
MSL2	55167	-0.2649	4.34e-09	0.092923	0.2901	-0.190085	0.090221	KO negative
KIF15	56992	0.0062899	0.98619	0.092872	0.24702	0.00539315	0.0901865	not significant
IGDCC3	9543	0.05614	0.78303	0.092817	0.38814	0.0604735	0.090138	not significant
YY2	404281	0.022005	0.94225	0.092814	0.26193	0.022983	0.0900275	not significant
CXXC1	30827	-0.3765	0.00011996	0.092788	0.28412	-0.25725	0.090003	KO negative
OR6S1	341799	-0.0098603	0.98577	0.09269	0.26989	-0.0096585	0.089848	not significant
BTBD17	388419	0.041134	0.81056	0.092562	0.37113	0.0444935	0.089749	not significant
SMG6	23293	-0.25449	0.20793	0.092556	0.25297	-0.183285	0.089732	not significant
PRDX3	10935	0.0044698	0.98921	0.092517	0.36539	0.0033743	0.08967	not significant
RNF149	284996	0.0032792	0.99171	0.092511	0.36363	0.00209647	0.0896475	not significant
MKNK1	8569	0.02622	0.92616	0.092495	0.24607	0.027691	0.08962	not significant
MKX	283078	0.039082	0.84428	0.092456	0.29732	0.0423545	0.089599	not significant
GLDC	2731	0.010266	0.98269	0.092427	0.23849	0.00982855	0.089524	not significant
IL1B	3553	0.045653	0.80716	0.092356	0.24912	0.0492185	0.0894555	not significant
POU5F1B	5462	-0.02238	0.94869	0.092334	0.24454	-0.023251	0.089396	not significant
NR4A3	8013	-0.0015335	0.99533	0.09212	0.30384	-0.00084995	0.0891705	not significant
LTC4S	4056	0.072227	0.70291	0.09208	0.25093	0.07561	0.089089	not significant
CMTM8	152189	-0.015255	0.97003	0.092004	0.3292	-0.015759	0.0890495	not significant
ADAM10	102	-0.0296	0.91724	0.091834	0.32583	-0.030683	0.0889485	not significant
TPST1	8460	-0.037065	0.85428	0.091806	0.4049	-0.037798	0.0888835	not significant
AMH	268	-0.029913	0.91395	0.091742	0.26739	-0.0311045	0.0887565	not significant
FBXO34	55030	0.027281	0.92616	0.091531	0.27053	0.0291355	0.088646	not significant
CD276	80381	0.02049	0.94869	0.091501	0.2246	0.021124	0.088541	not significant
GLUL	2752	-0.10942	0.12301	0.091406	0.30312	-0.093743	0.0884555	not significant
GLS	2744	0.05019	0.80669	0.091323	0.26147	0.054022	0.088346	not significant
QARS		-0.32747	0.0078111	0.091035	0.27053	-0.228115	0.088129	KO negative
SLC25A43	203427	-0.018617	0.95828	0.090945	0.24912	-0.019478	0.088034	not significant
SULF2	55959	-0.0055645	0.98619	0.090869	0.44995	-0.00518535	0.087996	not significant
HOXC4	3221	-0.019931	0.9515	0.090829	0.29694	-0.020859	0.0879615	not significant
RRM1	6240	-0.26774	0.087144	0.090759	0.31987	-0.19174	0.087824	not significant
TEX28	1527	0.035417	0.85016	0.090554	0.32057	0.038481	0.0877145	not significant
ST8SIA2	8128	-0.023915	0.9383	0.090522	0.33924	-0.0248578	0.0876665	not significant
MVD	4597	-0.17803	0.010108	0.090488	0.343	-0.137054	0.087617	KO negative
ATP8B2	57198	-0.024107	0.94155	0.090486	0.37605	-0.0251315	0.08755	not significant
RFNG	5986	0.059526	0.65688	0.090445	0.38814	0.063667	0.0874975	not significant
OTUD6B	51633	0.19451	1.18e-05	0.090394	0.31974	0.1677	0.0874565	KO positive
SRPK2	6733	-0.014449	0.97064	0.090372	0.3699	-0.014962	0.087422	not significant
TATDN3	128387	-0.024924	0.9383	0.090359	0.25165	-0.0259475	0.0874115	not significant
SCAMP1	9522	0.049539	0.73536	0.090309	0.37949	0.053267	0.0873565	not significant
TTLL6	284076	-0.050271	0.79536	0.090304	0.4646	-0.049758	0.0873475	not significant
KCNC4	3749	0.00037341	0.99741	0.090122	0.47737	0.000186705	0.087199	not significant
CRAT	1384	-0.036225	0.85809	0.089968	0.25476	-0.0370845	0.087115	not significant
RYR3	6263	0.015874	0.96023	0.089843	0.3165	0.016015	0.087027	not significant
SPA17	53340	-0.015863	0.96074	0.089828	0.31919	-0.0165	0.0870025	not significant
UNCX	340260	0.024825	0.94421	0.089779	0.25093	0.0261585	0.0869537	not significant
PKM	5315	-0.047922	0.89565	0.089779	0.4088	-0.0475855	0.0869537	not significant
SLC12A4	6560	0.055993	0.69647	0.089749	0.26119	0.0602925	0.0869045	not significant
TVP23B	51030	-0.071738	0.53241	0.089692	0.27053	-0.0683175	0.086874	not significant
CCNY	219771	-0.012384	0.97454	0.089648	0.41955	-0.0127482	0.0867895	not significant
CNTNAP1	8506	0.002253	0.99533	0.089609	0.47737	0.0011265	0.086761	not significant
MAST1	22983	0.01623	0.963	0.089576	0.40899	0.0164145	0.0866865	not significant
CDH11	1009	0.01562	0.96023	0.089569	0.27822	0.015743	0.086591	not significant
GMPR2	51292	0.052538	0.73256	0.08947	0.36926	0.0566155	0.0865225	not significant
NME3	4832	0.052982	0.73078	0.089458	0.24912	0.057073	0.086465	not significant
KXD1	79036	0.032262	0.90706	0.089406	0.29732	0.0347595	0.0863855	not significant
EVA1B	55194	-0.0090217	0.98269	0.089406	0.34719	-0.0087465	0.0863855	not significant
AURKA	6790	0.0058513	0.99533	0.089289	0.32057	0.0049005	0.086289	not significant
MFAP3L	9848	-0.015066	0.96023	0.089286	0.35079	-0.015528	0.086287	not significant
RRP8	23378	0.016359	0.97071	0.089168	0.57993	0.0165675	0.0862215	not significant
VPS52	6293	-0.28477	9.55e-09	0.089086	0.25336	-0.201995	0.086178	KO negative
TMEM50B	757	-0.019315	0.9527	0.089042	0.26147	-0.0201865	0.086103	not significant
TMTC2	160335	0.042657	0.84182	0.089026	0.27053	0.0463265	0.086039	not significant
USP48	84196	0.054873	0.70291	0.088978	0.30384	0.058946	0.085969	not significant
PPIB	5479	0.026572	0.92985	0.08896	0.27013	0.028104	0.0859465	not significant
ATF7IP2	80063	0.010814	0.97516	0.088936	0.29732	0.0103602	0.0858835	not significant
C16orf91	283951	0.044822	0.76154	0.088871	0.29445	0.0484537	0.0858475	not significant
HIVEP2	3097	0.090533	0.25379	0.088864	0.26119	0.092785	0.0858305	not significant
NUS1	116150	-0.033648	0.95418	0.08885	0.43355	-0.034545	0.085742	not significant
NTNG2	84628	0.0084365	0.98269	0.088845	0.34788	0.00780525	0.085716	not significant
PAPD7		-0.11965	0.022759	0.088821	0.42051	-0.100339	0.085703	KO negative
TGFBI	7045	0.030224	0.91857	0.088782	0.28838	0.0324945	0.085677	not significant
CYP2A6	1548	0.026044	0.93547	0.08874	0.27602	0.0274555	0.085646	not significant
ATF7IP	55729	-0.25967	8.35e-09	0.088716	0.29709	-0.18633	0.0856295	KO negative
DCST1	149095	0.031916	0.88738	0.0887	0.22757	0.034433	0.0855845	not significant
LATS1	9113	0.089081	0.21696	0.088684	0.39415	0.091554	0.085571	not significant
KCTD2	23510	0.089901	0.19424	0.088611	0.30304	0.0922125	0.0855315	not significant
SPAG11B	10407	-0.0060765	0.98619	0.088573	0.29456	-0.0056955	0.085417	not significant
ACSBG2	81616	0.02714	0.91775	0.088532	0.24589	0.02895	0.08539	not significant
HHAT	55733	-0.010415	0.9802	0.088522	0.26337	-0.0103975	0.0853435	not significant
MAPK12	6300	0.0036936	0.99171	0.088383	0.38088	0.0026403	0.085267	not significant
PAK3	5063	0.043934	0.80442	0.088306	0.2891	0.0475035	0.0851955	not significant
GSTA2	2939	0.082824	0.26935	0.088254	0.35408	0.0858475	0.085155	not significant
SUSD5	26032	0.011528	0.98005	0.088236	0.29732	0.011104	0.085145	not significant
TAB2	23118	-0.45236	4.63e-28	0.088235	0.37848	-0.3037	0.085136	KO negative
DMPK	1760	0.014876	0.97219	0.088234	0.2491	0.014981	0.085131	not significant
CSNK1G1	53944	-0.059196	0.72461	0.088146	0.27703	-0.0577405	0.085056	not significant
RDH14	57665	-0.017706	0.95999	0.088126	0.31974	-0.0185045	0.085002	not significant
ABAT	18	0.003066	0.99329	0.088028	0.27703	0.00187438	0.0848595	not significant
FBXO6	26270	-0.047868	0.75996	0.088021	0.29732	-0.0475095	0.084848	not significant
SLC4A4	8671	-0.026438	0.92616	0.088009	0.38766	-0.02762	0.0848085	not significant
SMCO2	341346	0.029604	0.90713	0.087937	0.35824	0.031757	0.084742	not significant
ATP2A3	489	-0.039771	0.87337	0.087933	0.27178	-0.040002	0.0847205	not significant
TGM1	7051	0.024157	0.94191	0.08792	0.24912	0.0254965	0.0846725	not significant
USP5	8078	-0.051932	0.94723	0.087899	0.4646	-0.051344	0.08466	not significant
MUC17	140453	0.011808	0.97454	0.087874	0.29732	0.011393	0.0846285	not significant
TNFAIP1	7126	0.00090605	0.99537	0.087858	0.45141	0.000453025	0.084614	not significant
CLDN20	49861	0.050874	0.71502	0.087849	0.40775	0.054815	0.0846045	not significant
SLC30A4	7782	-0.0014483	0.99533	0.087822	0.29732	-0.000759557	0.084581	not significant
SNX24	28966	-0.0075354	0.98527	0.087794	0.38143	-0.0073309	0.0845395	not significant
CD59	966	-0.012511	0.97454	0.087764	0.38088	-0.0129165	0.0845235	not significant
MFAP3	4238	0.03169	0.89389	0.087558	0.33967	0.03424	0.0844165	not significant
SERPINA12	145264	0.013017	0.9722	0.087552	0.35499	0.012789	0.0843455	not significant
FLVCR2	55640	-0.010192	0.98332	0.08752	0.29792	-0.0101035	0.084283	not significant
RACGAP1	29127	0.15669	0.25539	0.087507	0.30291	0.142475	0.0842045	not significant
OR2T4	127074	-0.033945	0.87876	0.087441	0.32388	-0.0348765	0.0841465	not significant
APOM	55937	0.030975	0.89847	0.087421	0.36717	0.0333815	0.0841005	not significant
KCNF1	3754	0.021711	0.95364	0.087411	0.33044	0.02266	0.0840805	not significant
PITX1	5307	0.0066535	0.98619	0.087393	0.35158	0.00580215	0.084049	not significant
RNF25	64320	0.0087176	0.98269	0.087384	0.38182	0.00814805	0.0839415	not significant
PGAM5	192111	-0.060655	0.58754	0.087379	0.30359	-0.058979	0.083792	not significant
UNC5C	8633	-0.0012974	0.99533	0.087315	0.47381	-0.0006487	0.0837205	not significant
PGM3	5238	-1.0933	1.93e-91	0.087311	0.27297	-0.76917	0.083658	KO negative
ZBTB40	9923	0.092642	0.26581	0.08731	0.32501	0.0948745	0.083657	not significant
PTPRU	10076	0.061705	0.56954	0.087238	0.41814	0.0657755	0.0836105	not significant
ANXA1	301	0.020488	0.94473	0.087228	0.34907	0.0211105	0.0835785	not significant
CIB1	10519	0.030979	0.90912	0.087161	0.64027	0.033399	0.083488	not significant
GDI2	2665	-0.021079	0.94421	0.087156	0.44326	-0.0219555	0.083473	not significant
RPP14	11102	0.028351	0.94898	0.087057	0.38088	0.030377	0.0834175	not significant
GOLM1	51280	-0.036674	0.87549	0.087	0.37595	-0.0374665	0.0833755	not significant
HDAC7	51564	-0.013994	0.9722	0.086949	0.3482	-0.014481	0.08328	not significant
SERPINB4	6318	0.028783	0.92749	0.086902	0.7434	0.03087	0.0832475	not significant
BGLAP	632	0.044457	0.77818	0.086826	0.35992	0.0479965	0.0831435	not significant
CYP2F1	1572	-0.027073	0.92746	0.086785	0.25785	-0.028286	0.0830675	not significant
OR13H1	347468	0.010407	0.97882	0.086682	0.35824	0.0100231	0.083009	not significant
SSTR3	6753	-0.040301	0.82769	0.08667	0.29732	-0.0404655	0.082992	not significant
FZD5	7855	-0.00049224	0.9964	0.086646	0.30312	-0.00024612	0.082976	not significant
UBE2E1	7324	-0.05062	0.70215	0.086602	0.37113	-0.0501695	0.0829305	not significant
TRAF3	7187	0.24881	1.82e-08	0.086579	0.42051	0.201385	0.082898	KO positive
GATA4	2626	-0.037166	0.88482	0.086521	0.32521	-0.0379	0.082837	not significant
ADCK5	203054	-0.0028165	0.99319	0.08646	0.30865	-0.0021531	0.082806	not significant
ZC3H12B	340554	0.065789	0.53338	0.086449	0.27975	0.069973	0.0827705	not significant
ZNF275	10838	0.0045517	0.98841	0.086447	0.33967	0.00345255	0.082765	not significant
ZNF275	105373378	0.0045517	0.98841	0.086447	0.33967	0.00345255	0.082765	not significant
TPSB2	64499	-0.016998	0.9722	0.086308	0.27867	-0.017815	0.0826915	not significant
NMNAT3	349565	-0.01479	0.96338	0.086307	0.32025	-0.015265	0.082668	not significant
DDX46	9879	-0.15277	0.45398	0.086276	0.45299	-0.12136	0.0826375	not significant
UBR2	23304	-0.14818	0.017468	0.086235	0.37298	-0.118532	0.0826105	KO negative
CDK17	5128	-0.069126	0.4656	0.086164	0.3303	-0.06622	0.082558	not significant
GREM1	26585	-0.0043751	0.98961	0.086145	0.37113	-0.0038024	0.0825145	not significant
PAQR4	124222	0.028663	0.94421	0.086102	0.47144	0.0306925	0.082474	not significant
MAP3K14	9020	-0.085608	0.26375	0.086098	0.37892	-0.0783755	0.0824645	not significant
ATAT1	79969	0.045238	0.80307	0.086062	0.27053	0.0488825	0.08243	not significant
TPR	7175	-0.22556	0.00036723	0.086022	0.31042	-0.166025	0.082389	KO negative
DRGX	644168	-0.0069493	0.98619	0.085971	0.36926	-0.00664975	0.082346	not significant
PTPRS	5802	0.0045416	0.98921	0.085949	0.31919	0.0034445	0.08233	not significant
LFNG	3955	0.043014	0.79826	0.085886	0.30359	0.046679	0.08226	not significant
IRX2	153572	-0.031174	0.92616	0.085838	0.37303	-0.032236	0.0822245	not significant
KLHL13	90293	0.0013249	0.99533	0.085817	0.32859	0.00066245	0.08219	not significant
GPR21	2844	0.053268	0.74742	0.085803	0.29884	0.057329	0.082175	not significant
HLX	3142	0.031319	0.9037	0.08565	0.29732	0.033843	0.0820965	not significant
CSF2	1437	-0.032689	0.88738	0.085562	0.33227	-0.0335685	0.082045	not significant
MGAT2	4247	-0.12134	0.097239	0.085488	0.29732	-0.101337	0.0820015	not significant
PRCD	768206	0.036374	0.85661	0.085486	0.44995	0.03947	0.0819595	not significant
PRKAR1A	5573	-0.35659	6.92e-12	0.08548	0.28731	-0.24633	0.0819115	KO negative
ZFYVE1	53349	-0.0658	0.61053	0.085453	0.39306	-0.0634835	0.081898	not significant
MBP	4155	0.01191	0.97454	0.08541	0.35794	0.0114825	0.0818745	not significant
SMPD1	6609	-0.013156	0.9722	0.085393	0.44664	-0.013579	0.081861	not significant
KLHL18	23276	0.019873	0.95418	0.085321	0.38814	0.020401	0.081789	not significant
CHST7	56548	0.049331	0.73761	0.08532	0.3296	0.053022	0.0817815	not significant
METTL7B	196410	-0.057028	0.77853	0.085288	0.41449	-0.0559575	0.0817655	not significant
LRP3	4037	-0.098651	0.12367	0.08523	0.367	-0.0868125	0.0816775	not significant
EFR3B	22979	0.024038	0.94191	0.085196	0.30988	0.025387	0.081643	not significant
ZNF451	26036	-0.047539	0.77818	0.08518	0.38296	-0.0472585	0.0816325	not significant
EME1	146956	0.022882	0.9534	0.085096	0.29444	0.0240845	0.08151	not significant
GABRE	2564	0.010812	0.97633	0.085053	0.35711	0.0103587	0.0814655	not significant
TMEM238	388564	0.035376	0.89123	0.084974	0.40202	0.038377	0.0813755	not significant
DDHD1	80821	0.00704	0.98619	0.084931	0.43391	0.0063149	0.081327	not significant
CHMP5	51510	-0.20077	0.00011414	0.084885	0.8115	-0.150945	0.081304	KO negative
ARID4B	51742	-0.41203	9.88e-20	0.084862	0.29803	-0.277885	0.081275	KO negative
HOXA1	3198	0.081383	0.41977	0.084825	0.38088	0.0846285	0.0812455	not significant
TRIP12	9320	-0.15223	0.0067899	0.084787	0.52093	-0.121049	0.0812	KO negative
GSTO1	9446	-0.0034308	0.99171	0.084778	0.28356	-0.0027373	0.081186	not significant
OSMR	9180	-0.012828	0.97093	0.084748	0.40775	-0.0132905	0.081169	not significant
DPP6	1804	-0.04381	0.78303	0.08469	0.44883	-0.0437375	0.081131	not significant
MTRR	4552	0.2067	0.00011417	0.084662	0.32521	0.17523	0.0810915	KO positive
PRKCH	5583	-0.0020983	0.99533	0.084605	0.41334	-0.00147711	0.081052	not significant
PDZRN3	23024	0.043871	0.80092	0.08458	0.3282	0.047441	0.080956	not significant
TBX18	9096	0.040784	0.89085	0.084501	0.41375	0.044138	0.0808805	not significant
ZDHHC14	79683	0.0051563	0.98619	0.084495	0.41497	0.0040929	0.080867	not significant
GNPNAT1	64841	-0.56477	4.58e-27	0.084479	0.37655	-0.373455	0.0808288	KO negative
EPCAM	4072	0.087501	0.32725	0.084479	0.5278	0.0901865	0.0808288	not significant
HIPK3	10114	0.020267	0.94869	0.084425	0.38756	0.0208525	0.0807485	not significant
MTNR1A	4543	0.035315	0.86608	0.084404	0.38088	0.0382705	0.080728	not significant
PTGER3	5733	0.059277	0.64401	0.084381	0.30304	0.0634475	0.0807105	not significant
ARRB2	409	0.039989	0.81605	0.084365	0.37417	0.0433265	0.0806515	not significant
FGGY	55277	-0.012519	0.97454	0.084289	0.40775	-0.0129525	0.080585	not significant
LRIG3	121227	0.041311	0.80272	0.084246	0.60057	0.0446195	0.0805605	not significant
CSF2RB	1439	0.038742	0.84411	0.08414	0.38169	0.041959	0.080494	not significant
LEMD2	221496	0.076211	0.72761	0.084081	0.2838	0.079712	0.0804375	not significant
PLA2G5	5322	0.033089	0.87684	0.083993	0.29462	0.0359275	0.0803905	not significant
ACOT8	10005	-0.031171	0.89994	0.083915	0.31823	-0.0322175	0.080267	not significant
DNAJC16	23341	-0.0014372	0.99533	0.083809	0.38088	-0.000745824	0.0802105	not significant
BIRC2	329	-0.17579	0.00066987	0.083771	0.31974	-0.135879	0.0801855	KO negative
HSP90AB1	3326	-0.076323	0.48561	0.083743	0.4646	-0.0715655	0.0801695	not significant
GMPPB	29925	-0.35083	0.0054766	0.08373	0.27837	-0.24332	0.0801265	KO negative
IFITM1	8519	-0.0086096	0.98269	0.083716	0.29732	-0.00828665	0.0801155	not significant
MKRN3	7681	0.055589	0.65449	0.083688	0.32501	0.059854	0.080073	not significant
BRSK2	9024	-0.0045496	0.98703	0.083529	0.39418	-0.0039556	0.07998	not significant
ATP6V0E1	8992	0.011745	0.9775	0.083493	0.39418	0.011322	0.079934	not significant
ZCCHC11		0.09102	0.23628	0.083483	0.38814	0.093265	0.079899	not significant
CAPNS1	826	0.034662	0.86356	0.083412	0.4583	0.037414	0.0798585	not significant
USP28	57646	0.01024	0.97882	0.083372	0.44907	0.009766	0.0798375	not significant
ABCB8	11194	0.019492	0.9595	0.083269	0.3282	0.0199965	0.079786	not significant
C1QTNF9	338872	-0.00063891	0.99617	0.083264	0.36926	-0.000319455	0.0797695	not significant
ALG12	79087	0.286	2.79e-11	0.083242	0.52206	0.230255	0.079756	KO positive
EMG1	10436	0.048373	0.89689	0.083241	0.3282	0.0520795	0.079747	not significant
EXO5	64789	0.010555	0.98119	0.083236	0.52064	0.0101278	0.079726	not significant
UCN	7349	-0.033609	0.90047	0.083213	0.38207	-0.034472	0.079712	not significant
SLC39A14	23516	-0.062429	0.64529	0.083174	0.42178	-0.060529	0.0796895	not significant
SCCPDH	51097	-0.035233	0.89389	0.083172	0.38654	-0.0360715	0.0796525	not significant
IPO13	9670	-0.044161	0.92616	0.083171	0.41966	-0.044222	0.079648	not significant
RANBP9	10048	-0.016223	0.97064	0.083101	0.38088	-0.0169015	0.079605	not significant
NKX6-1	4825	0.0069251	0.98619	0.083058	0.34907	0.0061493	0.0795065	not significant
TET1	80312	0.034958	0.85132	0.082969	0.28519	0.037794	0.079441	not significant
TM4SF4	7104	0.014687	0.97064	0.082942	0.31559	0.0146962	0.079413	not significant
TEX264	51368	-0.0012807	0.99533	0.082919	0.37113	-0.00064035	0.079339	not significant
CNTNAP3B	728577	0.043677	0.81423	0.082711	0.3282	0.04723	0.0792245	not significant
PRKD1	5587	-0.047705	0.7995	0.082686	0.45299	-0.047383	0.079211	not significant
NOG	9241	0.035232	0.90345	0.082684	0.51828	0.0381105	0.07918	not significant
NR0B1	190	0.030799	0.90345	0.082678	0.3282	0.0331005	0.0791745	not significant
DHRS2	10202	-0.00063133	0.99628	0.082632	0.3282	-0.000315665	0.0791465	not significant
STX16	8675	0.0043029	0.98869	0.082482	0.38169	0.0032394	0.0790685	not significant
IL1RAPL1	11141	0.01108	0.97454	0.082479	0.45719	0.01063	0.079049	not significant
ARL4C	10123	-0.020205	0.9534	0.082433	0.45388	-0.0211015	0.0790175	not significant
ADAMDEC1	27299	0.027969	0.91775	0.082431	0.52177	0.029981	0.0789845	not significant
CD2	914	-0.0024672	0.99402	0.082372	0.31974	-0.00183795	0.078925	not significant
NR4A1	3164	-0.051109	0.75893	0.082308	0.51601	-0.0506105	0.0788885	not significant
ACOT7	11332	-0.072379	0.55047	0.082243	0.44326	-0.068771	0.078811	not significant
BDH1	622	0.003549	0.99171	0.082189	0.37655	0.002486	0.0787545	not significant
PHKA2	5256	0.036341	0.8679	0.08213	0.38088	0.0394415	0.0787185	not significant
DCLK2	166614	0.007155	0.98619	0.08211	0.38341	0.0064363	0.078682	not significant
PATE3	100169851	0.0058784	0.98779	0.082107	0.49506	0.00495005	0.0786765	not significant
GGCX	2677	-0.0011799	0.99533	0.082089	0.34907	-0.00058995	0.07866	not significant
CLEC12B	387837	0.015988	0.95852	0.081983	0.42909	0.016132	0.0785895	not significant
SYT2	127833	-0.019762	0.94869	0.081921	0.46173	-0.0206835	0.0784665	not significant
CDC34	997	0.21588	1.29e-05	0.081882	0.50442	0.180445	0.078441	KO positive
NEK8	284086	0.050302	0.75542	0.081851	0.38814	0.0541675	0.0784245	not significant
MPP1	4354	-0.0064774	0.98619	0.081832	0.38344	-0.0061493	0.078397	not significant
CRCP	27297	0.0010806	0.99558	0.081765	0.3303	0.0005403	0.078351	not significant
VPS36	51028	-0.20994	0.0011852	0.081762	0.31974	-0.156835	0.078345	KO negative
FRAS1	80144	0.0058984	0.98619	0.081755	0.37892	0.00497845	0.07833	not significant
VTN	7448	0.004489	0.98914	0.081754	0.40051	0.00339045	0.078282	not significant
DKK3	27122	0.013989	0.97454	0.081669	0.37721	0.0138365	0.078166	not significant
DDX52	11056	0.022432	0.97454	0.081546	0.29732	0.023464	0.0780935	not significant
WDFY1	57590	-0.034115	0.88151	0.081436	0.43389	-0.0350405	0.0780355	not significant
RAB33B	83452	-0.015568	0.96484	0.081421	0.64863	-0.016104	0.078015	not significant
MLLT10	8028	-0.10619	0.18993	0.08141	0.36649	-0.091756	0.0779605	not significant
FSTL5	56884	0.0034059	0.99195	0.081382	0.38814	0.00232095	0.077866	not significant
DLX6	1750	0.0022783	0.99533	0.08132	0.30977	0.0011551	0.077829	not significant
PLOD2	5352	0.015122	0.96282	0.08131	0.37047	0.015243	0.0777835	not significant
NT5DC1	221294	0.027399	0.92492	0.081275	0.42932	0.0293125	0.0777605	not significant
ADAM12	8038	-0.0209	0.94421	0.08127	0.45389	-0.021736	0.077751	not significant
SOCS7	30837	-0.036736	0.8679	0.081221	0.51444	-0.0375105	0.0777075	not significant
GYS1	2997	0.062052	0.68203	0.081192	0.34719	0.066245	0.07768	not significant
PLA2G15	23659	-0.040733	0.8351	0.08106	0.32213	-0.0408415	0.077612	not significant
GJB2	2706	0.047866	0.75854	0.08098	0.367	0.051476	0.0775715	not significant
OR52E6	390078	0.019556	0.96023	0.080956	0.38169	0.020081	0.0775283	not significant
NAA15	80155	-0.1033	0.29146	0.080956	0.36363	-0.0898965	0.0775283	not significant
CDK6	1021	-0.24418	1.65e-06	0.080922	0.35079	-0.17655	0.0774675	KO negative
CHD1	1105	-0.50345	3.49e-20	0.080701	0.33197	-0.336255	0.077346	KO negative
CHMP6	79643	-0.13919	0.039469	0.080685	0.51498	-0.112797	0.077314	KO negative
PAQR6	79957	-0.005295	0.98619	0.080609	0.40891	-0.0049363	0.0772515	not significant
TMEM30A	55754	-0.16012	0.0064785	0.080588	0.47737	-0.126249	0.07721	KO negative
RND3	390	0.013257	0.97137	0.08057	0.41614	0.0130802	0.07713	not significant
RNF19A	25897	-0.10013	0.24405	0.080526	0.39685	-0.087813	0.077083	not significant
ZBTB2	57621	-0.57793	1.68e-39	0.080491	0.39994	-0.38158	0.0770615	KO negative
MRC1	4360	0.0040017	0.98961	0.080482	0.30114	0.00294665	0.077028	not significant
OR2V1	26693	0.0033052	0.99139	0.080443	0.40365	0.0021603	0.0770025	not significant
CNTNAP2	26047	-0.015448	0.96023	0.080406	0.44575	-0.015985	0.07696	not significant
TINAG	27283	0.053108	0.75691	0.080386	0.37113	0.0571835	0.076901	not significant
COMTD1	118881	0.05099	0.86356	0.080314	0.45389	0.0549435	0.0768495	not significant
ST6GALNAC4	27090	0.048724	0.79318	0.08025	0.39566	0.05244	0.076814	not significant
PARD6G	84552	-0.0016377	0.99533	0.080199	0.38814	-0.00097473	0.0767655	not significant
CYSTM1	84418	0.0076852	0.98416	0.080095	0.47737	0.00704935	0.076681	not significant
CKMT1B	1159	-0.016147	0.98051	0.080086	0.27703	-0.016812	0.076666	not significant
RESP18	389075	0.048778	0.80107	0.080081	0.34529	0.05248	0.076632	not significant
TMEM237	65062	0.0248	0.92616	0.08006	0.44548	0.026142	0.076616	not significant
AKAP7	9465	-0.010352	0.97721	0.080011	0.40775	-0.0103155	0.0765775	not significant
GGA1	26088	0.0049672	0.98668	0.079969	0.47737	0.0039175	0.0764875	not significant
PLSCR1	5359	-0.011114	0.97624	0.07977	0.37949	-0.011233	0.076351	not significant
SNX21	90203	0.01017	0.97946	0.079652	0.41343	0.00964725	0.0762125	not significant
XKR7	343702	-0.019353	0.95363	0.079553	0.46924	-0.020251	0.0761545	not significant
DLX1	1745	-0.002767	0.99441	0.079501	0.47308	-0.00210225	0.076119	not significant
SCN2A	6326	0.050332	0.75542	0.079457	0.44548	0.054195	0.076069	not significant
MMP23B	8510	-0.083598	0.41159	0.079414	0.38088	-0.0766345	0.0759935	not significant
ST3GAL6	10402	0.064445	0.62862	0.079405	0.3482	0.068395	0.0759885	not significant
SMARCAD1	56916	-0.020085	0.95418	0.079281	0.59415	-0.02101	0.075919	not significant
CRISPLD1	83690	-0.032799	0.89127	0.079264	0.37754	-0.033645	0.075885	not significant
RNF208	727800	0.032439	0.89994	0.079244	0.38101	0.034941	0.075821	not significant
UGT2B4	7363	1.17e-05	0.99994	0.079204	0.39025	5.85e-06	0.075788	not significant
NR2F1	7025	0.031782	0.89415	0.079191	0.36749	0.034315	0.0757605	not significant
TOP1MT	116447	-0.074799	0.45873	0.07916	0.42178	-0.070504	0.075742	not significant
FGR	2268	0.029497	0.90767	0.079145	0.33967	0.031649	0.075729	not significant
SEMA5A	9037	0.055038	0.66781	0.079061	0.44886	0.0591915	0.075666	not significant
ZNF728	388523	0.013483	0.97111	0.079034	0.4088	0.0133575	0.0756415	not significant
VARS2	57176	-0.17227	0.061229	0.079012	0.36363	-0.133771	0.0756215	not significant
GCGR	2642	-0.0094593	0.9804	0.078993	0.45719	-0.00923	0.07561	not significant
SLC25A3	5250	-0.083898	0.80716	0.078983	0.40775	-0.0769335	0.0756025	not significant
UBL3	5412	0.0049517	0.98668	0.078975	0.32977	0.00387495	0.0755345	not significant
ALAD	210	0.07481	0.39277	0.078965	0.40684	0.078282	0.0755145	not significant
KAT6B	23522	0.052798	0.65458	0.078959	0.4088	0.0568365	0.0755055	not significant
CD69	969	-0.028636	0.93016	0.078936	0.43213	-0.029714	0.0754525	not significant
PPM1H	57460	-0.0054872	0.98619	0.078931	0.41814	-0.00509765	0.075436	not significant
NRP2	8828	-0.013233	0.9722	0.078884	0.4646	-0.013678	0.0753975	not significant
METTL13		0.03304	0.90022	0.078876	0.38588	0.035865	0.07538	not significant
DNAJC9	23234	0.19383	0.00063131	0.078833	0.37754	0.16691	0.0753145	KO positive
RNF152	220441	-0.058078	0.62728	0.078832	0.45611	-0.056911	0.0752885	not significant
INSM2	84684	0.21621	0.0001651	0.078823	0.48504	0.180945	0.075244	KO positive
IL17RC	84818	0.041868	0.87876	0.078771	0.44548	0.045464	0.0751795	not significant
DNAJC1	64215	0.033378	0.9024	0.07876	0.39685	0.0362515	0.075164	not significant
CTBP1	1487	0.021697	0.94191	0.078757	0.5278	0.0226515	0.0751285	not significant
HK1	3098	0.065142	0.51737	0.078756	0.45287	0.0693545	0.0751235	not significant
SEMA6D	80031	0.046145	0.75542	0.078709	0.367	0.049685	0.0750545	not significant
KDM1B	221656	0.11088	0.047338	0.078663	0.72555	0.109635	0.075007	KO positive
RARG	5916	-0.070118	0.43905	0.078662	0.34788	-0.066925	0.0749475	not significant
LPGAT1	9926	0.063068	0.55448	0.078552	0.39418	0.0672205	0.0748865	not significant
MAL2	114569	0.00081238	0.99542	0.078536	0.52508	0.00040619	0.0748735	not significant
PLD2	5338	0.017884	0.96023	0.078527	0.39306	0.018264	0.074847	not significant
MYADM	91663	-0.023542	0.94191	0.078508	0.38088	-0.024454	0.0748285	not significant
GALNT7	51809	-0.0072449	0.98577	0.0785	0.37754	-0.00707395	0.074803	not significant
CCL23	6368	-0.0094085	0.98269	0.07849	0.45666	-0.0091386	0.074793	not significant
MEGF8	1954	0.018533	0.95548	0.078464	0.36649	0.018932	0.0747775	not significant
POU2F3	25833	0.029376	0.91348	0.078447	0.37892	0.0315395	0.074764	not significant
HPGD	3248	0.03866	0.85315	0.078424	0.38588	0.0418825	0.074734	not significant
PTPRH	5794	-0.014064	0.96923	0.078341	0.3901	-0.0145885	0.0746865	not significant
DIO3	1735	0.014877	0.96637	0.07833	0.41966	0.014986	0.074673	not significant
S100A9	6280	0.03075	0.90832	0.078325	0.34907	0.0330555	0.074669	not significant
SLC8A2	6543	0.023155	0.94421	0.078287	0.32538	0.024377	0.0746165	not significant
TK2	7084	-0.05469	0.7259	0.078241	0.40741	-0.0539315	0.074586	not significant
PIP4K2B	8396	0.064564	0.5877	0.078205	0.39132	0.0686145	0.074558	not significant
C1RL	51279	0.031306	0.89565	0.078201	0.40775	0.033825	0.074552	not significant
ASPG	374569	0.023777	0.94377	0.07817	0.38088	0.0251305	0.074508	not significant
MANSC4	100287284	0.026875	0.93565	0.078131	0.37187	0.02869	0.0744632	not significant
BAIAP2L2	80115	-0.030746	0.91348	0.078131	0.51444	-0.0318515	0.0744632	not significant
NOS2	4843	0.023529	0.94057	0.078093	0.38504	0.0248595	0.074416	not significant
ERRFI1	54206	-0.0096575	0.98176	0.078081	0.45788	-0.0093922	0.074401	not significant
PTPDC1	138639	-0.044501	0.79318	0.078065	0.35079	-0.0445395	0.0743895	not significant
INPPL1	3636	0.065857	0.47422	0.078058	0.42126	0.0700915	0.074353	not significant
MAP3K13	9175	0.054707	0.73522	0.078043	0.46051	0.0587105	0.074342	not significant
TMEM243	79161	-0.0026056	0.99338	0.077979	0.4396	-0.0019653	0.0742875	not significant
PGLS	25796	0.19167	0.00079115	0.077918	0.35666	0.165535	0.0742475	KO positive
KRTDAP	388533	-0.0080682	0.98332	0.077909	0.33599	-0.0077936	0.074191	not significant
CRYL1	51084	-0.015403	0.96023	0.0779	0.45719	-0.015926	0.074184	not significant
FZD4	8322	-0.0035921	0.99125	0.07781	0.39847	-0.00293085	0.074066	not significant
SLC7A6	9057	-0.049105	0.7328	0.077744	0.44024	-0.048834	0.073997	not significant
CDKAL1	54901	-0.077174	0.31106	0.077728	0.41449	-0.072232	0.0739685	not significant
AATF	26574	0.14632	0.16206	0.077645	0.44515	0.136465	0.073882	not significant
B3GNT2	10678	-0.10616	0.079591	0.077634	0.40036	-0.091727	0.073869	not significant
ZNF516	9658	0.011724	0.97454	0.077614	0.58049	0.011306	0.0738505	not significant
TMIE	259236	0.012149	0.97454	0.0776	0.54307	0.011723	0.0738395	not significant
AMPH	273	0.043254	0.82331	0.077586	0.4088	0.046903	0.0738255	not significant
TTLL3	26140	-0.021184	0.9436	0.077474	0.42902	-0.0221415	0.073754	not significant
PGPEP1L	145814	0.0070142	0.98619	0.077458	0.41955	0.00628515	0.073725	not significant
TGFB3	7043	-0.0056597	0.98619	0.077416	0.4225	-0.00530175	0.073693	not significant
RECK	8434	-0.019954	0.94473	0.077407	0.4646	-0.020877	0.0736885	not significant
NCSTN	23385	-0.13754	0.064697	0.077374	0.58512	-0.111525	0.0736405	not significant
STRN	6801	-0.029157	0.92122	0.077364	0.37929	-0.0302515	0.0736075	not significant
RAB11FIP1	80223	0.026616	0.94191	0.077351	0.46076	0.0282175	0.073571	not significant
MIOX	55586	-0.024805	0.9354	0.077262	0.39382	-0.0258145	0.073512	not significant
HIVEP1	3096	-0.057618	0.59518	0.077194	0.37047	-0.056554	0.0734485	not significant
AMZ2	51321	-0.010704	0.98005	0.077191	0.52292	-0.010683	0.0734145	not significant
MASP2	10747	0.051571	0.73536	0.077128	0.43213	0.055694	0.0733575	not significant
KCNA4	3739	0.0013608	0.99533	0.077117	0.42393	0.0006804	0.0733265	not significant
C1QTNF9B	387911	0.010312	0.98269	0.077073	0.40202	0.00989588	0.0732855	not significant
MASTL	84930	-0.054159	0.89581	0.077051	0.37723	-0.0532775	0.0732685	not significant
SRR	63826	-0.03824	0.90345	0.077044	0.56171	-0.0387645	0.073255	not significant
ZBTB26	57684	0.028531	0.91035	0.077024	0.37892	0.030484	0.073243	not significant
FUCA1	2517	0.027206	0.91775	0.077006	0.51498	0.0290295	0.0731975	not significant
SPATA9	83890	0.013124	0.97301	0.076968	0.35711	0.012903	0.0731495	not significant
SAP130	79595	-0.13889	0.041061	0.076961	0.45294	-0.112615	0.073122	KO negative
CYP8B1	1582	0.029366	0.90555	0.076899	0.4191	0.031533	0.0730575	not significant
DICER1	23405	0.052363	0.79534	0.076847	0.41955	0.056383	0.0730255	not significant
PIP4K2A	5305	-0.079892	0.34365	0.076844	0.47737	-0.074393	0.0729925	not significant
CDC14B	8555	0.084177	0.33159	0.076843	0.41598	0.0870025	0.072982	not significant
GMPR	2766	-0.0031449	0.99195	0.076794	0.40738	-0.00246765	0.072925	not significant
ASPHD1	253982	-0.013805	0.9722	0.076733	0.43111	-0.014296	0.072894	not significant
ZNF573	126231	-0.013609	0.97301	0.076704	0.44886	-0.014097	0.072855	not significant
ABHD14A	25864	-0.018382	0.97064	0.076701	0.37655	-0.0192565	0.0728445	not significant
PIGL	9487	-0.053656	0.74207	0.076688	0.4346	-0.0528925	0.072823	not significant
ACRBP	84519	0.0022688	0.99533	0.076678	0.45432	0.00113926	0.0728105	not significant
ACR	49	0.005324	0.98619	0.076625	0.39291	0.00427575	0.072761	not significant
FGFRL1	53834	-0.099339	0.12459	0.076604	0.42178	-0.087287	0.072713	not significant
CHD2	1106	-0.14038	0.0066291	0.076533	0.39415	-0.113719	0.0726745	KO negative
SMURF2	64750	0.024221	0.94057	0.076493	0.51601	0.025551	0.0726195	not significant
CLDN11	5010	-0.053687	0.69491	0.076449	0.41449	-0.0529105	0.0725575	not significant
PAX8	7849	-0.01274	0.97995	0.076399	0.51864	-0.0132055	0.0725145	not significant
HYAL1	3373	-0.01662	0.96023	0.076381	0.38088	-0.0174163	0.072505	not significant
CRHR2	1395	0.059284	0.58481	0.076369	0.38341	0.063464	0.0724385	not significant
SQLE	6713	-0.009892	0.98005	0.076368	0.4088	-0.0097329	0.0724365	not significant
SLC41A1	254428	0.027261	0.92616	0.076352	0.42126	0.029119	0.0724245	not significant
PTPRR	5801	-0.037036	0.87684	0.076349	0.43213	-0.0377525	0.072417	not significant
ROCK1	6093	-0.085097	0.43042	0.076345	0.45986	-0.0780275	0.0723845	not significant
FAM86C1		-0.01081	0.98119	0.076323	0.3901	-0.010824	0.072359	not significant
EPN1	29924	-0.044609	0.85724	0.076307	0.4225	-0.0446755	0.0723485	not significant
SENP3	26168	-0.12913	0.019912	0.076289	0.45299	-0.106205	0.0723285	KO negative
KCNJ12	3768	0.029089	0.92749	0.07628	0.47103	0.031256	0.0723215	not significant
OR4A15	81328	-0.011384	0.97454	0.076277	0.37113	-0.01152	0.072284	not significant
OR9K2	441639	0.0076655	0.98401	0.076275	0.42978	0.00700895	0.072217	not significant
PODXL	5420	0.00072256	0.99558	0.076259	0.45666	0.00036128	0.07219	not significant
PCYT1B	9468	-0.015717	0.96023	0.076242	0.40642	-0.016248	0.072174	not significant
SYCN	342898	0.012918	0.97822	0.076209	0.46158	0.012703	0.0721385	not significant
NFIX	4784	-0.044243	0.80937	0.076194	0.5144	-0.0443175	0.072123	not significant
GTF2F1	2962	-0.38253	2.69e-18	0.076177	0.4646	-0.26063	0.0720555	KO negative
RBX1	9978	0.16625	0.53715	0.076174	0.43387	0.14939	0.072046	not significant
MAP2K7	5609	-0.14214	0.0078111	0.076156	0.46173	-0.11477	0.072024	KO negative
POLG	5428	-0.13803	0.14223	0.076152	0.44575	-0.111989	0.0720145	not significant
HERC6	55008	0.042456	0.84088	0.076132	0.42982	0.0461175	0.071912	not significant
PELI3	246330	0.027187	0.92616	0.076123	0.38088	0.0290085	0.0719055	not significant
STK36	27148	0.0028251	0.99319	0.076116	0.39566	0.00166673	0.0718905	not significant
CD274	29126	-0.02362	0.93687	0.076105	0.38814	-0.024553	0.071879	not significant
SBK1	388228	-0.027577	0.93504	0.076029	0.37605	-0.0287405	0.071839	not significant
FAM213A		-0.025405	0.92616	0.076027	0.38088	-0.0265525	0.0718135	not significant
KLHL22	84861	-0.078597	0.34216	0.075992	0.40757	-0.073339	0.0717635	not significant
OR51D1	390038	0.040426	0.82576	0.075991	0.39801	0.0437375	0.071752	not significant
GPR158	57512	0.0036693	0.98961	0.075966	0.40051	0.0026259	0.071712	not significant
METTL7A	25840	0.039036	0.868	0.075953	0.3699	0.0423245	0.0717025	not significant
ACYP1	97	-0.065578	0.65374	0.075944	0.42909	-0.0632475	0.071685	not significant
ABCD2	225	0.037531	0.84592	0.075943	0.48561	0.0406535	0.0716525	not significant
PPM1B	5495	0.047063	0.81122	0.075876	0.39018	0.0506315	0.0716	not significant
UBXN6	80700	-0.052789	0.73058	0.075825	0.57924	-0.0522665	0.071572	not significant
TAS2R14	50840	-0.030827	0.90713	0.075772	0.38814	-0.031923	0.0715395	not significant
TAS2R14	106707243	-0.030827	0.90713	0.075772	0.38814	-0.031923	0.0715395	not significant
ZNF236	7776	-0.1001	0.25449	0.075762	0.4088	-0.0877945	0.071447	not significant
RBCK1	10616	-0.23266	3.96e-06	0.075721	0.58696	-0.17017	0.0714185	KO negative
NOXO1	124056	0.035288	0.88728	0.075703	0.41497	0.038186	0.071409	not significant
UBR5	51366	-0.11982	0.091999	0.075676	0.41449	-0.100472	0.071351	not significant
TMEM59	9528	-0.0068711	0.98619	0.075673	0.69297	-0.00657705	0.0713085	not significant
SKP1	6500	0.039758	0.94155	0.075666	0.42923	0.043148	0.071292	not significant
CTAGE1	64693	-0.032889	0.88728	0.075625	0.44164	-0.033736	0.0712215	not significant
PLA2G6	8398	-0.045762	0.78261	0.075624	0.49431	-0.0457025	0.0712145	not significant
PIK3R5	23533	0.025372	0.94057	0.075576	0.52427	0.0267635	0.0711885	not significant
ZDHHC17	23390	-0.025149	0.9342	0.075573	0.53396	-0.026273	0.071175	not significant
ETV1	2115	0.025419	0.92806	0.075542	0.40899	0.0268075	0.0711435	not significant
MGST1	4257	0.015036	0.96562	0.075481	0.35958	0.015188	0.071108	not significant
C2orf88	84281	0.039779	0.83485	0.07548	0.43391	0.0431615	0.071107	not significant
LZTFL1	54585	-0.011451	0.98051	0.075471	0.43391	-0.01159	0.0710865	not significant
ROBO3	64221	0.056203	0.69491	0.075424	0.40277	0.06054	0.07103	not significant
SUSD3	203328	0.053371	0.71467	0.075405	0.4249	0.0574	0.0709875	not significant
ZFP3	124961	0.016237	0.95897	0.07532	0.45155	0.0164195	0.0709445	not significant
PLCB3	5331	-0.089851	0.3865	0.075285	0.4646	-0.081223	0.070922	not significant
OTOS	150677	-0.066015	0.45869	0.075121	0.45611	-0.063614	0.0708245	not significant
ALDH9A1	223	0.10423	0.22306	0.075085	0.43648	0.10359	0.0707935	not significant
CRB2	286204	0.018159	0.96923	0.075054	0.4657	0.018581	0.070766	not significant
CACNA1E	777	0.02019	0.94869	0.075002	0.42026	0.0207915	0.070706	not significant
C19orf38	255809	0.012699	0.97454	0.074878	0.47256	0.0124345	0.0706325	not significant
LY6H	4062	-0.068189	0.43052	0.074863	0.50835	-0.065584	0.0706245	not significant
SEPSECS	51091	0.18399	0.0024539	0.074858	0.46423	0.16041	0.070592	KO positive
KLHL25	64410	0.032513	0.8983	0.074854	0.5278	0.0350295	0.070585	not significant
CYP26C1	340665	-0.080219	0.41752	0.07479	0.42932	-0.0745935	0.0705225	not significant
PDIA3	2923	-0.12901	0.032867	0.074789	0.59233	-0.106119	0.0705085	KO negative
RCBTB1	55213	-0.029451	0.91724	0.07473	0.4646	-0.030572	0.0704445	not significant
SLC6A12	6539	0.039348	0.82576	0.074692	0.46762	0.0426262	0.0704235	not significant
TMEM127	55654	-0.034233	0.88728	0.074652	0.57674	-0.0351485	0.0703945	not significant
TRH	7200	-0.0052013	0.98619	0.074596	0.42126	-0.00483595	0.070357	not significant
DLD	1738	-0.15706	0.0090627	0.074542	0.45389	-0.124333	0.0702755	KO negative
ZKSCAN5	23660	0.025104	0.93687	0.07453	0.51498	0.0264	0.0702485	not significant
F13B	2165	-0.050994	0.73792	0.074507	0.4646	-0.0505145	0.0702325	not significant
CRB3	92359	0.0021138	0.99533	0.074491	0.38208	0.0010569	0.070205	not significant
KCNN4	3783	0.029251	0.92616	0.074456	0.41113	0.031414	0.0701845	not significant
OXNAD1	92106	-0.016729	0.95828	0.074433	0.3901	-0.017514	0.0701675	not significant
RDH13	112724	-0.038747	0.8707	0.074368	0.45294	-0.0392395	0.0701275	not significant
COL14A1	7373	-0.079302	0.27632	0.074367	0.53521	-0.074048	0.0701185	not significant
GGPS1	9453	0.044644	0.96023	0.074326	0.61433	0.048297	0.0700915	not significant
FER	2241	0.041713	0.81975	0.074315	0.44207	0.0452515	0.0700815	not significant
TRIM72	493829	-0.015412	0.97071	0.074312	0.45611	-0.0159505	0.07008	not significant
APOBEC2	10930	-0.011806	0.9775	0.074236	0.37949	-0.0121385	0.0700315	not significant
HAMP	57817	0.036327	0.86356	0.074215	0.40826	0.0394165	0.070005	not significant
CDC25C	995	0.011586	0.97503	0.074157	0.41229	0.011174	0.069973	not significant
PHF8	23133	-0.087112	0.38618	0.074135	0.64221	-0.0794445	0.0699605	not significant
TRIM58	25893	0.045704	0.79988	0.07411	0.51893	0.0492735	0.069923	not significant
MRPL44	65080	-0.18488	0.0013657	0.074085	0.41449	-0.14103	0.0699085	KO negative
PPP1R10	5514	-0.60864	2.79e-25	0.074048	0.46173	-0.399545	0.069873	KO negative
CLEC18A	348174	-0.050301	0.81415	0.074047	0.46076	-0.0497965	0.0698525	not significant
MGEA5		-0.34408	8.99e-13	0.073997	0.42026	-0.238595	0.069758	KO negative
KCNT1	57582	-0.012508	0.97454	0.073963	0.44515	-0.0129065	0.069723	not significant
FBXO42	54455	-0.51908	2.57e-25	0.073953	0.49024	-0.34667	0.069711	KO negative
B4GALNT2	124872	-0.038927	0.85922	0.073942	0.46158	-0.039355	0.069673	not significant
ST3GAL2	6483	-0.002243	0.99533	0.073938	0.44188	-0.00158764	0.069628	not significant
SCN5A	6331	0.059647	0.58619	0.073924	0.41894	0.0638565	0.0696085	not significant
ATP6V0D1	9114	0.10609	0.7227	0.073921	0.4346	0.105465	0.069581	not significant
HDAC11	79885	-0.0203	0.94728	0.073872	0.49314	-0.0211838	0.069555	not significant
MPDZ	8777	0.018906	0.94869	0.073766	0.46924	0.019365	0.069481	not significant
DDX51	317781	-0.27686	0.11313	0.073662	0.44548	-0.19742	0.06942	not significant
DCP1B	196513	0.012747	0.97597	0.0736	0.45299	0.0125005	0.069372	not significant
DDX20	11218	-0.12699	0.09353	0.073567	0.42909	-0.104878	0.0693545	not significant
DYSF	8291	-0.023915	0.93831	0.073548	0.4913	-0.0248578	0.0693445	not significant
IL27	246778	0.0067343	0.98619	0.073526	0.45095	0.00587795	0.069318	not significant
RILP	83547	-0.039896	0.81605	0.073502	0.42319	-0.040146	0.06929	not significant
EEF2K	29904	-0.0053209	0.98619	0.073385	0.45719	-0.00496455	0.069223	not significant
LGR5	8549	0.050365	0.71193	0.073338	0.41966	0.0542285	0.0691965	not significant
PCK1	5105	0.058277	0.63978	0.073333	0.46259	0.062487	0.0691875	not significant
SLC7A13	157724	0.051036	0.75542	0.073302	0.38182	0.0549905	0.069149	not significant
ACSL4	2182	-0.065834	0.53715	0.073244	0.49431	-0.0635065	0.0691195	not significant
TYW3	127253	-0.012351	0.97301	0.073206	0.59467	-0.012706	0.069071	not significant
PTPRG	5793	0.028965	0.91724	0.073176	0.5278	0.0310975	0.0690535	not significant
CNPY4	245812	-0.031983	0.91395	0.073025	0.41955	-0.0329035	0.0689705	not significant
PLD1	5337	0.0057602	0.98619	0.072991	0.47833	0.00478935	0.068928	not significant
SNED1	25992	-0.02902	0.92458	0.072887	0.45389	-0.030034	0.068852	not significant
NCAM1	4684	-0.0058786	0.98619	0.072807	0.43389	-0.00551	0.068746	not significant
GRM4	2914	-0.028805	0.92616	0.072759	0.40899	-0.029849	0.0687215	not significant
CHRNA10	57053	-0.023515	0.93738	0.072737	0.42909	-0.024433	0.0687025	not significant
DDX10	1662	-0.10483	0.89581	0.072714	0.47478	-0.090768	0.068689	not significant
PRKCE	5581	-0.094602	0.22836	0.072683	0.59415	-0.0841635	0.068632	not significant
OR6N1	128372	-0.025505	0.92749	0.072668	0.48124	-0.026657	0.0686235	not significant
TTC7A	57217	-0.020351	0.94377	0.072665	0.48561	-0.021217	0.0686145	not significant
TMEM234	56063	-0.0016863	0.99533	0.072614	0.45299	-0.00109596	0.06858	not significant
HADH	3033	0.030646	0.91724	0.072613	0.58049	0.0329095	0.0685775	not significant
SLC9A2	6549	-0.052162	0.7445	0.072547	0.4646	-0.051674	0.068537	not significant
IPMK	253430	-0.69212	9.88e-40	0.072526	0.58484	-0.456315	0.0685205	KO negative
MAP3K12	7786	-0.017097	0.96023	0.072473	0.49431	-0.017926	0.068493	not significant
MAP3K2	10746	-0.34777	1.61e-15	0.072458	0.47401	-0.241365	0.0684615	KO negative
SLC25A23	79085	0.027407	0.92616	0.072451	0.45881	0.0293205	0.068456	not significant
RGS6	9628	-0.0050332	0.98619	0.072345	0.51498	-0.00452185	0.068395	not significant
C20orf141	128653	-0.011286	0.97882	0.072301	0.38588	-0.0113835	0.068366	not significant
SLC22A8	9376	-0.0036111	0.99125	0.072237	0.45299	-0.00295195	0.0683225	not significant
IMPDH2	3615	-0.07032	0.84979	0.072233	0.60379	-0.0670935	0.0683125	not significant
SOX6	55553	0.01554	0.96562	0.072227	0.43491	0.0156275	0.0683045	not significant
DNMT1	1786	-0.19022	0.1058	0.072213	0.45287	-0.144429	0.068284	not significant
F8	2157	0.0045624	0.98703	0.072204	0.49745	0.0034579	0.0682595	not significant
SSH1	54434	-0.01698	0.96235	0.072167	0.41994	-0.0177675	0.0682015	not significant
SCTR	6344	0.0011492	0.99533	0.072158	0.43355	0.0005746	0.068192	not significant
RPS6KA4	8986	0.016358	0.96501	0.072126	0.41955	0.016567	0.0681645	not significant
AKR1A1	10327	-0.00090543	0.99537	0.072126	0.4646	-0.000452715	0.0681645	not significant
PDX1	3651	0.0197	0.95771	0.07211	0.42909	0.020215	0.068154	not significant
PRSS16	10279	0.019572	0.95418	0.072104	0.46061	0.0201035	0.0681505	not significant
BMPR1A	657	0.065958	0.58157	0.072049	0.51498	0.0702325	0.0681095	not significant
B3GALT4	8705	-0.02308	0.94191	0.072023	0.48371	-0.0239955	0.0680935	not significant
GPR142	350383	0.0098377	0.98269	0.072022	0.4646	0.00928555	0.0680315	not significant
UCN3	114131	0.029349	0.90274	0.072019	0.38814	0.031511	0.0680115	not significant
SLC27A2	11001	0.022783	0.94063	0.072017	0.43389	0.023937	0.0680035	not significant
CCL1	6346	-0.051272	0.70215	0.072013	0.44469	-0.050766	0.0679695	not significant
UXS1	80146	0.025213	0.94191	0.071988	0.51498	0.0265275	0.0679525	not significant
DECR2	26063	0.0403	0.81836	0.071957	0.46423	0.0436465	0.067915	not significant
MC4R	4160	0.022843	0.94057	0.071955	0.48214	0.0240325	0.067905	not significant
NISCH	11188	0.017372	0.95495	0.07195	0.54688	0.0176165	0.0679	not significant
SPOCK3	50859	-0.050206	0.77254	0.071941	0.46943	-0.0497005	0.0678945	not significant
CH25H	9023	0.044286	0.78458	0.071938	0.45611	0.0478235	0.067864	not significant
CDC42EP4	23580	0.062589	0.5683	0.07192	0.54358	0.0668545	0.067855	not significant
ZPBP2	124626	-0.059164	0.67751	0.071903	0.52135	-0.057715	0.067804	not significant
LNPEP	4012	-0.023671	0.94204	0.071799	0.46061	-0.024597	0.0677515	not significant
GATC	283459	0.010397	0.98577	0.071765	0.4646	0.0100097	0.067714	not significant
LYG1	129530	-0.0048242	0.98841	0.071741	0.45432	-0.00425255	0.067683	not significant
ASB8	140461	0.013861	0.96655	0.07166	0.43675	0.0136915	0.0676395	not significant
KCNMB4	27345	-0.045515	0.7995	0.071638	0.64027	-0.0454615	0.067578	not significant
ARHGEF1	9138	-0.053382	0.65374	0.071627	0.41894	-0.0527055	0.0675435	not significant
ARHGEF1	100505585	-0.053382	0.65374	0.071627	0.41894	-0.0527055	0.0675435	not significant
OR5K2	402135	0.0060088	0.98619	0.071618	0.50147	0.0050938	0.067496	not significant
ANXA2	302	0.043256	0.81836	0.071612	0.62005	0.046906	0.0674555	not significant
SYNPO	11346	0.022225	0.94337	0.071595	0.41955	0.0232195	0.067435	not significant
CCL5	6352	-0.05068	0.73792	0.071583	0.40202	-0.0502305	0.0674155	not significant
TMEM131	23505	-0.057249	0.63853	0.071574	0.58512	-0.0560795	0.067406	not significant
P2RY4	5030	0.024155	0.93188	0.071508	0.46423	0.025491	0.0673615	not significant
PREX1	57580	0.027878	0.92463	0.0715	0.4646	0.029828	0.0673373	not significant
ENDOD1	23052	0.046785	0.80716	0.0715	0.63004	0.0502872	0.0673373	not significant
NDUFAF5	79133	-0.21546	7.62e-06	0.071463	0.40775	-0.15992	0.067292	KO negative
SLC41A2	84102	-0.04229	0.80716	0.071416	0.4583	-0.042194	0.067265	not significant
EPB41L5	57669	0.10559	0.06518	0.071383	0.49229	0.10487	0.0672395	not significant
SMARCC2	6601	0.052301	0.69641	0.071373	0.42978	0.0563495	0.0672205	not significant
TMEM69	51249	-0.029271	0.92492	0.071329	0.41994	-0.030436	0.0671915	not significant
FRMPD1	22844	0.070577	0.45794	0.071322	0.59016	0.0742475	0.0671485	not significant
CD72	971	0.0050574	0.98916	0.071294	0.46485	0.0040227	0.067102	not significant
RXRB	6257	0.052835	0.73434	0.071254	0.46259	0.056912	0.0670815	not significant
KCNH4	23415	-0.010173	0.9804	0.071239	0.44354	-0.0100514	0.067068	not significant
UBIAD1	29914	-0.20844	2.31e-05	0.071224	0.4646	-0.15577	0.0670295	KO negative
MXRA8	54587	-0.075234	0.54349	0.071224	0.48493	-0.070802	0.0670295	not significant
TBX1	6899	-0.033296	0.90478	0.0712	0.4897	-0.0342295	0.066995	not significant
PPM1J	333926	0.071044	0.70291	0.07118	0.45299	0.074734	0.0669585	not significant
BDKRB2	624	0.015868	0.96023	0.071161	0.45141	0.016012	0.066948	not significant
PLEKHA8	84725	0.056529	0.63542	0.071154	0.57476	0.0608195	0.0669315	not significant
TFRC	7037	-0.054326	0.94191	0.07112	0.46275	-0.053503	0.0668545	not significant
SEC11C	90701	-0.057378	0.79818	0.071067	0.41449	-0.0563735	0.0668035	not significant
PADI1	29943	-0.039624	0.83527	0.071034	0.5278	-0.0398615	0.066785	not significant
SLC4A7	9497	0.015536	0.97064	0.071022	0.51873	0.0156245	0.0667785	not significant
STXBP5L	9515	-0.023087	0.94057	0.071016	0.4249	-0.0240152	0.066771	not significant
CFHR4	10877	0.042539	0.80554	0.070995	0.46173	0.046187	0.0667505	not significant
PEX13	5194	0.040901	0.80694	0.070961	0.71833	0.044268	0.0667305	not significant
ZNF708	7562	0.023057	0.94081	0.070956	0.48473	0.024265	0.0667195	not significant
NTSR2	23620	0.017832	0.95828	0.070921	0.45141	0.0181935	0.0666845	not significant
GPR35	2859	-0.070119	0.4839	0.070912	0.50291	-0.0669785	0.066659	not significant
TDRD9	122402	0.020598	0.94869	0.070903	0.59415	0.0212725	0.06664	not significant
DGAT1	8694	-0.040635	0.82678	0.070892	0.46943	-0.040754	0.0666345	not significant
ST3GAL3	6487	0.040043	0.82809	0.070884	0.44024	0.043375	0.066623	not significant
WFDC2	10406	-0.057355	0.7514	0.070804	0.49609	-0.0563495	0.066573	not significant
FTH1	2495	0.16564	0.0010509	0.070802	0.51444	0.148725	0.066563	KO positive
CUX2	23316	0.057177	0.66021	0.070748	0.56198	0.061484	0.0665115	not significant
PLIN3	10226	-0.081184	0.38148	0.070665	0.46173	-0.075186	0.0664655	not significant
OR4M2	390538	-0.0074026	0.98619	0.070631	0.49813	-0.00720765	0.0664385	not significant
BRCC3	79184	-0.020005	0.94473	0.070619	0.45611	-0.020933	0.0664145	not significant
OR6N2	81442	0.025125	0.92616	0.070606	0.45287	0.0264335	0.066382	not significant
PAK6	56924	-0.002851	0.99319	0.070534	0.49431	-0.0022281	0.066333	not significant
PAK6	106821730	-0.002851	0.99319	0.070534	0.49431	-0.0022281	0.066333	not significant
CHD9	80205	-0.012221	0.97454	0.070519	0.41955	-0.012594	0.066309	not significant
ZFAT	57623	-0.0073581	0.98619	0.070515	0.49431	-0.00717145	0.066306	not significant
TNN	63923	0.070104	0.52756	0.07051	0.57751	0.073869	0.0663	not significant
ATG3	64422	-0.37697	2.87e-14	0.070438	0.58512	-0.257685	0.066245	KO negative
PDGFC	56034	0.032371	0.89669	0.070427	0.59415	0.0348885	0.066218	not significant
DUSP10	11221	-0.021035	0.94869	0.070397	0.45389	-0.021924	0.066183	not significant
XDH	7498	0.00091854	0.99537	0.070238	0.48954	0.00045927	0.0660935	not significant
CPNE1	8904	-0.017725	0.95852	0.070201	0.4646	-0.0185445	0.0660655	not significant
ADCYAP1	116	0.005982	0.98619	0.070184	0.54996	0.00504875	0.0660385	not significant
CDH9	1007	-0.020507	0.94509	0.070175	0.47144	-0.021388	0.066031	not significant
OR2F1	26211	-0.034331	0.86111	0.070145	0.41894	-0.0352245	0.0660095	not significant
MGAT3	4248	0.0038764	0.99076	0.070069	0.52427	0.0028127	0.0659605	not significant
IL5RA	3568	0.02584	0.93153	0.070066	0.48512	0.0272335	0.065949	not significant
NKX2-6	137814	0.018978	0.9515	0.070053	0.46173	0.01944	0.0659395	not significant
MACROD1	28992	-0.054276	0.77139	0.069991	0.40899	-0.0533865	0.0659055	not significant
OR3A1	4994	0.032654	0.89574	0.069941	0.45299	0.0352485	0.065873	not significant
PRICKLE1	144165	0.038985	0.83376	0.069898	0.55464	0.042223	0.0658425	not significant
KDM6B	23135	0.011404	0.97995	0.069885	0.45155	0.010993	0.0658225	not significant
RARS2	57038	-0.067808	0.69498	0.069846	0.46076	-0.0651245	0.0657755	not significant
ZNF780B	163131	0.052633	0.69491	0.069822	0.41894	0.056689	0.065752	not significant
AGPAT4	56895	-0.017186	0.95852	0.069819	0.47885	-0.0180185	0.0657265	not significant
MID1	4281	0.026692	0.92031	0.069805	0.53396	0.0283105	0.0657055	not significant
PHF21A	51317	-0.0304	0.91387	0.069799	0.47833	-0.031531	0.0656765	not significant
UBE2B	7320	0.023729	0.94809	0.069777	0.66249	0.025075	0.065654	not significant
IL2RB	3560	-0.02019	0.95418	0.069768	0.46329	-0.0210905	0.0656275	not significant
DISC1	27185	-0.055394	0.72485	0.069744	0.54996	-0.0545625	0.0656125	not significant
NR1H3	10062	-0.011246	0.97454	0.0697	0.46076	-0.011352	0.0655715	not significant
KITLG	4254	0.018069	0.95852	0.069674	0.43721	0.0184785	0.0655475	not significant
LANCL2	55915	0.0089622	0.98527	0.069666	0.52661	0.00836335	0.0655385	not significant
OR52K1	390036	-0.052203	0.69392	0.069636	0.46259	-0.0517495	0.06551	not significant
HLA-G	3135	0.0086026	0.98411	0.069627	0.51893	0.008026	0.065494	not significant
WNT4	54361	0.0027577	0.9944	0.069603	0.46061	0.0015977	0.065455	not significant
ADIPOR2	79602	-0.15338	0.0020205	0.06959	0.5204	-0.121708	0.0654355	KO negative
GALNS	2588	0.062737	0.58619	0.069547	0.4646	0.0669585	0.0654135	not significant
ADD1	118	-0.010214	0.98176	0.069455	0.45611	-0.01014	0.0653467	not significant
OPN3	23596	0.040808	0.81477	0.069455	0.45299	0.044164	0.0653467	not significant
LONRF3	79836	0.064527	0.59035	0.069438	0.47737	0.068537	0.065309	not significant
ZNF664	144348	-0.01753	0.95418	0.069389	0.45299	-0.0183585	0.065272	not significant
DRAM1	55332	-0.0080261	0.98509	0.069371	0.46924	-0.00774555	0.06526	not significant
ABCC3	8714	-0.026602	0.92616	0.069348	0.49614	-0.0277935	0.065216	not significant
ATF7	11016	-0.024189	0.94191	0.069323	0.45299	-0.0252085	0.065194	not significant
MAF	4094	0.0013559	0.99533	0.069297	0.45287	0.00067795	0.065172	not significant
RAF1	5894	-0.41985	4.19e-14	0.069288	0.45611	-0.28254	0.0651675	KO negative
IL20RA	53832	-0.017859	0.96023	0.069277	0.66346	-0.0187015	0.0651575	not significant
TAS2R30	259293	-0.00037899	0.99726	0.069273	0.46423	-0.000189495	0.065152	not significant
PSTK	118672	0.12457	0.11267	0.069246	0.52135	0.12098	0.065135	not significant
PANK1	53354	0.037576	0.83623	0.069218	0.4913	0.040693	0.0651035	not significant
CNR2	1269	-0.009758	0.9802	0.06916	0.51498	-0.00951685	0.065068	not significant
EMILIN1	11117	-0.020259	0.95155	0.069132	0.47737	-0.0211295	0.065044	not significant
ZFP28	140612	0.038684	0.86107	0.06913	0.4646	0.041913	0.0649915	not significant
PSMB3	5691	0.077072	0.93831	0.069103	0.49891	0.0807485	0.064968	not significant
PPWD1	23398	-0.10506	0.78261	0.069096	0.50291	-0.0909515	0.0649545	not significant
ERI2	112479	0.0034732	0.99171	0.06908	0.46093	0.0024217	0.0649365	not significant
ARSB	411	0.012254	0.97454	0.06907	0.64221	0.011847	0.064929	not significant
TMEM255B	348013	-0.02429	0.93953	0.069064	0.45986	-0.0253015	0.06491	not significant
POFUT1	23509	0.0085899	0.98269	0.069051	0.46076	0.0080193	0.0648685	not significant
ART3	419	0.0055908	0.98619	0.069024	0.4646	0.0045838	0.064854	not significant
SPSB4	92369	0.05253	0.75881	0.069001	0.48512	0.056597	0.0648355	not significant
PPP1CB	5500	-0.18003	0.021877	0.068894	0.51466	-0.138358	0.0647805	KO negative
DEGS1	8560	-0.014129	0.97064	0.068866	0.51498	-0.0146605	0.064725	not significant
CD82	3732	-0.035169	0.8679	0.068853	0.45299	-0.035985	0.06471	not significant
SDF2	6388	0.0093892	0.98401	0.068803	0.52064	0.00881345	0.064679	not significant
CDC42BPB	9578	0.039801	0.83778	0.068748	0.45299	0.0431805	0.0646015	not significant
MAPK8	5599	-0.06415	0.58754	0.068699	0.4646	-0.0621475	0.0645625	not significant
VCAN	1462	-0.032087	0.9163	0.068684	0.50291	-0.032972	0.0645245	not significant
DHX35	60625	-0.43237	4.89e-14	0.068682	0.48473	-0.290375	0.0645075	KO negative
OR52I1	390037	-0.015729	0.96425	0.068647	0.43778	-0.0162575	0.0644595	not significant
FKTN	2218	0.033986	0.9026	0.068645	0.46259	0.0367885	0.0644435	not significant
EPO	2056	-0.018904	0.96923	0.068643	0.49431	-0.019774	0.0644285	not significant
GABARAP	11337	-0.0017754	0.99533	0.06864	0.48954	-0.00116921	0.0644135	not significant
STOM	2040	-0.011209	0.97454	0.068614	0.44354	-0.011312	0.0643895	not significant
PLEKHB2	55041	0.046251	0.74207	0.068599	0.45299	0.0497735	0.0643675	not significant
SLC25A44	9673	0.090669	0.31052	0.068577	0.45299	0.0928685	0.064342	not significant
OR5J2	282775	-0.0041085	0.98961	0.068574	0.46076	-0.0035516	0.064323	not significant
MOSPD2	158747	-0.062417	0.57304	0.068551	0.46342	-0.0604735	0.0643	not significant
PDZD2	23037	0.040762	0.81087	0.068526	0.68489	0.044107	0.064278	not significant
FUT7	2529	0.014708	0.97125	0.068522	0.5688	0.0147265	0.0642605	not significant
RAPGEF3	10411	0.026536	0.92616	0.068514	0.47381	0.028073	0.064248	not significant
CSF1	1435	0.023807	0.94191	0.068466	0.52449	0.025167	0.0641995	not significant
RTN4R	65078	0.081139	0.45097	0.068455	0.46051	0.0843455	0.0641845	not significant
KLHL26	55295	-0.00053799	0.9964	0.06837	0.45299	-0.000268995	0.0641385	not significant
PLCB4	5332	-0.012719	0.97454	0.068342	0.45155	-0.0131795	0.064113	not significant
PRKAA1	5562	-0.32733	3.95e-15	0.068309	0.54996	-0.228	0.0640895	KO negative
NLRP6	171389	-0.086785	0.39066	0.068285	0.59415	-0.079201	0.064069	not significant
SIGLEC7	27036	-0.0025545	0.99402	0.068281	0.51828	-0.00191055	0.064039	not significant
NFIB	4781	0.033504	0.86989	0.068242	0.46924	0.0363655	0.0639965	not significant
SEMA4A	64218	0.0088779	0.98455	0.06821	0.45666	0.00831	0.0639805	not significant
SFTPA1	653509	0.045617	0.78598	0.068199	0.54688	0.0492	0.0639745	not significant
TMCO2	127391	-0.0039233	0.98961	0.068184	0.48954	-0.0033085	0.063964	not significant
DCUN1D3	123879	-0.017725	0.95763	0.068182	0.46924	-0.0185445	0.063947	not significant
ATF6B	1388	0.055972	0.7445	0.068144	0.43772	0.0602775	0.0639195	not significant
CASP3	836	0.023401	0.94191	0.068137	0.68149	0.0247335	0.063916	not significant
CYP11B2	1585	-0.020803	0.94833	0.068066	0.45986	-0.021636	0.0638565	not significant
CYP27B1	1594	0.061239	0.71617	0.068062	0.47251	0.065347	0.0638425	not significant
CHST5	23563	0.071969	0.47993	0.068018	0.52098	0.0754525	0.063819	not significant
LRRC3	81543	-0.0091797	0.98438	0.068016	0.55406	-0.008928	0.0638055	not significant
CYP4V2	285440	-0.061512	0.63853	0.068013	0.4897	-0.059669	0.063803	not significant
CDC42EP3	10602	-0.0044589	0.98834	0.067965	0.55011	-0.00386275	0.063779	not significant
TMEM52	339456	-0.040434	0.84483	0.067939	0.45095	-0.040566	0.063764	not significant
YIPF4	84272	0.0063058	0.98619	0.067898	0.51466	0.00541175	0.063739	not significant
CABP2	51475	-0.038276	0.85363	0.067897	0.45611	-0.0387915	0.063736	not significant
ENPP3	5169	0.050963	0.75031	0.067872	0.4646	0.0549135	0.0637175	not significant
SLC25A10	1468	0.065196	0.67008	0.067871	0.5278	0.069481	0.0637015	not significant
PCDHGA10	56106	-0.0044208	0.98841	0.067808	0.46423	-0.0038409	0.063667	not significant
EPB42	2038	-0.069675	0.65934	0.067806	0.5886	-0.0665585	0.063663	not significant
C11orf54	28970	-0.0070827	0.98619	0.067777	0.54567	-0.0068292	0.0636325	not significant
GPX3	2878	0.078329	0.41856	0.067754	0.5144	0.081861	0.063599	not significant
SLCO6A1	133482	0.050487	0.77048	0.067748	0.52603	0.0544185	0.0635925	not significant
PRMT7	54496	-0.4655	7.78e-23	0.067737	0.47737	-0.311995	0.0635795	KO negative
RAX	30062	0.021007	0.95418	0.067708	0.5204	0.0217602	0.063554	not significant
SETD4	54093	0.015944	0.96446	0.067698	0.52098	0.016073	0.063543	not significant
ALG1	56052	-0.29701	0.0097644	0.067683	0.4646	-0.20931	0.063513	KO negative
CTPS2	56474	0.0013742	0.99533	0.067663	0.57213	0.0006871	0.0634995	not significant
HIBCH	26275	0.013317	0.97301	0.067644	0.47279	0.013165	0.063464	not significant
DCAF17	80067	0.013724	0.97169	0.067618	0.65129	0.0135745	0.0634475	not significant
MPV17L	255027	-0.0075723	0.98577	0.067611	0.57662	-0.00735015	0.0634395	not significant
LTB4R	1241	-0.015199	0.97454	0.067593	0.51893	-0.015696	0.0634255	not significant
OTUD3	23252	0.020816	0.94869	0.067571	0.4646	0.0215715	0.063379	not significant
NPPB	4879	0.036161	0.88728	0.06753	0.6229	0.039278	0.063333	not significant
OR11L1	391189	-0.026001	0.92725	0.067494	0.4699	-0.0271225	0.0632895	not significant
COCH	1690	0.038947	0.83576	0.067484	0.57403	0.042197	0.06328	not significant
SRCIN1	80725	0.022715	0.94421	0.067483	0.52508	0.0238452	0.0632575	not significant
TMEM45B	120224	-0.0016742	0.99533	0.067465	0.46076	-0.00104933	0.063243	not significant
KLKB1	3818	-0.02155	0.94602	0.067458	0.49431	-0.022463	0.063234	not significant
CAPN2	824	-0.072479	0.40568	0.067442	0.51367	-0.0688235	0.0632245	not significant
ASB6	140459	0.087218	0.2612	0.067365	0.46943	0.090003	0.0631795	not significant
NIPAL2	79815	-0.021215	0.94225	0.067363	0.52427	-0.0221655	0.063161	not significant
RAB24	53917	-0.042657	0.81982	0.067326	0.51893	-0.042562	0.0631262	not significant
AIFM2	84883	-0.021531	0.95178	0.067326	0.43743	-0.022449	0.0631262	not significant
LAIR2	3904	-0.043284	0.84308	0.067313	0.49931	-0.043168	0.0631045	not significant
DYTN	391475	0.052257	0.76892	0.067272	0.50251	0.056313	0.063062	not significant
PSMB4	5692	-0.17569	0.053965	0.067206	0.46201	-0.135793	0.0630205	not significant
TMEM232	642987	-0.03769	0.8679	0.067203	0.47401	-0.0383955	0.0630165	not significant
SEMA7A	8482	0.014137	0.96637	0.067191	0.54333	0.014028	0.0630065	not significant
DPP4	1803	0.027901	0.93831	0.067163	0.47737	0.0298565	0.06298	not significant
PAMR1	25891	0.008187	0.98577	0.06716	0.45967	0.0075285	0.06293	not significant
BRF2	55290	-0.19407	0.15629	0.067126	0.52508	-0.146667	0.0628945	not significant
TRIML1	339976	0.0038189	0.99013	0.067115	0.49419	0.0027612	0.062879	not significant
VAMP2	6844	-0.0015116	0.99533	0.067098	0.58332	-0.000825255	0.0628625	not significant
THSD4	79875	0.06511	0.58436	0.067097	0.5845	0.069318	0.0628515	not significant
CUZD1	50624	0.082165	0.34277	0.067067	0.5278	0.0853435	0.062834	not significant
CYP17A1	1586	-0.0029259	0.99319	0.067053	0.45155	-0.00228265	0.0628145	not significant
AICDA	57379	-0.0055767	0.98619	0.067032	0.51543	-0.0052046	0.0628035	not significant
ZNF726	730087	0.018705	0.95723	0.066978	0.4646	0.019134	0.0627765	not significant
CAMKV	79012	0.022548	0.94191	0.066963	0.50598	0.0236435	0.062765	not significant
GDPD1	284161	-0.0066388	0.98619	0.066954	0.51621	-0.00630705	0.0627585	not significant
METTL3	56339	-0.18421	0.033366	0.066919	0.54334	-0.140586	0.062715	KO negative
OPA1	4976	0.078711	0.51961	0.066906	0.52632	0.08233	0.0626765	not significant
VPS37C	55048	0.027934	0.91399	0.066905	0.5278	0.029902	0.062671	not significant
POLE4	56655	-0.082824	0.46328	0.066874	0.67784	-0.0762085	0.0626515	not significant
CLNS1A	1207	-0.25971	0.00036723	0.066869	0.47766	-0.18644	0.0626395	KO negative
UBE3D	90025	0.073562	0.41761	0.066858	0.49813	0.0770025	0.0626295	not significant
GSDMD	79792	-0.026134	0.93831	0.066842	0.60379	-0.027263	0.0625945	not significant
ZNF117	51351	-0.015594	0.96655	0.066818	0.46362	-0.016128	0.0625765	not significant
ZNF117	109504726	-0.015594	0.96655	0.066818	0.46362	-0.016128	0.0625765	not significant
LZTR1	8216	-0.15458	0.0026338	0.066795	0.4646	-0.122579	0.062542	KO negative
TMEM26	219623	0.047959	0.80197	0.066697	0.55588	0.0515323	0.062487	not significant
ARRDC4	91947	-0.0026153	0.99319	0.066675	0.52604	-0.0019735	0.062473	not significant
STK32C	282974	-0.035219	0.86607	0.066632	0.46259	-0.0360535	0.062448	not significant
HEXA	3073	-0.021686	0.94602	0.066629	0.53393	-0.0225855	0.06244	not significant
FRRS1L	23732	-0.022714	0.94191	0.066611	0.48512	-0.023646	0.0624205	not significant
MMP16	4325	0.00028099	0.99792	0.066599	0.53044	0.000140495	0.062368	not significant
ZNF257	113835	-0.0022516	0.99533	0.066598	0.48561	-0.0016126	0.0623525	not significant
LAX1	54900	0.039155	0.82678	0.066593	0.54068	0.0424135	0.0623255	not significant
ARL4D	379	-0.0048714	0.98644	0.066586	0.5142	-0.00431855	0.0623155	not significant
KAT2B	8850	0.040857	0.80716	0.066562	0.51444	0.0442105	0.0622975	not significant
CHRM1	1128	-0.0045438	0.98841	0.066558	0.4646	-0.0039441	0.0622905	not significant
ASNS	440	-0.033678	0.89565	0.066556	0.59358	-0.034572	0.0622835	not significant
FSTL4	23105	-0.018294	0.95723	0.066548	0.55423	-0.0191935	0.0622695	not significant
NIPA1	123606	0.053225	0.75399	0.066527	0.60148	0.0572895	0.062257	not significant
TTC8	123016	0.0056264	0.98619	0.066503	0.62695	0.00463885	0.0622235	not significant
RNF217	154214	0.0034423	0.99171	0.06648	0.5278	0.0023579	0.062195	not significant
LANCL1	10314	0.041447	0.80287	0.066465	0.46201	0.0448565	0.062176	not significant
YTHDC2	64848	0.054202	0.71927	0.066444	0.47294	0.058184	0.062139	not significant
GNPAT	8443	0.11662	0.029517	0.066435	0.54567	0.115125	0.062133	KO positive
RDH11	51109	0.02256	0.94191	0.066394	0.46259	0.0236705	0.06211	not significant
ABCD4	5826	-0.0052827	0.98703	0.066366	0.4646	-0.004919	0.0620815	not significant
RNMT	8731	-0.6303	7.93e-10	0.066336	0.49431	-0.41687	0.06206	KO negative
AQP2	359	-0.013602	0.97503	0.066317	0.48371	-0.0140735	0.0620425	not significant
SNX22	79856	0.015499	0.96637	0.066233	0.45739	0.015601	0.061997	not significant
C1S	716	0.03818	0.89371	0.066206	0.4583	0.041371	0.061978	not significant
PTPRT	11122	-0.013122	0.97454	0.066204	0.58618	-0.013522	0.061929	not significant
CCPG1	9236	-0.0022054	0.99533	0.066133	0.59415	-0.00155798	0.0618865	not significant
CPA6	57094	-0.0099348	0.98051	0.066127	0.50089	-0.0097647	0.061849	not significant
ABCA7	10347	-0.056828	0.74743	0.066099	0.57479	-0.0557505	0.0618195	not significant
AJAP1	55966	-0.02096	0.94421	0.066077	0.49444	-0.021825	0.061804	not significant
OR6B2	389090	-0.027819	0.91781	0.066074	0.46423	-0.02901	0.061789	not significant
B4GALNT4	338707	-0.047057	0.78303	0.06607	0.50019	-0.046862	0.0617725	not significant
PRSS22	64063	0.028867	0.92749	0.066016	0.48174	0.0309605	0.0617432	not significant
KLHL20	27252	-0.11566	0.049715	0.066016	0.49431	-0.0980215	0.0617432	KO negative
LIG4	3981	0.04489	0.78303	0.066004	0.46733	0.0485405	0.061736	not significant
ATP8B1	5205	-0.015908	0.96338	0.065961	0.49782	-0.0165435	0.0617115	not significant
PAFAH1B2	5049	-0.010188	0.97856	0.065942	0.61154	-0.0100955	0.061699	not significant
DGKK	139189	0.018144	0.95178	0.065916	0.54333	0.0185665	0.0616775	not significant
SCN8A	6334	0.039025	0.82575	0.065901	0.65312	0.0423118	0.061669	not significant
DHX34	9704	-0.25739	7.47e-10	0.065885	0.59358	-0.184835	0.0616515	KO negative
MATN3	4148	0.041604	0.80416	0.065878	0.48371	0.045095	0.0615998	not significant
FLRT1	23769	0.047799	0.79318	0.065878	0.45432	0.0513905	0.0615998	not significant
CGB8	94115	0	1	0.065856	0.61327	0	0.061569	not significant
HOXB8	3218	-0.092087	0.1831	0.06585	0.58201	-0.082572	0.0615385	not significant
RNF180	285671	-0.032726	0.88893	0.065826	0.50898	-0.0335895	0.0615255	not significant
NME4	4833	0.052966	0.74743	0.065821	0.71221	0.0570615	0.061506	not significant
TMBIM1	64114	0.030142	0.9212	0.065803	0.52508	0.032347	0.061497	not significant
MMP13	4322	0.05063	0.75542	0.065791	0.49282	0.05459	0.061484	not significant
DEFB116	245930	-0.0065836	0.98619	0.065714	0.50665	-0.00623555	0.061412	not significant
CLDN8	9073	0.0058362	0.98619	0.06571	0.46173	0.00488145	0.0614095	not significant
MEOX2	4223	0.067918	0.45981	0.065706	0.45611	0.072046	0.061383	not significant
OR5A1	219982	0.082054	0.3624	0.065687	0.47737	0.085145	0.061369	not significant
TNFRSF10D	8793	0.014248	0.97301	0.065642	0.50601	0.0141405	0.061321	not significant
GK	2710	0.052398	0.773	0.065633	0.59358	0.0564285	0.0612935	not significant
CYP1A2	1544	0.057051	0.66781	0.06561	0.46349	0.061369	0.061265	not significant
SLC38A7	55238	0.069141	0.56475	0.065567	0.52427	0.0729925	0.0612395	not significant
RPAP2	79871	0.027212	0.94442	0.065519	0.4897	0.029033	0.0611715	not significant
ZFP64	55734	-0.091943	0.31145	0.065507	0.48493	-0.0824805	0.061164	not significant
GNPTG	84572	0.030987	0.93098	0.065507	0.62761	0.03342	0.061164	not significant
MNAT1	4331	-0.42448	5.53e-12	0.065442	0.5278	-0.285055	0.0611005	KO negative
BPIFB6	128859	-0.019446	0.96222	0.065439	0.56171	-0.020347	0.061088	not significant
KLHL42	57542	0.087519	0.28763	0.065423	0.55776	0.090221	0.0610755	not significant
ITPKC	80271	-0.029201	0.92463	0.065412	0.51738	-0.0302915	0.0610685	not significant
RNF2	6045	-0.06362	0.56605	0.065375	0.5886	-0.061734	0.06103	not significant
HIP1	3092	0.016347	0.962	0.06533	0.49431	0.016551	0.060985	not significant
CHST12	55501	0.051284	0.73171	0.0653	0.4657	0.0553215	0.060963	not significant
FAM168B	130074	0.01988	0.95771	0.065297	0.65139	0.020426	0.060956	not significant
KCNQ1	3784	-0.077713	0.46368	0.065278	0.51444	-0.0726005	0.060943	not significant
MEF2D	4209	4.92e-05	0.99973	0.06526	0.52093	2.46e-05	0.060921	not significant
VPS26A	9559	-0.0018631	0.99533	0.065242	0.59358	-0.00127086	0.060898	not significant
FAM172A	83989	-0.1093	0.056875	0.065184	0.52427	-0.0936345	0.060865	not significant
GALNT5	11227	0.099601	0.10889	0.06511	0.49891	0.100106	0.0608195	not significant
SOX14	8403	-0.0025164	0.99495	0.065097	0.55464	-0.00187965	0.060791	not significant
TIMP2	7077	0.036704	0.89667	0.06509	0.50226	0.039789	0.060786	not significant
ZNF12	7559	0.05578	0.62638	0.065084	0.52508	0.0600295	0.060754	not significant
ZNRF1	84937	0.0045793	0.98841	0.06508	0.51828	0.003492	0.060746	not significant
C14orf93	60686	-0.0071432	0.98619	0.06507	0.59415	-0.00696465	0.0607	not significant
BST1	683	-0.039476	0.83576	0.064999	0.55776	-0.039705	0.0606265	not significant
BATF3	55509	0.041895	0.82353	0.06497	0.51444	0.0455175	0.0606095	not significant
SETD2	29072	-0.55777	3.25e-39	0.064966	0.47737	-0.36757	0.060606	KO negative
TMEM39A	55254	0.0084228	0.98269	0.064934	0.52064	0.00779315	0.0605705	not significant
GSS	2937	-0.071002	0.62084	0.064877	0.51864	-0.0676033	0.06054	not significant
KLK5	25818	0.018952	0.95495	0.064856	0.60283	0.0194235	0.0605	not significant
ACKR2	1238	0.148	0.010108	0.064807	0.48512	0.13745	0.0604735	KO positive
GPR20	2843	-0.037892	0.87268	0.064785	0.50268	-0.038527	0.0604585	not significant
FXYD7	53822	0.015751	0.96923	0.064779	0.58226	0.01589	0.0604525	not significant
CD80	941	-0.0034449	0.99064	0.064762	0.52093	-0.0027538	0.0604355	not significant
ABCB4	5244	0.037271	0.85884	0.064761	0.57216	0.0404235	0.060431	not significant
EME2	197342	-0.038493	0.85524	0.064755	0.54295	-0.0390855	0.060409	not significant
KLK11	11012	0.072064	0.56701	0.064714	0.55617	0.0755145	0.0603805	not significant
DCLK1	9201	0.053627	0.73536	0.064695	0.58476	0.05766	0.0603455	not significant
TSPAN2	10100	0.063096	0.5683	0.064592	0.54996	0.0672395	0.0602925	not significant
MAP7	9053	-0.001433	0.99533	0.064583	0.54333	-0.00073616	0.0602775	not significant
NDST3	9348	0.021329	0.94869	0.064561	0.51498	0.0222215	0.0602655	not significant
CTDNEP1	23399	0.10852	0.14942	0.064525	0.53592	0.1076	0.060246	not significant
IGHMBP2	3508	-0.024533	0.94191	0.064513	0.58512	-0.025537	0.0602395	not significant
LOX	4015	-0.016207	0.97071	0.064508	0.58332	-0.0168885	0.0601955	not significant
EHD2	30846	0.024395	0.94063	0.064481	0.49419	0.025689	0.0601805	not significant
SLC25A30	253512	0.0076627	0.98555	0.064444	0.51444	0.00700465	0.0601615	not significant
SLC17A8	246213	0.016121	0.9602	0.064422	0.53396	0.0162735	0.060148	not significant
SH2D5	400745	-0.0070229	0.98619	0.06442	0.52427	-0.0067704	0.0601455	not significant
APOD	347	-0.024366	0.92616	0.064324	0.55727	-0.0253875	0.0600845	not significant
IFIH1	64135	0.058271	0.62638	0.064321	0.51873	0.062473	0.060081	not significant
SLC7A2	6542	0.0059605	0.98619	0.064288	0.59358	0.0050286	0.0600355	not significant
FAH	2184	0.060107	0.62728	0.064279	0.47569	0.064342	0.0600295	not significant
USP34	9736	-0.071866	0.47583	0.06427	0.49813	-0.068401	0.0600125	not significant
NAA20	51126	-0.14344	0.48587	0.06424	0.62294	-0.115542	0.059981	not significant
TRMT2B	79979	0.078528	0.33764	0.064221	0.50494	0.082045	0.059962	not significant
PPP2CB	5516	0.056246	0.65449	0.064213	0.54736	0.060606	0.059947	not significant
LHX9	56956	-0.024448	0.9354	0.064187	0.51556	-0.025474	0.059931	not significant
GSK3B	2932	-0.044526	0.79073	0.064185	0.54736	-0.0445535	0.0599295	not significant
SLC7A7	9056	-0.017548	0.95852	0.064119	0.51498	-0.0183685	0.0598653	not significant
GALM	130589	0.00030307	0.99792	0.064119	0.53793	0.000151535	0.0598653	not significant
GNPTAB	79158	0.055375	0.69584	0.064109	0.58628	0.0595395	0.0598385	not significant
SLC35G2	80723	0.0054884	0.98619	0.064098	0.47804	0.00447645	0.0598305	not significant
DUSP7	1849	0.077613	0.27956	0.06409	0.53488	0.0812	0.0598255	not significant
DENND1A	57706	0.011156	0.97454	0.064084	0.66925	0.0107315	0.0598135	not significant
ASIC1	41	0.013428	0.97454	0.064037	0.59586	0.013285	0.0597835	not significant
VCAM1	7412	-0.03507	0.86421	0.064026	0.466	-0.0358825	0.059747	not significant
ATP8B4	79895	0.038866	0.82587	0.063993	0.46782	0.0421065	0.05973	not significant
NOXRED1	122945	-0.038803	0.83487	0.063886	0.5204	-0.0392775	0.0596735	not significant
ACVR1B	91	-0.0077396	0.98517	0.063803	0.5278	-0.0074989	0.0596025	not significant
FBXO17	115290	0.04014	0.87152	0.063755	0.49931	0.043497	0.059578	not significant
BLOC1S6	26258	0.0096065	0.98176	0.063721	0.60209	0.0090547	0.059559	not significant
SLC25A40	55972	-0.016949	0.95897	0.063704	0.57282	-0.0177395	0.0595395	not significant
HS6ST3	266722	0.051915	0.73434	0.063676	0.50203	0.0560005	0.0595035	not significant
PIGQ	9091	-0.041747	0.82858	0.063664	0.49461	-0.0418145	0.0594935	not significant
ST14	6768	0.0047851	0.98919	0.063617	0.48596	0.0037171	0.0594305	not significant
PYGO1	26108	-0.0036702	0.98961	0.063604	0.64575	-0.00302815	0.0594165	not significant
DCLRE1C	64421	-0.0041313	0.98895	0.063568	0.55599	-0.00357135	0.0593905	not significant
SETD1B	23067	0.099969	0.20123	0.063527	0.60293	0.100309	0.0593635	not significant
PRKCI	5584	0.030983	0.89797	0.063486	0.51828	0.033402	0.0593425	not significant
RAB28	9364	-0.043452	0.78261	0.06347	0.52427	-0.0433755	0.059328	not significant
TXNDC16	57544	0.03832	0.85824	0.063458	0.51466	0.0415075	0.059313	not significant
SUN3	256979	0.039529	0.81113	0.063454	0.56663	0.0428665	0.0593085	not significant
PTH1R	5745	0.020454	0.95645	0.063433	0.54749	0.0210735	0.059291	not significant
NUP93	9688	-0.41086	0.00024592	0.063424	0.52064	-0.27644	0.059284	KO negative
MELK	9833	0.0049537	0.98731	0.063365	0.57639	0.00390155	0.0592495	not significant
PAFAH1B1	5048	0.14592	0.52606	0.063358	0.70439	0.13612	0.059239	not significant
PSMB10	5699	-0.060092	0.58946	0.063357	0.47984	-0.05851	0.0592325	not significant
GRASP		0.051325	0.75542	0.063349	0.54567	0.055379	0.05922	not significant
FLRT2	23768	0.00468	0.98703	0.063345	0.52508	0.0036383	0.0591915	not significant
OR5M1	390168	0.075676	0.47013	0.063291	0.49298	0.07918	0.0591615	not significant
CDH13	1012	0.016548	0.96023	0.063247	0.52206	0.0167735	0.0591305	not significant
CEACAM7	1087	-0.0088672	0.98401	0.063224	0.50235	-0.00859075	0.0591085	not significant
RAB7A	7879	-0.38365	1.46e-11	0.063222	0.51611	-0.26157	0.059102	KO negative
WNK2	65268	-0.040508	0.84428	0.063221	0.5886	-0.0406345	0.059101	not significant
NADK	65220	0.020095	0.96484	0.063206	0.58247	0.020702	0.059087	not significant
RAB8B	51762	0.0412	0.81566	0.063135	0.65129	0.0445495	0.0590305	not significant
NRL	4901	-0.01846	0.95828	0.063109	0.50715	-0.0193205	0.0590175	not significant
P2RY2	5029	0.0087879	0.98551	0.06309	0.59233	0.00822405	0.0590045	not significant
PARK7	11315	0.0092359	0.98119	0.063076	0.55732	0.00863005	0.058985	not significant
MCM4	4173	-0.020117	0.9722	0.063019	0.64714	-0.0210315	0.058946	not significant
LAP3	51056	-0.05058	0.6878	0.062985	0.64027	-0.050126	0.058909	not significant
KIAA1024		0.028051	0.90478	0.062871	0.54736	0.0300565	0.058839	not significant
IFITM5	387733	-0.043103	0.81711	0.062818	0.58329	-0.0429895	0.0588085	not significant
XYLT2	64132	0.0015297	0.99533	0.062814	0.58696	0.00076485	0.058798	not significant
GLIPR2	152007	0.0098582	0.98051	0.062804	0.58628	0.0092986	0.058777	not significant
SLC18A3	6572	0.003956	0.98961	0.062794	0.59415	0.0029026	0.058761	not significant
ALOX12	239	0.046171	0.83185	0.062745	0.49614	0.0497088	0.0587345	not significant
PRRG3	79057	0.040025	0.81138	0.062719	0.59467	0.0433595	0.0587135	not significant
CHPF2	54480	0.034146	0.8788	0.062714	0.63346	0.03695	0.0587105	not significant
IL1RAP	3556	-0.010966	0.9787	0.062663	0.61778	-0.011033	0.0586765	not significant
JDP2	122953	-0.03303	0.89389	0.062638	0.52661	-0.0338945	0.058607	not significant
SOD3	6649	0.0043845	0.98961	0.062629	0.54334	0.0033087	0.058599	not significant
ANKFY1	51479	-0.043841	0.79318	0.062611	0.5278	-0.043796	0.05858	not significant
CCL26	10344	0.067426	0.61053	0.062606	0.59358	0.071685	0.0585585	not significant
KCNK16	83795	0.025689	0.93687	0.062586	0.52427	0.027069	0.0584905	not significant
GSTM2	2946	0.014612	0.96637	0.062578	0.61138	0.0146115	0.058463	not significant
TRIM28	10155	-0.51857	1.13e-17	0.062566	0.6575	-0.346045	0.058452	KO negative
DARS2	55157	-0.1264	0.076564	0.062464	0.55776	-0.104496	0.0584	not significant
MCM9	254394	-0.013963	0.96787	0.06242	0.50628	-0.0144425	0.0583655	not significant
STEAP1	26872	0.0058712	0.98619	0.06241	0.57662	0.0049353	0.0583525	not significant
EPHA10	284656	-0.018699	0.95982	0.062397	0.52336	-0.0195535	0.058344	not significant
NEIL1	79661	-0.0097668	0.98087	0.062347	0.59914	-0.009526	0.058317	not significant
UGGT1	56886	-0.2684	1.37e-09	0.062315	0.52992	-0.19222	0.058278	KO negative
TSSK6	83983	0.077141	0.38536	0.062282	0.49686	0.08081	0.058244	not significant
ZNF382	84911	0.010136	0.97995	0.062258	0.59586	0.00958925	0.058231	not significant
PLOD3	8985	0.05385	0.69039	0.062166	0.59493	0.057889	0.058184	not significant
TNK2	10188	0.006307	0.98619	0.062145	0.54996	0.00542015	0.0581705	not significant
TBC1D5	9779	0.096518	0.14651	0.062131	0.58332	0.098047	0.0581615	not significant
ACSF3	197322	-0.044972	0.77818	0.062128	0.61503	-0.045048	0.0581355	not significant
CXCL17	284340	-0.010849	0.9802	0.062115	0.59358	-0.01086	0.058122	not significant
CSMD2	114784	0.01214	0.97454	0.062105	0.57319	0.0117145	0.0580935	not significant
GFM2	84340	-0.10612	0.093025	0.062098	0.48598	-0.0916685	0.0580855	not significant
PDE1C	5137	0.038982	0.81516	0.062092	0.57132	0.042216	0.0580775	not significant
CD300C	10871	0.015645	0.97169	0.062088	0.51498	0.0157685	0.058049	not significant
OR1D2	4991	0.032889	0.88482	0.062083	0.52427	0.0356055	0.058034	not significant
ASGR1	432	-0.013997	0.97311	0.062071	0.53687	-0.0144925	0.0580245	not significant
SLC28A3	64078	0.00052483	0.99628	0.062034	0.54358	0.000262415	0.057998	not significant
MMP21	118856	0.044587	0.81068	0.062032	0.54504	0.048158	0.057986	not significant
CPT1B	1375	-0.027218	0.91857	0.062024	0.5362	-0.02846	0.0579765	not significant
SLC35B2	347734	0.17573	0.00022759	0.062011	0.52064	0.15547	0.057967	KO positive
USP11	8237	0.009763	0.9804	0.062001	0.59432	0.00919565	0.057957	not significant
PIK3CB	5291	0.019913	0.94602	0.061985	0.53396	0.020485	0.0579445	not significant
PCBD2	84105	0.048062	0.75232	0.061958	0.52206	0.051657	0.0579285	not significant
CCL27	10850	0.044664	0.84411	0.061952	0.53729	0.0483165	0.057916	not significant
CCR5	1234	0.11422	0.057623	0.061928	0.50037	0.11287	0.057889	not significant
KLHL5	51088	-0.035163	0.8983	0.061909	0.51811	-0.035976	0.0578735	not significant
SUPT20H	55578	-0.39991	1.82e-18	0.061843	0.6125	-0.270545	0.057827	KO negative
SPACA3	124912	-0.031493	0.90309	0.061843	0.56663	-0.032531	0.057827	not significant
TCEA2	6919	0.01788	0.9579	0.061841	0.5661	0.0182545	0.05781	not significant
SETD1A	9739	-0.49387	3.28e-06	0.061838	0.52292	-0.33008	0.0578055	KO negative
CDHR5	53841	-0.058623	0.73441	0.061825	0.57132	-0.0572865	0.0577725	not significant
SEPHS2	22928	0.2703	0.00024394	0.061824	0.58332	0.216755	0.057769	KO positive
AMPD2	271	-0.033752	0.90448	0.061787	0.57474	-0.034662	0.057746	not significant
CA2	760	-0.01354	0.97137	0.061784	0.52206	-0.0139775	0.057738	not significant
TALDO1	6888	-0.055722	0.73536	0.061735	0.54068	-0.054776	0.0577135	not significant
CD28	940	0.066569	0.51547	0.061705	0.59415	0.0709445	0.057698	not significant
GANC	2595	0.018222	0.95422	0.061693	0.54358	0.018652	0.0576692	not significant
FAHD2B	151313	-0.0019194	0.99533	0.061693	0.59358	-0.0013212	0.0576692	not significant
RARS		-0.021369	0.97301	0.061691	0.5278	-0.0222875	0.0576565	not significant
FBXL4	26235	-0.037058	0.91857	0.061674	0.62126	-0.0377775	0.0576435	not significant
NSUN3	63899	0.05987	0.6145	0.061633	0.59415	0.0640895	0.057613	not significant
TMEM200C	645369	-0.035141	0.86043	0.061602	0.5278	-0.035935	0.0575935	not significant
STK17B	9262	0.023108	0.94191	0.061533	0.52508	0.024328	0.057544	not significant
TYROBP	7305	0.016754	0.95944	0.061518	0.51873	0.0169785	0.057492	not significant
PM20D1	148811	0.031772	0.88887	0.061505	0.48931	0.034308	0.0574518	not significant
ZBTB8A	653121	0.0091137	0.98269	0.061505	0.53253	0.00847745	0.0574518	not significant
ZNF81	347344	0.014247	0.96883	0.061501	0.56399	0.014129	0.057447	not significant
FAAH	2166	0.01584	0.962	0.061478	0.58512	0.0159805	0.0574345	not significant
TOP3B	8940	-0.0028359	0.99495	0.061467	0.55436	-0.0021852	0.057422	not significant
YBEY	54059	-0.035659	0.86608	0.061455	0.69397	-0.0365645	0.057415	not significant
DDX47	51202	0.036151	0.95155	0.061429	0.52427	0.0392715	0.0574	not significant
MDGA2	161357	-0.017207	0.96338	0.061425	0.52574	-0.0180555	0.057386	not significant
RETSAT	54884	0.010268	0.98051	0.061399	0.57662	0.00983515	0.0573585	not significant
WDR24	84219	0.28623	3.59e-11	0.06139	0.52427	0.231555	0.057329	KO positive
GPR84	53831	0.01556	0.97064	0.061367	0.5278	0.0156465	0.0573085	not significant
UPP2	151531	0.023707	0.93687	0.061362	0.5278	0.0250515	0.057302	not significant
SLC34A3	142680	-0.0090818	0.98269	0.061354	0.56594	-0.00883545	0.0572895	not significant
RPS6KL1	83694	0.035143	0.87924	0.061348	0.54567	0.0380195	0.0572705	not significant
RPP40	10799	0.11512	0.37015	0.061317	0.51444	0.11388	0.0572375	not significant
KLHL35	283212	0.011062	0.9775	0.061277	0.58919	0.0106175	0.057214	not significant
FBXL5	26234	0.0088504	0.98269	0.061259	0.69747	0.0082791	0.0571835	not significant
SCGB3A2	117156	0.039509	0.85333	0.061248	0.59586	0.0428305	0.057171	not significant
CDIP1	29965	0.017697	0.95945	0.061207	0.50628	0.017958	0.0571285	not significant
IL23A	51561	0.04729	0.76424	0.061204	0.52135	0.050886	0.0571	not significant
CLEC4F	165530	0.066745	0.47711	0.061194	0.52427	0.0711435	0.057092	not significant
UNC93A	54346	0.0093386	0.98269	0.061164	0.52027	0.008752	0.057073	not significant
MCOLN2	255231	0.035504	0.86963	0.061157	0.62226	0.038596	0.0570615	not significant
RXRG	6258	0.01005	0.97995	0.061136	0.59415	0.00948645	0.057036	not significant
MAN2C1	4123	0.072506	0.47405	0.061082	0.57403	0.075885	0.0570065	not significant
STEAP3	55240	0.019021	0.96023	0.061062	0.59526	0.019507	0.0569935	not significant
EMB	133418	-0.017062	0.96484	0.061036	0.54567	-0.0178845	0.0569725	not significant
POP5	51367	0.010362	0.98921	0.061019	0.61365	0.0099375	0.056958	not significant
IRAK4	51135	-0.03937	0.89689	0.061002	0.5204	-0.03963	0.056935	not significant
MUC3A	4584	0.038624	0.86455	0.060995	0.52292	0.0418505	0.05693	not significant
POLE2	5427	-0.067844	0.83487	0.06099	0.65818	-0.065215	0.0569155	not significant
ALKBH3	221120	-0.0285	0.9163	0.060989	0.59467	-0.0295955	0.056912	not significant
AGBL2	79841	0.011155	0.9804	0.060975	0.52878	0.0107215	0.056892	not significant
IL1F10	84639	-0.0020158	0.99533	0.06096	0.52177	-0.00141662	0.0568825	not significant
SMIM7	79086	0.023221	0.94057	0.060875	0.51444	0.0245085	0.0568365	not significant
ADRB3	155	0.050806	0.73536	0.060855	0.58618	0.0547625	0.056818	not significant
CACNA2D4	93589	0.0040621	0.98921	0.06084	0.48424	0.00299365	0.0567915	not significant
BACH1	571	-0.054079	0.70948	0.060836	0.6644	-0.0531945	0.056775	not significant
BACH1	100379661	-0.054079	0.70948	0.060836	0.6644	-0.0531945	0.056775	not significant
ATP2B3	492	0.01734	0.95846	0.060782	0.52661	0.0175875	0.0567335	not significant
OR6P1	128366	0.0029735	0.99269	0.060756	0.53521	0.00180575	0.0567065	not significant
HSF4	3299	0.034463	0.88728	0.060745	0.58332	0.0372435	0.056689	not significant
CD34	947	0.01179	0.97454	0.060732	0.55011	0.0113605	0.056678	not significant
LRP4	4038	-0.039793	0.83576	0.06072	0.50805	-0.0400275	0.0566605	not significant
IGFLR1	79713	-0.02124	0.94337	0.060711	0.59415	-0.0221965	0.056637	not significant
CES2	8824	-0.012753	0.97529	0.060709	0.60293	-0.0132185	0.056634	not significant
TMEM182	130827	0.037706	0.86325	0.060694	0.57595	0.040798	0.056624	not significant
PBX2	5089	-0.044427	0.78292	0.060693	0.58016	-0.04444	0.0566155	not significant
LRRC55	219527	-0.015247	0.96968	0.060664	0.58332	-0.015732	0.056597	not significant
CXCL12	6387	0.015397	0.96446	0.060635	0.62126	0.015497	0.056579	not significant
CDH7	1005	-0.033075	0.8679	0.060617	0.58628	-0.033934	0.0565495	not significant
TKTL1	8277	-0.015412	0.96282	0.060609	0.54208	-0.0159505	0.0565355	not significant
OVOL3	728361	-0.001696	0.99533	0.060608	0.52427	-0.00110552	0.0565305	not significant
TTLL4	9654	-0.061535	0.5579	0.060561	0.53523	-0.0597325	0.056497	not significant
HMOX1	3162	-0.047565	0.75881	0.06053	0.57282	-0.047273	0.0564725	not significant
TRIM67	440730	-0.023924	0.94057	0.060519	0.67139	-0.024868	0.0564665	not significant
ATP6V0A2	23545	-0.11127	0.050027	0.060508	0.59189	-0.095111	0.056459	not significant
TMEM191C	645426	-0.018809	0.95771	0.060477	0.59257	-0.019638	0.056439	not significant
HOXB6	3216	-0.011526	0.97995	0.06046	0.50789	-0.0117415	0.056429	not significant
TBX20	57057	0.078243	0.39066	0.060458	0.59415	0.0817735	0.056428	not significant
PPP3R1	5534	0.08455	0.22983	0.060403	0.63346	0.0874975	0.056383	not significant
GRIK4	2900	-0.0085252	0.98401	0.060398	0.63148	-0.0081996	0.0563495	not significant
TNXB	7148	0.021226	0.95418	0.060386	0.59415	0.02205	0.056338	not significant
VAMP8	8673	-0.021178	0.94191	0.060369	0.51828	-0.022137	0.056313	not significant
LMBRD2	92255	-0.0021787	0.99533	0.060367	0.52093	-0.00154418	0.05631	not significant
TRAF2	7186	-0.60284	6.48e-27	0.060363	0.53253	-0.396575	0.0562865	KO negative
PBRM1	55193	0.11832	0.040081	0.060357	0.59233	0.116455	0.056276	KO positive
CDKL5	6792	0.033652	0.87129	0.060339	0.57662	0.036488	0.0562625	not significant
GNAQ	2776	-0.00075794	0.99542	0.06031	0.60684	-0.00037897	0.0562475	not significant
PDZK1IP1	10158	0.0054691	0.98619	0.060303	0.51828	0.0044556	0.0562345	not significant
SLC25A22	79751	0.096374	0.10676	0.060281	0.53793	0.0979705	0.0562	not significant
DBNL	28988	-0.036394	0.87447	0.060247	0.59415	-0.03724	0.056182	not significant
FBXW2	26190	0.021931	0.95178	0.060242	0.60057	0.0229127	0.0561585	not significant
PLA2G2A	5320	-0.019115	0.95418	0.060238	0.55873	-0.019992	0.0561535	not significant
ALDH3B2	222	0.024303	0.93687	0.060214	0.54567	0.0256175	0.056136	not significant
GZMB	3002	0.10659	0.53475	0.060203	0.5466	0.10596	0.056107	not significant
GKN2	200504	-0.031429	0.91182	0.060196	0.62839	-0.032455	0.0561025	not significant
NAGPA	51172	0.080499	0.42885	0.060194	0.65101	0.0839415	0.0561015	not significant
OR2A25	392138	-0.07888	0.32364	0.060186	0.51873	-0.0736995	0.0560945	not significant
NAV2	89797	-0.0019463	0.99533	0.060177	0.53573	-0.00133826	0.056086	not significant
TAS1R1	80835	-0.016579	0.96282	0.06016	0.6074	-0.017351	0.056067	not significant
NRG3	10718	-0.0091987	0.98051	0.060158	0.59415	-0.00893945	0.056061	not significant
TGOLN2	10618	-0.022842	0.9534	0.060152	0.54996	-0.0237438	0.056052	not significant
FIGNL1	63979	-0.040749	0.85456	0.060114	0.61687	-0.040853	0.05603	not significant
IRAK3	11213	0.012312	0.97454	0.06011	0.54358	0.011922	0.0560195	not significant
RNF5	6048	-0.021172	0.94869	0.060097	0.57282	-0.0221285	0.056013	not significant
PRDX1	5052	0.34459	2.95e-16	0.060086	0.65379	0.276275	0.0560005	KO positive
POLD1	5424	-0.61105	0.019456	0.060085	0.63346	-0.40121	0.0559765	KO negative
MUC1	4582	-0.034701	0.92091	0.06008	0.5338	-0.0356285	0.0559735	not significant
PYGB	5834	-0.031158	0.91348	0.060076	0.60057	-0.0322075	0.0559427	not significant
ZNF729	100287226	0.029285	0.90345	0.060076	0.54504	0.031476	0.0559427	not significant
GRB14	2888	0.0039923	0.98921	0.060044	0.61929	0.0029396	0.0558955	not significant
IL7R	3575	0.013989	0.96637	0.060025	0.59493	0.0138365	0.055884	not significant
CD33	945	-0.0039653	0.98921	0.05999	0.52206	-0.00337275	0.055862	not significant
POLR2B	5431	-0.030163	0.97424	0.059917	0.60057	-0.0313255	0.0557855	not significant
ADAMTS4	9507	0.0035674	0.99171	0.05989	0.52043	0.00252095	0.0557565	not significant
TIGIT	201633	-0.022535	0.94191	0.059817	0.54619	-0.0234623	0.055694	not significant
FNDC7	163479	0.0065577	0.98619	0.059803	0.59358	0.00571095	0.055664	not significant
MTMR14	64419	0.082933	0.31118	0.059652	0.60379	0.0859465	0.0555805	not significant
GPR61	83873	0.0030336	0.99338	0.059642	0.53887	0.00185181	0.0555435	not significant
FBXO5	26271	-0.021118	0.9722	0.059623	0.56299	-0.022071	0.055532	not significant
CTNNA2	1496	-0.057272	0.63797	0.059601	0.58094	-0.0561115	0.05552	not significant
SLC7A5	8140	-0.23167	2.24e-07	0.059566	0.56418	-0.16966	0.0554825	KO negative
CACNA2D2	9254	0.097686	0.22312	0.05955	0.60514	0.098928	0.0554715	not significant
EIF2S3	1968	-0.036966	0.98401	0.059523	0.67138	-0.0376705	0.0554495	not significant
B4GALT2	8704	0.068629	0.587	0.059495	0.5579	0.072505	0.055434	not significant
IDNK	414328	0.02021	0.94869	0.059491	0.69025	0.020808	0.0554265	not significant
CARS		0.015844	0.9804	0.059474	0.59415	0.0159995	0.055416	not significant
PCGF5	84333	-0.0088015	0.98619	0.059468	0.52632	-0.00854565	0.0554045	not significant
ARF6	382	-0.015276	0.96923	0.059463	0.58512	-0.0158135	0.0553995	not significant
SLC24A1	9187	-0.0067028	0.98619	0.059433	0.66081	-0.00635905	0.055379	not significant
PUS3	83480	0.18504	0.00019667	0.059429	0.53555	0.161305	0.055375	KO positive
CPEB1	64506	0.02641	0.92616	0.059419	0.54334	0.027894	0.055368	not significant
RGS7	6000	-0.038188	0.82587	0.05941	0.60057	-0.0387265	0.0553605	not significant
IKBKB	3551	-0.069827	0.44394	0.059359	0.7245	-0.0666875	0.0553215	not significant
DNMT3L	29947	0.0091936	0.98401	0.059337	0.58681	0.00854505	0.05531	not significant
PRDM14	63978	-0.061045	0.559	0.05932	0.59415	-0.0593175	0.0552695	not significant
XPR1	9213	0.024778	0.93426	0.059297	0.54295	0.0261235	0.055243	not significant
UFSP1	402682	-0.0098606	0.98401	0.059292	0.57662	-0.0096675	0.0552365	not significant
TK1	7083	0.0073241	0.98619	0.059269	0.58681	0.00665045	0.055218	not significant
TMEM215	401498	0.026118	0.91857	0.059125	0.60148	0.0275835	0.0551405	not significant
KAZALD1	81621	0.001342	0.99533	0.059101	0.52878	0.000671	0.055115	not significant
HSD3B1	3283	-0.045323	0.81113	0.059087	0.59415	-0.045261	0.0550965	not significant
PSEN2	5664	-0.073844	0.55329	0.059084	0.56469	-0.06989	0.0550915	not significant
TMEM165	55858	0.11306	0.11495	0.059045	0.59415	0.111825	0.055065	not significant
TRIL	9865	0.10029	0.16202	0.058991	0.61293	0.100505	0.055037	not significant
ANKAR	150709	0.019203	0.95032	0.058985	0.58476	0.019679	0.055025	not significant
RNF157	114804	-0.017759	0.97301	0.058945	0.64027	-0.018597	0.0549905	not significant
IL10RA	3587	0.03631	0.85483	0.058938	0.61687	0.039398	0.0549815	not significant
MDH1B	130752	-0.013524	0.97071	0.058898	0.57282	-0.013969	0.054959	not significant
SNAI3	333929	0.07025	0.66095	0.058897	0.55617	0.073997	0.0549435	not significant
CCR10	2826	-0.026547	0.9436	0.05888	0.54492	-0.0277365	0.0549235	not significant
AGTR1	185	0.043281	0.81975	0.058864	0.58226	0.046934	0.0549135	not significant
OR14J1	442191	-0.038713	0.83576	0.058849	0.64988	-0.039211	0.0548915	not significant
KCTD9	54793	0.042119	0.80716	0.058835	0.58628	0.045743	0.054869	not significant
TSSK3	81629	0.043169	0.82904	0.058784	0.65837	0.0468285	0.05483	not significant
LMNB1	4001	-0.016643	0.96023	0.058783	0.59072	-0.0174455	0.0548295	not significant
SDC4	6385	-0.01724	0.96023	0.058756	0.60283	-0.0180865	0.054815	not significant
NENF	29937	-0.013629	0.96955	0.05873	0.54567	-0.014149	0.054797	not significant
STX1B	112755	-0.0042403	0.98882	0.058725	0.56198	-0.0036732	0.0547825	not significant
LIPI	149998	0.058429	0.60189	0.058719	0.52878	0.0626515	0.0547625	not significant
FKBP9	11328	0.069498	0.65449	0.058706	0.61388	0.0732855	0.054753	not significant
PARN	5073	0.11745	0.1005	0.058689	0.62886	0.11576	0.0547195	not significant
CES3	23491	0.0045179	0.98841	0.058673	0.5715	0.00343235	0.05469	not significant
GP6	51206	0.033114	0.89123	0.058671	0.63452	0.0359565	0.054688	not significant
PIK3C2A	5286	0.0071528	0.98619	0.05865	0.57049	0.00643335	0.054665	not significant
FLT3LG	2323	0.059444	0.82809	0.05855	0.58512	0.063599	0.05459	not significant
SC5D	6309	0.015224	0.96446	0.058516	0.65061	0.0153225	0.0545715	not significant
R3HDML	140902	0.020769	0.94869	0.058504	0.57079	0.021513	0.054565	not significant
TSEN34	79042	-0.043858	0.85414	0.05848	0.59415	-0.0438445	0.054541	not significant
NOV		-0.02891	0.91272	0.058454	0.69297	-0.029941	0.054494	not significant
FABP6	2172	0.02697	0.92616	0.058453	0.59493	0.0288015	0.054487	not significant
ITIH2	3698	0.012907	0.97123	0.058375	0.55617	0.0126505	0.0544445	not significant
PNPLA2	57104	0.046242	0.83719	0.058366	0.53521	0.0497675	0.0544335	not significant
PDIA2	64714	0.02926	0.91724	0.05835	0.59273	0.0314225	0.0544185	not significant
DSCAML1	57453	-0.013595	0.97454	0.058277	0.64379	-0.0140635	0.0543815	not significant
GFRAL	389400	-0.02543	0.94191	0.058276	0.55105	-0.0265725	0.054356	not significant
CLVS2	134829	0.018373	0.96023	0.058258	0.64927	0.018793	0.054346	not significant
PPARG	5468	0.042007	0.80716	0.058223	0.53592	0.045657	0.0543275	not significant
CDK4	1019	-0.039054	0.8679	0.05815	0.58376	-0.0394305	0.054282	not significant
ALPP	250	0.0034794	0.99171	0.058133	0.56075	0.0024288	0.0542715	not significant
ZSCAN29	146050	-0.051945	0.69491	0.058126	0.5278	-0.0513705	0.054268	not significant
CLDN23	137075	0.055879	0.7324	0.058092	0.67784	0.0601615	0.0542285	not significant
MGA	23269	-0.16464	0.008134	0.05806	0.59526	-0.128886	0.054205	KO negative
APRT	353	-0.049741	0.76424	0.058058	0.62668	-0.0493385	0.054195	not significant
ZBTB37	84614	-0.019848	0.94869	0.058048	0.54567	-0.020779	0.0541885	not significant
OR51E2	81285	0.026761	0.92492	0.058033	0.61154	0.0284845	0.0541675	not significant
IQGAP1	8826	0.069216	0.53241	0.057994	0.64221	0.0730575	0.054147	not significant
B3GNT8	374907	-0.027792	0.91775	0.057932	0.55617	-0.02893	0.0541055	not significant
MAPKAPK3	7867	0.055144	0.73105	0.057927	0.54068	0.059284	0.054099	not significant
STT3A	3703	-0.14642	0.015353	0.057908	0.5886	-0.117595	0.054083	KO negative
NTAN1	123803	-0.0037592	0.98961	0.057882	0.65129	-0.0031366	0.0540525	not significant
MCAT	27349	-0.048066	0.80442	0.057855	0.59415	-0.0477175	0.0540325	not significant
LBX1	10660	0.0047018	0.98703	0.057854	0.59664	0.0036562	0.054022	not significant
ALX4	60529	0.025896	0.94063	0.057776	0.56663	0.0272705	0.0539585	not significant
EPHX4	253152	0.044688	0.83527	0.057694	0.54996	0.048351	0.053912	not significant
MOCS1	4337	0.057987	0.66082	0.057686	0.58049	0.062257	0.0539075	not significant
LONP1	9361	-0.28713	0.0017812	0.057596	0.62905	-0.20348	0.0538565	KO negative
OPN4	94233	0.013704	0.97454	0.05759	0.59914	0.0135575	0.053826	not significant
TNFRSF12A	51330	-0.029736	0.91453	0.057575	0.60057	-0.0309365	0.0538075	not significant
COL9A3	1299	-0.071204	0.53715	0.057541	0.61774	-0.0677865	0.053786	not significant
NQO2	4835	-0.029542	0.91775	0.05753	0.62008	-0.030645	0.05378	not significant
MCM6	4175	-0.029446	0.96023	0.057484	0.57212	-0.030562	0.0537485	not significant
IZUMO2	126123	0.019877	0.95363	0.057442	0.59586	0.0204095	0.053702	not significant
SH3RF2	153769	-0.0074353	0.98619	0.05744	0.61194	-0.00723085	0.0537	not significant
FNDC3A	22862	0.021196	0.94421	0.0574	0.6423	0.0220155	0.0536765	not significant
LIPK	643414	-0.001009	0.99533	0.057391	0.57403	-0.0005045	0.053671	not significant
TMEM211	255349	-0.0070538	0.98619	0.057363	0.54996	-0.00680155	0.053657	not significant
STEAP2	261729	0.021797	0.94316	0.057297	0.60293	0.0227485	0.0536025	not significant
DOK7	285489	-0.070624	0.5877	0.057275	0.61293	-0.0673595	0.053562	not significant
PPID	5481	-0.0056189	0.98619	0.057176	0.64027	-0.005244	0.053512	not significant
MSRB2	22921	0.016457	0.96282	0.057139	0.60293	0.0166955	0.053462	not significant
MAP4K3	8491	0.04261	0.82858	0.05712	0.55942	0.0462725	0.0533615	not significant
PHF21B	112885	-0.024028	0.94057	0.057102	0.59723	-0.0250075	0.0533455	not significant
PITPNM3	83394	-0.059812	0.62863	0.057065	0.71385	-0.0582645	0.0533245	not significant
EFNB3	1949	0.011914	0.97454	0.057052	0.58484	0.0114865	0.0533085	not significant
GOLT1B	51026	-0.02957	0.91256	0.057047	0.77237	-0.030659	0.0532985	not significant
FBP2	8789	0.010607	0.97995	0.057026	0.53629	0.0101749	0.053284	not significant
ABCB5	340273	0.083288	0.22218	0.056995	0.59996	0.086287	0.053267	not significant
RPS6KA2	6196	0.04498	0.79534	0.056993	0.62008	0.048621	0.0532615	not significant
SYP	6855	0.047055	0.7302	0.056988	0.67349	0.0506095	0.053248	not significant
IRAK1	3654	-0.036455	0.87344	0.056934	0.63004	-0.037309	0.0532015	not significant
LIPG	9388	-0.01506	0.9669	0.056879	0.60057	-0.015511	0.053169	not significant
PIGW	284098	-0.067324	0.54739	0.056863	0.63099	-0.0648735	0.053141	not significant
GREB1L	80000	-0.071784	0.50795	0.056862	0.64221	-0.068349	0.0531325	not significant
GPM6A	2823	0.037659	0.82701	0.056823	0.62008	0.040764	0.0531115	not significant
TRIM44	54765	0.068943	0.57414	0.056775	0.60283	0.0728105	0.0530875	not significant
TNF	7124	-0.015482	0.96955	0.056746	0.57924	-0.016007	0.05306	not significant
MME	4311	0.04593	0.8015	0.056745	0.59415	0.0495215	0.053046	not significant
WFIKKN2	124857	0.00044465	0.99726	0.056713	0.59996	0.000222325	0.053022	not significant
PDE6B	5158	-0.028433	0.9251	0.056698	0.61154	-0.029547	0.0530075	not significant
UBE2Z	65264	-0.067167	0.50505	0.056697	0.59336	-0.0646885	0.053004	not significant
BTBD19	149478	-0.041704	0.84853	0.056678	0.53793	-0.0417655	0.0529845	not significant
USP9X	8239	0.18756	0.0049642	0.056577	0.55727	0.163175	0.0529305	KO positive
WNT6	7475	0.05823	0.66116	0.056576	0.64221	0.0624205	0.0529275	not significant
OR6C3	254786	0.033971	0.8679	0.056573	0.56416	0.0367785	0.052923	not significant
TSC2	7249	-0.66036	1.4e-37	0.056544	0.77905	-0.43681	0.052896	KO negative
GPR31	2853	0.013196	0.97169	0.05653	0.64714	0.013001	0.0528505	not significant
SYT11	23208	0.11092	0.18242	0.056519	0.6751	0.109795	0.0528355	not significant
IGFBPL1	347252	0.12893	0.049862	0.056516	0.57924	0.1246	0.052832	KO positive
UBE2G1	7326	0.10539	0.09929	0.056486	0.62425	0.1046	0.0528	not significant
EPHX2	2053	-0.011693	0.97915	0.056478	0.61774	-0.0119795	0.0527845	not significant
CCL2	6347	0.0086594	0.98269	0.056392	0.61991	0.0080634	0.0527055	not significant
TLL1	7092	-0.027778	0.92501	0.056389	0.60718	-0.0289135	0.052698	not significant
NAGS	162417	-0.0096844	0.98139	0.056388	0.57595	-0.0094133	0.052691	not significant
LRFN3	79414	-0.010542	0.98301	0.05638	0.58332	-0.0105055	0.0526835	not significant
DBT	1629	0.043703	0.81017	0.056375	0.58147	0.047263	0.052674	not significant
PARP8	79668	-0.052135	0.74776	0.056288	0.62884	-0.0516195	0.0526215	not significant
MTFMT	123263	0.018689	0.95418	0.056278	0.59415	0.0191145	0.0525855	not significant
PPM1L	151742	0.012152	0.97423	0.056254	0.63288	0.0117325	0.0525635	not significant
E2F4	1874	-0.099981	0.12533	0.056206	0.5886	-0.087734	0.052539	not significant
KLHL33	123103	0.012658	0.97454	0.056202	0.60057	0.0123985	0.0525245	not significant
LY75	4065	0.0031385	0.99171	0.056183	0.67784	0.0019417	0.052492	not significant
SPACA5B	729201	0.065913	0.6955	0.056182	0.54107	0.0701845	0.05248	not significant
BTBD7	55727	-0.033475	0.88481	0.056181	0.74578	-0.0343435	0.0524705	not significant
GATA3	2625	-0.043452	0.79572	0.056156	0.59415	-0.0433755	0.05244	not significant
TPTE	7179	0.001648	0.99533	0.056129	0.64927	0.000824	0.052425	not significant
ABHD2	11057	0.027438	0.91256	0.056112	0.61433	0.029376	0.0524125	not significant
BMP10	27302	0.096864	0.12039	0.05611	0.59586	0.0982805	0.052402	not significant
DGAT2L6	347516	-0.034037	0.89123	0.05609	0.58628	-0.034933	0.0523875	not significant
AFG3L2	10939	-0.028537	0.96023	0.056067	0.59415	-0.029629	0.0523655	not significant
GLYCTK	132158	-0.037109	0.89123	0.056031	0.64099	-0.0378405	0.0523375	not significant
FAM173A		0.020882	0.94377	0.056023	0.61295	0.021617	0.0523005	not significant
ADRA1D	146	0.020608	0.9515	0.056012	0.58696	0.0212885	0.0522895	not significant
VTA1	51534	-0.119	0.065182	0.055972	0.59415	-0.0999895	0.0522475	not significant
SETMAR	6419	-0.054626	0.75134	0.055967	0.61476	-0.053822	0.0522445	not significant
SMPD3	55512	0.065786	0.72166	0.055964	0.58618	0.0699605	0.0522235	not significant
IL22RA2	116379	0.032071	0.90912	0.055948	0.58919	0.0345795	0.052203	not significant
CSHL1	1444	0.00070647	0.99576	0.055922	0.61295	0.000353235	0.052189	not significant
HTR3A	3359	0.038744	0.84307	0.055909	0.67966	0.041967	0.052179	not significant
SPATA13	221178	-0.0035408	0.99146	0.055899	0.60057	-0.00286805	0.0521735	not significant
ACVRL1	94	-0.016545	0.96023	0.055878	0.58332	-0.0173305	0.0521575	not significant
GCNT4	51301	0.057531	0.684	0.055875	0.62005	0.061804	0.052151	not significant
ZMYND8	23613	-0.039527	0.85363	0.055855	0.67952	-0.039761	0.0521397	not significant
WDPCP	51057	0.024753	0.92616	0.055855	0.72063	0.0261015	0.0521397	not significant
MARK4	57787	0.052657	0.75854	0.055847	0.71298	0.0567065	0.0521255	not significant
GULP1	51454	0.0225	0.94057	0.0558	0.59415	0.023544	0.0520895	not significant
GTF2A2	2958	-0.15929	0.20229	0.055786	0.64027	-0.125605	0.0520795	not significant
PDE6H	5149	0.047091	0.77818	0.055781	0.58329	0.050667	0.0520755	not significant
MMACHC	25974	-7.31e-05	0.99973	0.055751	0.61687	-3.655e-05	0.0520605	not significant
PCDHA7	56141	0.011452	0.97454	0.055693	0.56724	0.0110255	0.0520215	not significant
ZNF454	285676	-0.048515	0.7445	0.055687	0.64027	-0.0481575	0.052006	not significant
TMEM202	338949	0.030688	0.89123	0.055684	0.58049	0.0329882	0.052002	not significant
TMEM260	54916	-0.013482	0.97064	0.055665	0.59586	-0.013902	0.0519705	not significant
KCNJ5	3762	-0.023435	0.93947	0.055663	0.72855	-0.024354	0.051968	not significant
E2F3	1871	-0.072868	0.41352	0.055631	0.58476	-0.069132	0.0519455	not significant
IP6K2	51447	0.024548	0.93186	0.055615	0.60379	0.025856	0.0519375	not significant
RUFY4	285180	0.069462	0.51308	0.055539	0.67358	0.073243	0.051897	not significant
GALNT15	117248	0.024894	0.93577	0.055496	0.59233	0.0262265	0.0518635	not significant
CALY	50632	0.052058	0.69491	0.055491	0.60283	0.056136	0.0518555	not significant
PCDHGC5	56097	-0.010668	0.97635	0.055489	0.59415	-0.010643	0.051837	not significant
FGD1	2245	0.047763	0.77818	0.055482	0.66003	0.051357	0.0518305	not significant
SPINT1	6692	0.045678	0.8015	0.055408	0.5886	0.049241	0.051793	not significant
AIFM1	9131	-0.20441	0.022958	0.055384	0.62435	-0.15341	0.0517785	KO negative
RXFP2	122042	-0.015198	0.96565	0.055367	0.61991	-0.015672	0.0517555	not significant
CDHR1	92211	0.02103	0.95364	0.055352	0.59415	0.0217955	0.0517405	not significant
MS4A2	2206	-0.011911	0.97454	0.055306	0.59415	-0.0122845	0.0517095	not significant
STK32B	55351	-0.054145	0.72761	0.055304	0.59915	-0.0532615	0.0517075	not significant
TSPAN6	7105	0.024994	0.94057	0.055263	0.68461	0.026327	0.051669	not significant
FTO	79068	-0.18471	9.52e-05	0.055252	0.6415	-0.14088	0.051657	KO negative
MANSC1	54682	0.0029268	0.99329	0.055241	0.74658	0.0017499	0.051639	not significant
TREML1	340205	0.042584	0.77675	0.055177	0.58628	0.046254	0.0516025	not significant
ARHGAP27	201176	-0.02124	0.94373	0.055147	0.59233	-0.0221965	0.0515855	not significant
B3GALT5	10317	-0.030211	0.91775	0.055142	0.64988	-0.031388	0.051562	not significant
EXT1	2131	0.041825	0.84428	0.055139	0.58915	0.045401	0.051559	not significant
TMEM145	284339	-0.023509	0.94057	0.055109	0.64252	-0.024428	0.051538	not significant
SERTM1	400120	0.038777	0.82809	0.055108	0.62028	0.042011	0.0515335	not significant
KSR2	283455	0.040824	0.84088	0.055103	0.67076	0.0441855	0.051531	not significant
STX1A	6804	0.031724	0.88664	0.055086	0.61991	0.034265	0.051476	not significant
OR5T2	219464	-0.019571	0.94442	0.055074	0.59415	-0.020492	0.0514555	not significant
CHRM2	1129	-0.026608	0.92616	0.055034	0.59358	-0.027814	0.0514255	not significant
TXNRD1	7296	-0.28589	1.62e-09	0.055001	0.62176	-0.202615	0.051404	KO negative
NFE2	4778	-0.0038305	0.98961	0.054982	0.59415	-0.0032176	0.0513905	not significant
OPCML	4978	-0.012317	0.97454	0.054977	0.75188	-0.0126715	0.0513835	not significant
NRSN1	140767	-0.031456	0.91775	0.054969	0.63452	-0.0325085	0.0513735	not significant
CATSPER2	117155	-0.03434	0.91724	0.054956	0.65203	-0.0352325	0.0513605	not significant
GFM1	85476	-0.12958	0.22218	0.054951	0.65623	-0.106479	0.051357	not significant
PEX2	5828	0.027879	0.91857	0.054942	0.64821	0.029838	0.0513445	not significant
SLC27A4	10999	-0.022572	0.94225	0.054937	0.64221	-0.0234935	0.051324	not significant
APOA2	336	-0.057275	0.74652	0.054932	0.60625	-0.0561225	0.051314	not significant
CCL3	6348	0.015542	0.96637	0.054893	0.58049	0.015629	0.051293	not significant
CTSV	1515	0.046294	0.75542	0.054871	0.76837	0.0497965	0.0512815	not significant
UBE2W	55284	-0.13327	0.0069656	0.054868	0.58696	-0.108922	0.051265	KO negative
PRICKLE2	166336	0.04729	0.76424	0.054857	0.60057	0.050886	0.0512375	not significant
CCL15	6359	0.083613	0.23628	0.0548	0.57282	0.086591	0.051181	not significant
ABCC5	10057	-0.005238	0.98619	0.054715	0.63288	-0.00487595	0.051136	not significant
RMDN2	151393	0.023842	0.9372	0.054692	0.59664	0.025201	0.0511135	not significant
CXCL2	2920	0.008506	0.98401	0.054643	0.62294	0.0079104	0.0510845	not significant
TLR1	7096	0.023264	0.93687	0.054611	0.61991	0.0245585	0.051047	not significant
OR6B1	135946	-0.013838	0.97454	0.054609	0.60057	-0.014331	0.051045	not significant
ATP1B2	482	0.070087	0.5743	0.054575	0.62801	0.0738505	0.0510245	not significant
TRMT61A	115708	-0.43202	0.0010457	0.054558	0.64027	-0.289985	0.051001	KO negative
TEX2	55852	-0.053095	0.72668	0.054551	0.62294	-0.0524555	0.05095	not significant
KATNA1	11104	0.059853	0.551	0.054551	0.61293	0.064069	0.05095	not significant
ARG2	384	-0.048164	0.79318	0.054533	0.6272	-0.0478405	0.050938	not significant
GON4L	54856	-0.059293	0.698	0.054522	0.64717	-0.0578045	0.050906	not significant
KCNIP2	30819	0.025202	0.93376	0.054442	0.59415	0.026517	0.050866	not significant
C14orf180	400258	0.059595	0.67304	0.054431	0.58512	0.0638055	0.050853	not significant
RFK	55312	-0.010186	0.98577	0.054424	0.62683	-0.0100901	0.05083	not significant
FGD2	221472	-0.048687	0.75232	0.054422	0.58332	-0.0483615	0.0508275	not significant
USP25	29761	-0.063286	0.58619	0.054371	0.57229	-0.061428	0.0507795	not significant
FGF4	2249	-0.00052284	0.99729	0.054276	0.61929	-0.00026142	0.0507035	not significant
GTF3C4	9329	0.068505	0.78303	0.054249	0.64717	0.0724365	0.050684	not significant
ALKBH8	91801	0.010651	0.97995	0.054246	0.63481	0.0102066	0.0506765	not significant
ARAF	369	0.075759	0.42746	0.054243	0.64927	0.079339	0.050667	not significant
P4HTM	54681	-0.013017	0.97301	0.054229	0.59493	-0.0134485	0.050656	not significant
PAK4	10298	0.062246	0.71617	0.054209	0.62008	0.0664385	0.0506435	not significant
KDM3B	51780	0.26517	1.2e-09	0.054208	0.71385	0.212695	0.050638	KO positive
TIMP1	7076	0.090869	0.30488	0.0542	0.63727	0.093077	0.0506315	not significant
PLK1	5347	-0.12187	0.94421	0.054173	0.65509	-0.101853	0.0506175	not significant
MIER1	57708	0.063518	0.52429	0.054164	0.60379	0.067578	0.0506095	not significant
MAG	4099	0.035129	0.89123	0.054164	0.62323	0.0379965	0.0506095	not significant
MARCH8		0.12351	0.11733	0.05416	0.64099	0.11968	0.0506075	not significant
UNC5CL	222643	0.0033799	0.99125	0.054094	0.60057	0.002291	0.050563	not significant
CLEC11A	6320	0.0182	0.96484	0.054071	0.65848	0.018635	0.050545	not significant
NODAL	4838	-0.035437	0.87856	0.054069	0.6272	-0.036327	0.0505405	not significant
SLC38A8	146167	0.058797	0.63934	0.054062	0.59586	0.06298	0.0505365	not significant
OR2T8	343172	0.035123	0.86111	0.05404	0.5997	0.037986	0.0505215	not significant
PTRH2	51651	0.14013	0.0067851	0.054035	0.61936	0.132305	0.0505165	KO positive
TTN	7273	0.04646	0.78609	0.05402	0.59415	0.0499885	0.0505055	not significant
CPT1A	1374	0.049284	0.75542	0.054004	0.60751	0.0529305	0.050497	not significant
CBR1	873	0.034765	0.90345	0.05399	0.61687	0.0375165	0.0504895	not significant
P2RX7	5027	0.010483	0.97915	0.053976	0.63727	0.0100839	0.0504625	not significant
GNG13	51764	-0.01829	0.9515	0.05393	0.59914	-0.019187	0.0504205	not significant
ELANE	1991	-0.035477	0.8679	0.053923	0.59586	-0.036354	0.0504025	not significant
TGM4	7047	0.0088581	0.98269	0.053922	0.59233	0.00829695	0.0503975	not significant
OTUD7A	161725	0.016751	0.96023	0.053893	0.63948	0.016967	0.050382	not significant
FMN1	342184	0.015006	0.96023	0.053888	0.66346	0.015164	0.050376	not significant
DIS3	22894	0.10814	0.38577	0.053883	0.66593	0.10724	0.05037	not significant
PREP	5550	-0.10741	0.06872	0.053882	0.61503	-0.0925975	0.050363	not significant
C17orf99	100141515	0.024307	0.94191	0.053829	0.59467	0.025623	0.0503365	not significant
CLDN10	9071	0.02484	0.93577	0.053814	0.67031	0.026176	0.0503195	not significant
ACSM1	116285	0.017137	0.96023	0.053812	0.61327	0.0174597	0.0502985	not significant
ANGPTL4	51129	0.0097977	0.98119	0.053767	0.64221	0.00924665	0.050276	not significant
DPH2	1802	-0.24018	1.81e-06	0.053738	0.59415	-0.17431	0.050261	KO negative
PROK2	60675	0.070209	0.58709	0.053728	0.68149	0.0739685	0.0502415	not significant
ADCY1	107	0.016408	0.96222	0.053723	0.59415	0.0166275	0.0502265	not significant
AMD1	262	-0.33032	2e-08	0.053716	0.61464	-0.22996	0.050214	KO negative
POU1F1	5449	-0.017355	0.9579	0.053707	0.59664	-0.0182235	0.0501955	not significant
HARS		0.067892	0.94421	0.053695	0.68133	0.072024	0.050182	not significant
LPA	4018	-0.0047468	0.98827	0.053692	0.64855	-0.0041421	0.0501795	not significant
SRPK1	6732	0.065967	0.49955	0.053674	0.62884	0.0702485	0.050159	not significant
PCGF3	10336	-0.052069	0.7514	0.053664	0.58211	-0.0515425	0.050128	not significant
TEC	7006	0.047275	0.75542	0.053641	0.67739	0.050853	0.050094	not significant
TBX5	6910	0.039634	0.81626	0.053578	0.64221	0.0429925	0.0500615	not significant
SEMA3B	7869	0.0057668	0.98619	0.05357	0.61476	0.0047983	0.0500495	not significant
SLC9A3R1	9368	0.1027	0.1017	0.053556	0.65379	0.10255	0.05003	not significant
SLC17A9	63910	-0.046226	0.79536	0.053555	0.60804	-0.0462045	0.050019	not significant
ZFP37	7539	0.0045093	0.98921	0.053517	0.64027	0.00341785	0.0499885	not significant
HTR1B	3351	-0.013373	0.97125	0.053509	0.70849	-0.013781	0.0499755	not significant
RAP1B	5908	0.0059909	0.98619	0.053483	0.63346	0.00506245	0.049961	not significant
DAPK3	1613	-0.0031625	0.99319	0.053462	0.60057	-0.00250875	0.0499315	not significant
IL1R2	7850	-0.046156	0.85333	0.053449	0.66003	-0.046135	0.049917	not significant
SEC11A	23478	0.084391	0.25721	0.053383	0.64112	0.0873475	0.0498735	not significant
MAP2K6	5608	-0.0034844	0.98981	0.053363	0.6166	-0.00280685	0.049862	not significant
PSORS1C2	170680	-0.05376	0.73339	0.053357	0.5886	-0.052957	0.049839	not significant
FREM2	341640	0.0053358	0.98619	0.053299	0.65542	0.00428735	0.0497965	not significant
KIAA1549L	25758	0.0013449	0.99533	0.053296	0.60293	0.00067245	0.0497735	not significant
CER1	9350	0.042419	0.78261	0.053293	0.61732	0.0460875	0.0497675	not significant
IKZF3	22806	0.030592	0.91503	0.053289	0.60379	0.032834	0.0497485	not significant
GOLGA1	2800	0.0024617	0.99533	0.05328	0.69232	0.00134824	0.0497395	not significant
MROH7	374977	-0.04365	0.77114	0.053274	0.62294	-0.043608	0.049723	not significant
DHX9	1660	-0.065028	0.89689	0.053257	0.67208	-0.0628265	0.049714	not significant
DNM3	26052	0.038537	0.84592	0.053236	0.59586	0.0417835	0.0497035	not significant
ESM1	11082	0.062132	0.62409	0.053225	0.64291	0.066333	0.049685	not significant
LDHC	3948	-0.064877	0.55563	0.053216	0.60698	-0.062749	0.049676	not significant
NBEA	26960	0.032455	0.90414	0.05321	0.61991	0.0349705	0.0496685	not significant
ANKRD27	84079	0.015176	0.96338	0.0532	0.59493	0.0152845	0.0496385	not significant
CACNG1	786	0.021946	0.94225	0.053197	0.64099	0.022932	0.0496205	not significant
CLK2	1196	-0.013944	0.97137	0.053155	0.62683	-0.0144155	0.049553	not significant
PIGP	51227	-0.17243	0.00042849	0.053144	0.71018	-0.133896	0.049542	KO negative
NDOR1	27158	-0.13212	0.23682	0.053115	0.66003	-0.108186	0.0495245	not significant
SEZ6	124925	0.01945	0.96655	0.053113	0.59664	0.0199345	0.0495215	not significant
TMEM98	26022	0.013362	0.9722	0.053083	0.76364	0.013213	0.049496	not significant
OGFOD2	79676	-0.025047	0.9436	0.053073	0.59436	-0.0260958	0.0494905	not significant
SMS	6611	0.0034346	0.99275	0.05301	0.6551	0.0023527	0.049458	not significant
ALOX12B	242	0.038003	0.8679	0.053006	0.62839	0.041201	0.0494525	not significant
EXOSC10	5394	0.092419	0.57989	0.052996	0.64112	0.094661	0.0494345	not significant
DGKZ	8525	0.018108	0.97064	0.05296	0.60057	0.0185155	0.049404	not significant
BRINP3	339479	0.021665	0.94869	0.052952	0.62764	0.0225955	0.049395	not significant
PILRA	29992	0.017634	0.95695	0.052944	0.59415	0.017889	0.049389	not significant
CKLF	51192	-0.037012	0.85456	0.052943	0.66003	-0.0377155	0.0493825	not significant
RALGDS	5900	0.029411	0.91399	0.052937	0.60057	0.031576	0.049369	not significant
GFOD2	81577	0.015104	0.9722	0.052928	0.61154	0.015231	0.049352	not significant
ATG9B	285973	0.034745	0.88482	0.052925	0.60133	0.037492	0.0493365	not significant
DDX27	55661	-0.050401	0.93987	0.052888	0.61154	-0.0499075	0.0493055	not significant
NKAIN1	79570	-0.024235	0.94191	0.052843	0.62226	-0.025256	0.0492735	not significant
NPTXR	23467	-0.037287	0.87924	0.052836	0.64027	-0.0380405	0.0492605	not significant
ZNF407	55628	-0.11416	0.23036	0.052804	0.60293	-0.0971285	0.049241	not significant
STRN3	29966	-0.07524	0.5432	0.052784	0.63148	-0.0708195	0.0492185	not significant
IL21R	50615	0.063704	0.6425	0.052783	0.63288	0.0677515	0.0492	not significant
LRRTM1	347730	0.0021611	0.99533	0.05277	0.59493	0.00108055	0.0491865	not significant
PAQR9	344838	0.036591	0.85304	0.052759	0.65245	0.0396975	0.0491655	not significant
CLCN1	1180	-0.040074	0.82809	0.052758	0.60293	-0.0402595	0.049158	not significant
CTF1	1489	0.022659	0.94225	0.052757	0.64221	0.023792	0.049155	not significant
C9orf57	138240	0.043938	0.7837	0.05275	0.60448	0.0475055	0.049124	not significant
DNMT3A	1788	0.070903	0.46689	0.052747	0.70385	0.074552	0.049114	not significant
CACNA1I	8911	0.026977	0.92616	0.052744	0.59664	0.0288075	0.0490915	not significant
ZBTB7B	51043	0.0093559	0.98269	0.052732	0.69786	0.0087609	0.0490615	not significant
SLC40A1	30061	-0.016767	0.96023	0.052717	0.67478	-0.0175535	0.0490485	not significant
CRTAC1	55118	0.021931	0.94191	0.052711	0.6591	0.0229127	0.0490395	not significant
CTRB2	440387	0.078085	0.40074	0.052672	0.61154	0.0816325	0.049019	not significant
SPPL2A	84888	0.0046916	0.98841	0.052643	0.61327	0.00364535	0.0489975	not significant
PIGC	5279	-0.078004	0.4839	0.052614	0.61154	-0.072902	0.0489695	not significant
OTOR	56914	0.032814	0.88693	0.052549	0.59493	0.035506	0.0489125	not significant
CHST1	8534	0.010236	0.98051	0.052529	0.6919	0.00975135	0.0488895	not significant
DGKD	8527	0.2287	3.25e-07	0.052527	0.60716	0.188635	0.0488825	KO positive
NPY5R	4889	-0.0047374	0.98644	0.052526	0.60057	-0.00412795	0.048859	not significant
TRPV6	55503	-0.033922	0.90478	0.052484	0.63957	-0.0348365	0.0488315	not significant
C9orf3		-0.0014015	0.99533	0.052459	0.60057	-0.00070075	0.0488175	not significant
WFDC8	90199	-0.016951	0.97064	0.052435	0.66464	-0.0177455	0.0488035	not significant
CDHR3	222256	-0.0045586	0.98779	0.05242	0.59914	-0.00396275	0.0487725	not significant
FAM3A	60343	-0.043188	0.80411	0.052382	0.61749	-0.043068	0.0487455	not significant
CS	1431	-0.67157	1.3e-39	0.05236	0.61327	-0.44328	0.0487	KO negative
CD44	960	-0.12462	0.030577	0.052341	0.67355	-0.103537	0.048681	KO negative
SLC25A37	51312	0.0021982	0.99533	0.052293	0.70385	0.0010991	0.048655	not significant
USH1G	124590	0.015706	0.97123	0.052264	0.60551	0.0158345	0.0486245	not significant
GJA10	84694	-0.00039244	0.99726	0.052262	0.59443	-0.00019622	0.048621	not significant
JMJD6	23210	-0.1792	0.0023962	0.052227	0.60057	-0.137858	0.0485855	KO negative
TNFRSF17	608	-0.039691	0.82028	0.052206	0.64863	-0.0399235	0.048563	not significant
NR2F6	2063	-0.051387	0.76193	0.052191	0.6415	-0.050879	0.0485405	not significant
IL3RA	3563	-0.036814	0.87898	0.05209	0.65116	-0.037565	0.048456	not significant
GALK1	2584	0.10027	0.15622	0.052081	0.66085	0.100465	0.0484515	not significant
TCEA3	6920	0.047696	0.77818	0.05208	0.62846	0.051314	0.048442	not significant
ACOX2	8309	0.052897	0.69624	0.052075	0.68175	0.056958	0.0484375	not significant
NDP	4693	-0.020407	0.94869	0.052074	0.60057	-0.0212855	0.048432	not significant
ZNF879	345462	0.028876	0.91775	0.05207	0.65269	0.030976	0.0484135	not significant
HOXA4	3201	-0.033829	0.91256	0.052061	0.61725	-0.0347295	0.0483905	not significant
CDCA2	157313	0.041843	0.80937	0.052056	0.63948	0.0454255	0.048388	not significant
PHF2	5253	0.058447	0.77234	0.052039	0.63948	0.0626765	0.0483725	not significant
ALDH1A2	8854	0.099358	0.16202	0.052029	0.622	0.099959	0.048361	not significant
TRABD2B	388630	-0.025582	0.94442	0.052014	0.63288	-0.0267455	0.048351	not significant
TAOK1	57551	0.21341	2.37e-07	0.051969	0.7434	0.178985	0.0483165	KO positive
FAM8A1	51439	0.0029576	0.99223	0.05195	0.62294	0.00178027	0.048297	not significant
NYNRIN	57523	0.03253	0.89565	0.051936	0.62397	0.035071	0.0482865	not significant
GCHFR	2644	0.029928	0.91035	0.051934	0.71322	0.032072	0.048282	not significant
SPG7	6687	-0.051377	0.77675	0.051923	0.61838	-0.0508445	0.048276	not significant
GABRP	2568	-0.0033748	0.99184	0.051922	0.67275	-0.00270845	0.0482725	not significant
HECTD1	25831	0.19606	0.0044851	0.051835	0.62578	0.169015	0.048221	KO positive
HLCS	3141	0.18321	0.00022522	0.051805	0.64988	0.15984	0.0481965	KO positive
RAC2	5880	-0.0048799	0.98841	0.051729	0.63346	-0.00433195	0.048158	not significant
NUDT12	83594	0.082028	0.39616	0.051716	0.60604	0.085131	0.0481485	not significant
CREB3L2	64764	-0.028619	0.91898	0.051706	0.70385	-0.0296955	0.048143	not significant
MED26	9441	-0.1967	0.088572	0.051653	0.67138	-0.148675	0.048109	not significant
ITGAE	3682	-0.0092717	0.98315	0.051632	0.60057	-0.00899695	0.0480975	not significant
TTC17	55761	0.005515	0.98619	0.051625	0.66031	0.0045009	0.0480905	not significant
TM7SF3	51768	0.0083249	0.98438	0.051601	0.72444	0.00766155	0.048076	not significant
PLLP	51090	0.037837	0.83576	0.051598	0.65245	0.0409715	0.0480655	not significant
FES	2242	0.045021	0.79318	0.051555	0.6415	0.048681	0.048034	not significant
ARL1	400	-0.0090114	0.98119	0.051544	0.72555	-0.0087256	0.048022	not significant
COL1A1	1277	0.035973	0.91348	0.051536	0.62176	0.039113	0.0479965	not significant
DPP10	57628	-0.027684	0.91724	0.051475	0.64968	-0.02883	0.0479655	not significant
SCARF2	91179	-0.072035	0.75232	0.051437	0.67739	-0.06852	0.047945	not significant
ARIH1	25820	-0.096708	0.30851	0.051428	0.62008	-0.085508	0.047923	not significant
CHRNA2	1135	-0.007016	0.98619	0.051425	0.62176	-0.006752	0.0479125	not significant
SFRP4	6424	0.060555	0.63797	0.051416	0.64979	0.064679	0.0478925	not significant
SLC6A1	6529	-0.0050884	0.98619	0.051382	0.64291	-0.0045855	0.047864	not significant
ILK	3611	-0.22524	1.64e-06	0.051364	0.61295	-0.165805	0.047845	KO negative
CD300LB	124599	0.027754	0.91724	0.051361	0.63366	0.029716	0.0478235	not significant
COLEC10	10584	-0.025399	0.92749	0.051358	0.61293	-0.0265337	0.0478135	not significant
SMIM9	100132963	0.02238	0.94343	0.051357	0.66307	0.023414	0.0478085	not significant
OR1Q1	158131	-0.005114	0.98644	0.051268	0.61154	-0.0046855	0.0477325	not significant
GPM6B	2824	0.020657	0.94869	0.051266	0.63346	0.0213685	0.0477055	not significant
UCHL3	7347	-0.058555	0.66877	0.051246	0.7087	-0.0571965	0.0476845	not significant
MPZL3	196264	-0.012806	0.97301	0.051245	0.63099	-0.0132785	0.047671	not significant
PTGS1	5742	0.011148	0.97633	0.051225	0.65847	0.0106925	0.0476535	not significant
PIK3R6	146850	0.040403	0.82518	0.051196	0.63762	0.0437205	0.047632	not significant
ACOT2	10965	0.041769	0.80185	0.051165	0.64821	0.045341	0.0476075	not significant
TRIP11	9321	-0.0051697	0.98619	0.051115	0.66003	-0.00479425	0.047579	not significant
PARP10	84875	-0.070402	0.62495	0.051104	0.64342	-0.06717	0.047569	not significant
PRSS51		0	1	0.051095	0.61812	0	0.0475405	not significant
TMEM120B	144404	0.0085206	0.98269	0.051087	0.63197	0.00793665	0.047531	not significant
ENOPH1	58478	0.078884	0.40996	0.051077	0.65623	0.0825145	0.0475245	not significant
PROZ	8858	0.098594	0.22491	0.051074	0.648	0.099557	0.0475225	not significant
NAA11	84779	0.046669	0.80937	0.051073	0.655	0.050182	0.0475045	not significant
ACOT1	641371	-0.025763	0.92749	0.051073	0.66217	-0.026935	0.0475045	not significant
ADCY8	114	-0.033207	0.89565	0.05107	0.63346	-0.0340935	0.047498	not significant
SCN3A	6328	0.033485	0.86793	0.051048	0.64851	0.036354	0.047476	not significant
PSG11	5680	-0.016453	0.95771	0.051011	0.6267	-0.0171955	0.047441	not significant
TBX21	30009	-0.0088753	0.98269	0.051006	0.63346	-0.008606	0.047434	not significant
PNCK	139728	0.039929	0.81836	0.050974	0.71819	0.043284	0.0474015	not significant
SLC26A9	115019	0.060165	0.61826	0.050973	0.6644	0.0643895	0.0474005	not significant
TMEM186	25880	0.00529	0.98619	0.050968	0.69355	0.0042357	0.047394	not significant
AIF1	199	-0.00646	0.98619	0.050955	0.6415	-0.00611315	0.047369	not significant
[truncated: 8,766 more rows]
